# Supplementary material for: Photoinduced carbene transfer for copper-catalyzed asymmetric [4 + 1] cycloadditions: an entry to chiral indolines bearing quaternary stereocenters
Source: Royal Society of Chemistry journal article supplement (doi:10.1039/d3qo00551h), 2023-01-01
Supplement: d3qo00551h1.pdf [file d3qo00551h1.pdf]

## Supporting Information

### **Photoinduced carbene transfer for copper-catalyzed asymmetric [4+1] cycloadditions: an entry to chiral indolines bearing quaternary stereocenters**

Bao-Le Qu,<sup>a</sup> Bin Shi,<sup>a</sup> Lin He,<sup>a</sup> Jun-Wei Shi,<sup>a</sup> Wen-Jing Xiao<sup>a,b</sup> and Liang-Qiu Lu<sup>\*,a,c</sup>

<sup>a</sup>CCNU-uOttawa Joint Research Centre, Key Laboratory of Pesticide & Chemical Biology, Ministry of Education, College of Chemistry, Central China Normal University, Wuhan, Hubei 430079, China

<sup>b</sup>School of Chemistry and Chemical Engineering, Henan Normal University, Xinxiang, Henan 453007, China

<sup>c</sup>State Key Laboratory for Oxo Synthesis and Selective Oxidation, Lanzhou Institute of Chemical Physics (LICP), Chinese Academy of Sciences, Lanzhou, Gansu 730000, China

\*Email: luliangqiu@mail.ccnu.edu.cn

### **Table of Contents**

---

|                                                                    |            |
|--------------------------------------------------------------------|------------|
| <b>1. General Information</b>                                      | <b>S2</b>  |
| <b>2. Details for Condition Optimizations</b>                      | <b>S3</b>  |
| <b>3. General Procedures and Characterization Data of Products</b> | <b>S10</b> |
| <b>4. X-Ray Structures of Product 3u</b>                           | <b>S19</b> |
| <b>5. Copies of NMR Spectra</b>                                    | <b>S20</b> |
| <b>6. Copies of HPLC Spectra</b>                                   | <b>S51</b> |

## 1. General Information

**NMR spectra:**  $^1\text{H}$  NMR spectra were recorded on a 400/600 MHz spectrometer. Chemical shifts are reported in parts per million (ppm) and the spectra are calibrated to the resonance resulting from incomplete deuteration of the solvent ( $\text{CDCl}_3$ : 7.26 ppm).  $^{13}\text{C}$  NMR spectra were recorded on the same spectrometer with complete proton decoupling. Chemical shifts are reported in ppm with the solvent resonance as the internal standard ( $^{13}\text{CDCl}_3$ : 77.0 ppm,). Data are reported as follows: chemical shift  $\delta$ /ppm, integration ( $^1\text{H}$  only), multiplicity (s = singlet, d = doublet, t = triplet of doublets, m = multiplet or combinations thereof;  $^{13}\text{C}$  signals are singlets unless otherwise stated), coupling constants  $J$  in Hz, assignment.  $^{19}\text{F}$  NMR spectra were recorded on the same Spectrometer.

**High Resolution Mass Spectrometry (HRMS):** All were recorded on Bruker micrOTOF II ESI-TOF by ESI or APCI. Measured values are reported to 4 decimal places of the calculated value. The calculated values are based on the most abundant isotope.

**Chromatography:** Analytical thin layer chromatography was performed using Qingdao Puke Parting Materials Co. silica gel plates (Silicagel 60 F254). Visualisation was by ultraviolet fluorescence ( $\lambda = 254$  nm) and/or staining with Phosphomolybdic acid or potassium permanganate ( $\text{KMnO}_4$ ). Flash column chromatography was performed using 200-300 mesh silica gel. Optical rotations were measured with a polarimeter.  $[\alpha]$ . D values are reported at a given temperature ( $^\circ\text{C}$ ) in degrees  $\text{cm}^2 \text{g}^{-1}$  with concentration in  $\text{mg mL}^{-1}$ .

**Chiral HPLC:** Enantiomeric excesses (ee) values were determined by chiral HPLC with chiral AS-H, AD-H, AZ-H columns with hexane and *i*-PrOH as solvents.

**UV/Vis:** Measurements were made on a Shimadzu RF-6000 Spectro Fluorophotometer.

**Materials:** All the solvents were treated according to standard methods or through solvent purification systems before use. Substrates **1**,<sup>1</sup> **2a**<sup>2</sup> and **4**<sup>3</sup> were prepared according to previous methods and sulfides, copper salts and chiral ligands are commercially available.

## Reference

- (a) Q. Wang, T.-R. Li, L.-Q. Lu, M.-M. Li, K. Zhang and W.-J. Xiao, *J. Am. Chem. Soc.*, 2016, **138**, 8360-8363; (b) T.-R. Li, B.-Y. Cheng, Y.-N. Wang, M.-M. Zhang, L.-Q. Lu and W.-J. Xiao, *Angew. Chem. Int. Ed.*, 2016, **55**, 12422-12426.
- M. Ma, L. Peng, C. Li, X. Zhang, J. Wang, *J. Am. Chem. Soc.*, 2005, **127**, 15016-15017.
- (a) R. Hommelsheim, Y. Guo, Z. Yang, C. Empel and R. M. Koenigs, *Angew. Chem. Int. Ed.*, 2019, **58**, 1203-1207; (b) S. Jana, Z. Yang, C. Pei, X. Xu and R. M. Koenigs, *Chem. Sci.*, 2019, **10**, 10129-10134; (c) X. Gao, B. Wu, W.-X. Huang, M.-W. Chen, Y.-G. Zhou, *Angew. Chem. Int. Ed.*, 2015, **54**, 11956-11960.

## 2. Details for Condition Optimizations

**Table S1** The effect of ligand<sup>a</sup>

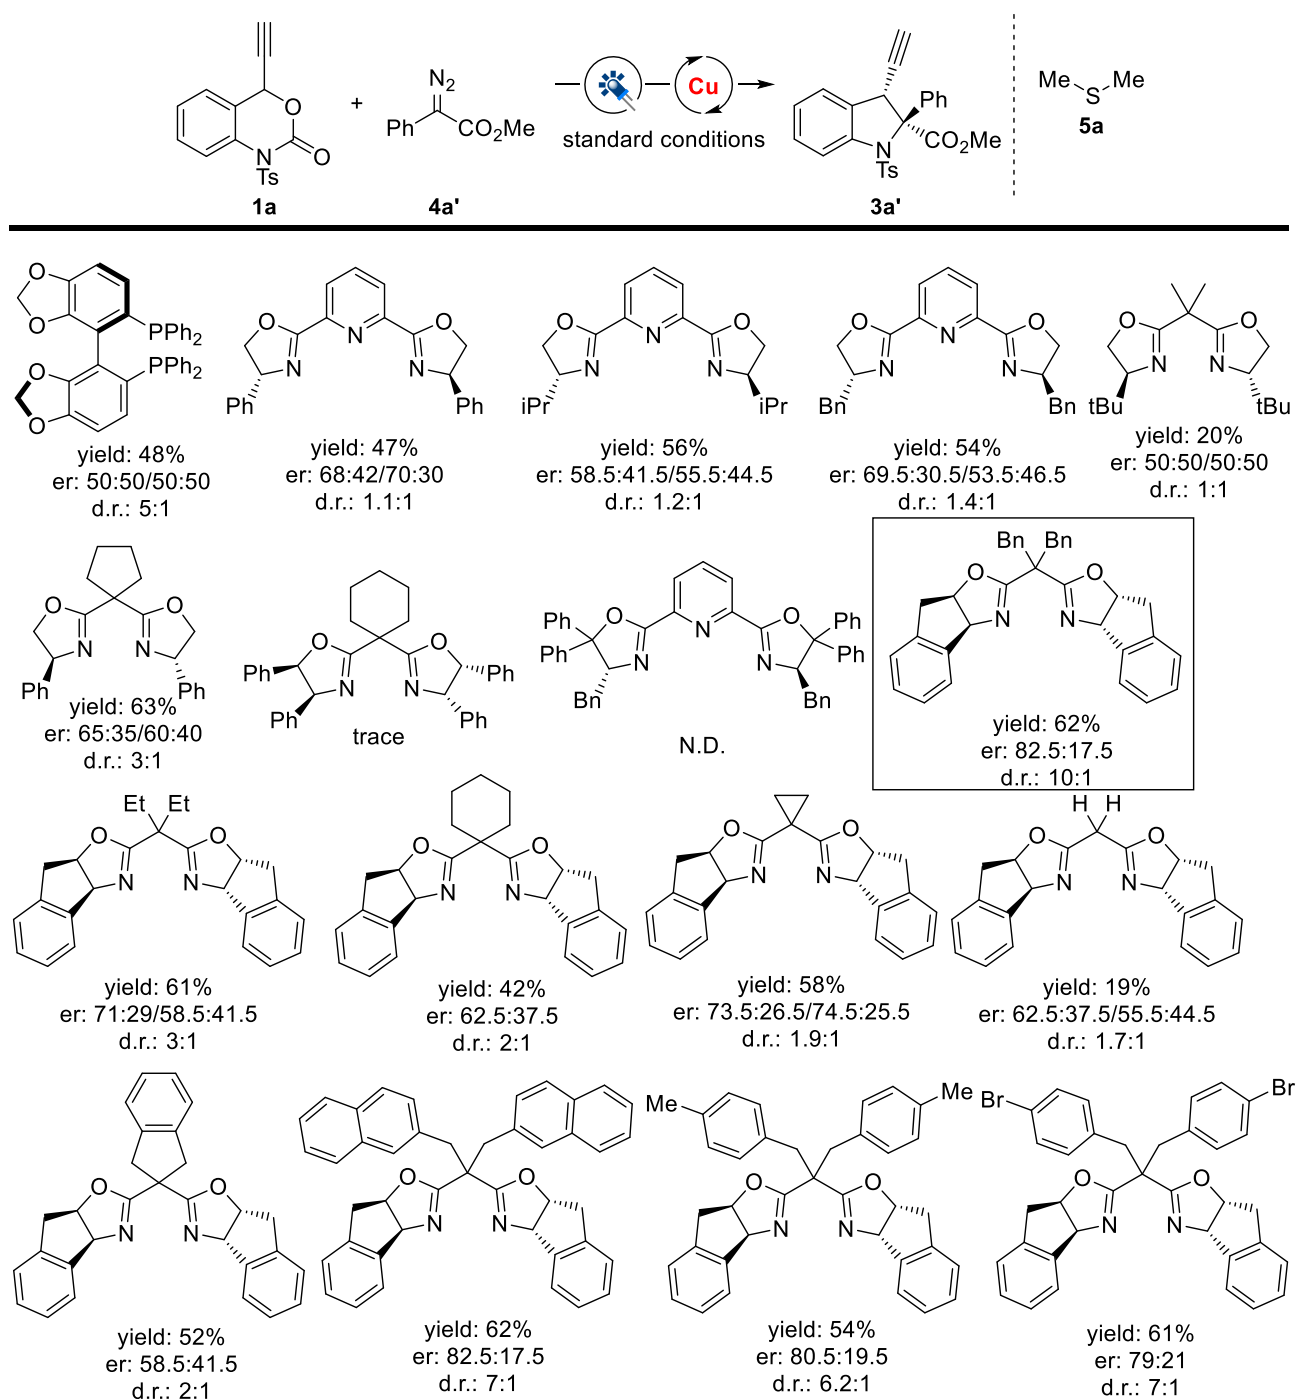

<sup>a</sup>Reaction conditions: **5a** (0.4 mmol), **4a'** (0.2 mmol) in 1 mL anhydrous toluene at r.t. under 6 W blue LEDs for 6 h; then the resulting solution of **4a'** together with **1a** (0.1 mmol) were added to the pre-prepared solution of Cu(OTf)<sub>2</sub> (10 mol%), ligand (15 mol%) and <sup>i</sup>Pr<sub>2</sub>NEt (0.12 mmol) in 1 mL anhydrous THF at 0 °C. <sup>b</sup>Yield of isolated product. <sup>c</sup>The diastereomeric ratios were determined by <sup>1</sup>H NMR spectroscopic analysis. <sup>d</sup>The er values were determined by HPLC.

**Table S2** The effect of sulfur ether<sup>a</sup>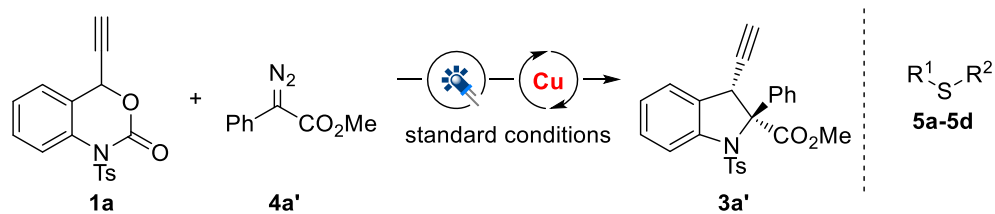

| Entry | R <sup>1</sup> | R <sup>2</sup> | Yield (%) <sup>b</sup> | d.r. <sup>c</sup> | e.r. <sup>d</sup> |
|-------|----------------|----------------|------------------------|-------------------|-------------------|
| 1     | Me             | Me             | 62                     | 10:1              | 82.5:17.5         |
| 2     | Me             | Et             | 59                     | 8:1               | 70:30             |
| 3     | Et             | Et             | 44                     | 5:1               | 77:23             |
| 4     | Me             | Ph             | trace                  | -                 | -                 |

<sup>a</sup>Reaction conditions: **5a-5d** (0.4 mmol), **4a'** (0.2 mmol) in 1 mL anhydrous toluene at r.t. under 6 W blue LEDs for 6 h; then the resulting solution of **5a-5d** together with **1a** (0.1 mmol) were added to the pre-prepared solution of Cu(OTf)<sub>2</sub> (10 mol%), ligand (15 mol%) and <sup>1</sup>Pr<sub>2</sub>NEt (0.12 mmol) in 1 mL anhydrous THF at 0 °C. <sup>b</sup>Yield of isolated product. <sup>c</sup>The diastereomeric ratios were determined by <sup>1</sup>H NMR spectroscopic analysis. <sup>d</sup>The er values were determined by HPLC.

**Table S3** The effect of ester group<sup>a</sup>

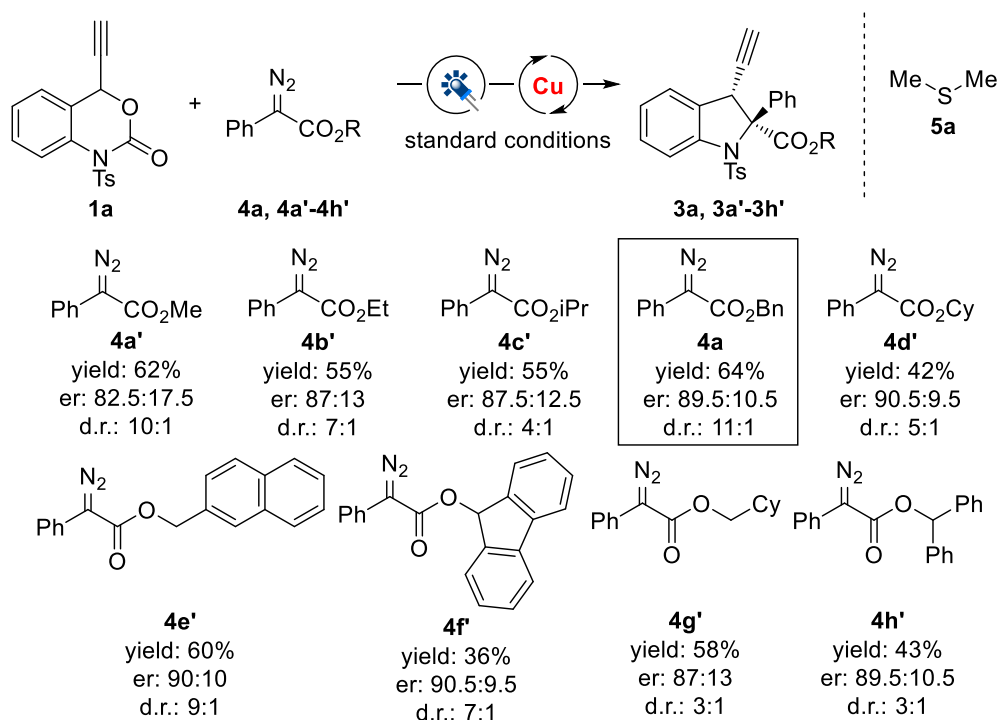

<sup>a</sup>Reaction conditions: **5a** (0.4 mmol), **4a, 4a'-4h'** (0.2 mmol) in 1 mL anhydrous toluene at r.t. under 6 W blue LEDs for 6 h; then the resulting solution of **4a, 4a'-4h'** together with **1a** (0.1 mmol) were added to the pre-prepared solution of Cu(OTf)<sub>2</sub> (10 mol%), ligand (15 mol%) and <sup>i</sup>Pr<sub>2</sub>NEt (0.12 mmol) in 1 mL anhydrous THF at 0 °C. <sup>b</sup>Yield of isolated product. <sup>c</sup>The diastereomeric ratios were determined by <sup>1</sup>H NMR spectroscopic analysis. <sup>d</sup>The er values were determined by HPLC.

**Table S4** The effect of copper salts<sup>a</sup>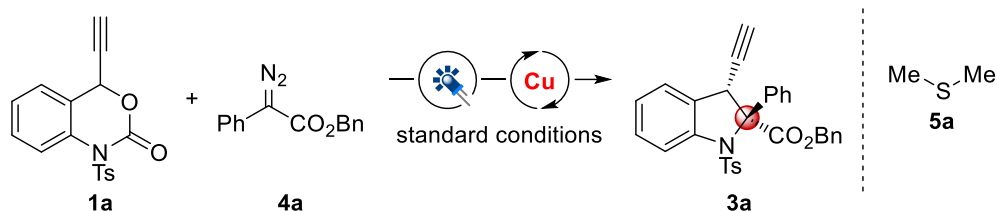

| Entry | Copper salts                          | Yield (%) <sup>b</sup> | d.r. <sup>c</sup> | e.r. <sup>d</sup> |
|-------|---------------------------------------|------------------------|-------------------|-------------------|
| 1     | Cu(OTf) <sub>2</sub>                  | 64                     | 11:1              | 89.5:10.5         |
| 2     | CuI                                   | 58                     | 9:1               | 87.5:12.5         |
| 3     | Cu(MeCN) <sub>4</sub> BF <sub>4</sub> | 58                     | 9:1               | 89.5:10.5         |
| 4     | Cu(MeCN) <sub>4</sub> PF <sub>6</sub> | 59                     | 10:1              | 91:9              |
| 5     | CuOTf·Tol1/2                          | 55                     | 15:1              | 89.5:10.5         |

<sup>a</sup>Reaction conditions: **5a** (0.4 mmol), **4a** (0.2 mmol) in 1 mL anhydrous toluene at r.t. under 6 W blue LEDs for 6 h; then the resulting solution of **4a** together with **1a** (0.1 mmol) were added to the pre-prepared solution of copper salts (10 mol%), ligand (15 mol%) and <sup>i</sup>Pr<sub>2</sub>NEt (0.12 mmol) in 1 mL anhydrous THF at 0 °C. <sup>b</sup>Yield of isolated product. <sup>c</sup>The diastereomeric ratios were determined by <sup>1</sup>H NMR spectroscopic analysis. <sup>d</sup>The er values were determined by HPLC.

**Table S5** The effect of solvent<sup>a</sup>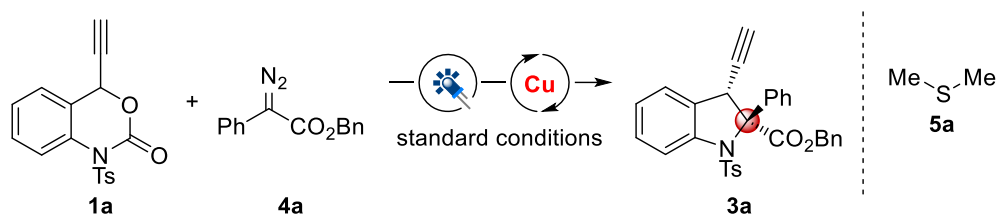

| Entry          | Solvent              | Yield (%) <sup>b</sup> | d.r. <sup>c</sup> | e.r. <sup>d</sup> |
|----------------|----------------------|------------------------|-------------------|-------------------|
| 1              | THF                  | 59                     | 10:1              | 91:9              |
| 2              | Et <sub>2</sub> O    | 57                     | 4:1               | 87:13             |
| 3              | DCM                  | 62                     | 10:1              | 90:10             |
| 4              | 1,4-Dioxane          | 78                     | 9:1               | 88.5:11.5         |
| 5              | Acetone              | 52                     | 10:1              | 91.5:8.5          |
| 6 <sup>e</sup> | 4-methyl-2-pentanone | 56                     | 13:1              | 93:7              |

<sup>a</sup>Reaction conditions: **5a** (0.4 mmol), **4a** (0.2 mmol) in 1 mL anhydrous toluene at r.t. under 6 W blue LEDs for 6 h; then the resulting solution of **4a** together with **1a** (0.1 mmol) were added to the pre-prepared solution of Cu(MeCN)<sub>4</sub>PF<sub>6</sub> (10 mol%), ligand (15 mol%) and <sup>i</sup>Pr<sub>2</sub>NEt (0.12 mmol) in 1 mL anhydrous solvent at 0 °C. <sup>b</sup>Yield of isolated product. <sup>c</sup>The diastereomeric ratios were determined by <sup>1</sup>H NMR spectroscopic analysis. <sup>d</sup>The ee values were determined by HPLC. <sup>e</sup>**5a** (0.4 mmol), **4a** (0.2 mmol) in 1 mL anhydrous 4-methyl-2-pentanone at r.t. under 6 W blue LEDs for 6 h; then the resulting solution of **4a** together with **1a** (0.1 mmol) were added to the pre-prepared solution of Cu(MeCN)<sub>4</sub>PF<sub>6</sub> (10 mol%), ligand (15 mol%) and <sup>i</sup>Pr<sub>2</sub>NEt (0.12 mmol) in 1 mL anhydrous 4-methyl-2-pentanone at 0 °C.

**Table S6 The effect of temperature<sup>a</sup>**

| Entry | Temperature (°C) | Time | Yield (%) <sup>b</sup> | d.r. <sup>c</sup> | e.r. <sup>d</sup> |
|-------|------------------|------|------------------------|-------------------|-------------------|
| 1     | 0                | 12 h | 56                     | 13:1              | 93:7              |
| 2     | -10              | 16 h | 64                     | 13:1              | 94:6              |
| 3     | -20              | 60 h | 83                     | 16:1              | 94:6              |

<sup>a</sup>Reaction conditions: **4a** (0.4 mmol), **2a** (0.2 mmol) in 1 mL anhydrous 4-methyl-2-pentanone at r.t. under 6 W blue LEDs for 6 h; then the resulting solution of **4a** together with **1a** (0.1 mmol) were added to the pre-prepared solution of Cu(MeCN)<sub>4</sub>PF<sub>6</sub> (10 mol%), ligand (15 mol%) and <sup>i</sup>Pr<sub>2</sub>NEt (0.12 mmol) in 1 mL anhydrous 4-methyl-2-pentanone at indicated temperature. <sup>b</sup>Yield of isolated product. <sup>c</sup>The diastereomeric ratios were determined by <sup>1</sup>H NMR spectroscopic analysis. <sup>d</sup>The er values were determined by HPLC.



**Table S7** The effect of concentration<sup>a</sup>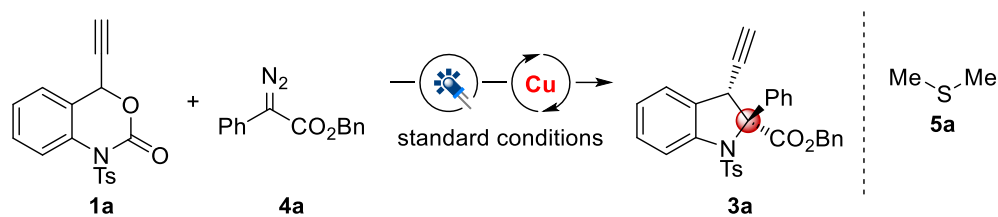

| Entry | Concentration | Yield (%) <sup>b</sup> | d.r. <sup>c</sup> | e.r. <sup>d</sup> |
|-------|---------------|------------------------|-------------------|-------------------|
| 1     | 1 mL          | 57                     | 13:1              | 91.5:8.5          |
| 2     | 2 mL          | 83                     | 16:1              | 94:6              |
| 3     | 3 mL          | 82                     | 19:1              | 95:5              |
| 4     | 4 mL          | 75                     | 19:1              | 94.5:5.5          |

<sup>a</sup>Reaction conditions: **4a** (0.4 mmol), **2a** (0.2 mmol) in 1 mL anhydrous 4-methyl-2-pentanone at r.t. under 6 W blue LEDs for 6 h; then the resulting solution of **4a** together with **1a** (0.1 mmol) were added to the pre-prepared solution of Cu(MeCN)<sub>4</sub>PF<sub>6</sub> (10 mol%), ligand (15 mol%) and <sup>1</sup>Pr<sub>2</sub>NEt (0.12 mmol) in X mL anhydrous 4-methyl-2-pentanone at indicated temperature. <sup>b</sup>Yield of isolated product. <sup>c</sup>The diastereomeric ratios were determined by <sup>1</sup>H NMR spectroscopic analysis. <sup>d</sup>The e.r. values were determined by HPLC.

### 3. General Procedures and Characterization Data of Products

#### 3.1 General Procedures

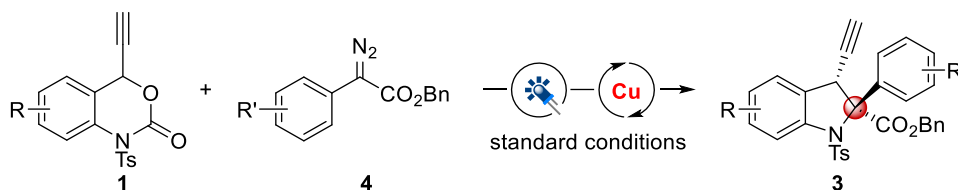

**General procedure** (one-pot procedure with product **3a** as an example): Under argon atmosphere, a flame-dried 10 mL Schlenk tube was charged with dimethyl sulfide (0.4 mmol, 4.0 equiv),  $\alpha$ -diazo ketesters (0.2 mmol, 2.0 equiv) and anhydrous 4-Methyl-2-pentanone (1 mL). The resulting solution was stirred for 6 h at room temperature. To another flame-dried 10 mL Schlenk tube,  $\text{Cu}(\text{MeCN})_4\text{PF}_6$  (0.01 mmol, 10 mol%), L (0.015 mmol, 15 mol%) and anhydrous 4-Methyl-2-pentanone (1 mL) were added and the resulting solution was stirred for 30 min at room temperature. Then, the reaction mixture was cooled to  $-20\text{ }^\circ\text{C}$ , after that, the reaction solution in the first Schlenk were moved to the second one and ethynyl benzoxazinanes (0.1 mmol),  $i\text{-Pr}_2\text{NEt}$  (0.12 mmol, 1.2 eq.) and anhydrous 4-Methyl-2-pentanone (1 mL) were added sequentially. The resulting solution was stirred until complete conversion of ethynyl benzoxazinanes (monitored by TLC). 4-Methyl-2-pentanone was removed under the reduced pressure and the residue was purified by flash column chromatography on silica gel (petrol ether/ethyl acetate = 20/1 to 10/1) to afford the product.

#### 3.2 Characterization Data of Products

##### Benzyl (2S,3S)-3-ethynyl-2-phenyl-1-tosylindoline-2-carboxylate (**3a**)

82% isolated yield, colorless oil,  $[\alpha]_{\text{D}}^{25} = 3.60$  ( $c = 0.75$  in  $\text{CHCl}_3$ ); 95:5 er, 19:1 d.r., determined by HPLC analysis (Chiralpak AD-H column, hexane/ $i\text{-PrOH}$ , 80:20 v/v, flow rate 0.5 mL/min,  $\lambda = 254$  nm,  $25\text{ }^\circ\text{C}$ ),  $t_{\text{R}}$  (major) = 48.32 min,  $t_{\text{R}}$  (minor) = 50.86 min;  $^1\text{H NMR}$  (400 MHz,  $\text{CDCl}_3$ )  $\delta = 7.75 - 7.65$  (m, 2H), 7.51 - 7.43 (m, 1H), 7.32 - 7.27 (m, 4H), 7.26 - 7.21 (m, 8H), 7.08 - 7.02 (m, 1H), 6.99 (d,  $J = 8.1$  Hz, 2H), 5.32 (d,  $J = 12.7$  Hz, 1H), 5.22 (d,  $J = 12.6$  Hz, 1H), 4.82 - 4.75 (m, 1H), 2.29 (m, 4H);  $^{13}\text{C NMR}$  (100 MHz,  $\text{CDCl}_3$ )  $\delta$  167.8, 143.6, 141.5, 139.6, 137.0, 135.1, 129.2, 129.1, 128.2, 128.2, 128.2, 128.0, 128.0, 127.8, 127.2, 127.0, 124.7, 123.1, 113.0, 79.6, 79.4, 75.0, 67.5, 50.1, 21.4. **HRMS** (ESI) for  $\text{C}_{31}\text{H}_{25}\text{NO}_4\text{S}$   $[\text{M}+\text{Na}]^+$ : calcd 530.1397, found 530.1390.

##### Benzyl (2S,3S)-3-ethynyl-2-(p-tolyl)-1-tosylindoline-2-carboxylate (**3b**)

60% isolated yield, colorless oil,  $[\alpha]_{\text{D}}^{25} = 26.10$  ( $c = 0.99$  in  $\text{CHCl}_3$ ); 91.5:8.5 er, 7:1 d.r., determined by HPLC analysis (Chiralpak AD-H column, hexane/ $i\text{-PrOH}$ , 80:20 v/v, flow rate 1.0 mL/min,  $\lambda = 254$  nm,  $25\text{ }^\circ\text{C}$ ),  $t_{\text{R}}$  (major) = 23.40 min,  $t_{\text{R}}$  (minor) = 44.10 min;  $^1\text{H NMR}$  (400 MHz,  $\text{CDCl}_3$ )  $\delta$  7.51 - 7.44 (m, 2H), 7.41 - 7.35 (m, 1H), 7.23 - 7.18 (m, 4H), 7.18 - 7.13 (m, 5H), 7.00 - 6.93 (m, 3H), 6.93 - 6.87 (m, 2H), 5.24 (d,  $J = 12.6$  Hz, 1H), 5.13 (d,  $J = 12.7$  Hz, 1H), 4.72 - 4.66 (m, 1H), 2.26 (s, 3H), 2.23 - 2.18 (m, 4H);  $^{13}\text{C NMR}$  (100 MHz,  $\text{CDCl}_3$ )  $\delta$  167.9, 143.5, 141.6, 138.1, 137.1, 136.6, 135.1, 129.2, 129.0, 128.5, 128.1, 128.1, 128.0, 127.8, 127.2, 127.1,

124.7, 123.1, 113.1, 79.6, 79.5, 74.9, 67.5, 50.0, 21.4, 21.0. **HRMS** (ESI) for C<sub>12</sub>H<sub>27</sub>NO<sub>4</sub>S [M+Na]<sup>+</sup>: calcd 544.1553, found 544.1550.

### Benzyl (2S,3S)-3-ethynyl-2-(4-fluorophenyl)-1-tosylindoline-2-carboxylate (3c)

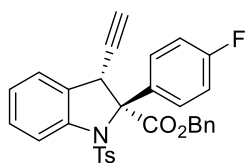

78% isolated yield, colorless oil,  $[\alpha]_{\text{D}}^{25} = -3.33$  ( $c = 0.91$  in CHCl<sub>3</sub>); 94.5:5.5 er, 19:1 d.r., determined by HPLC analysis (Chiralpak AD-H column, hexane/*i*-PrOH, 80:20 v/v, flow rate 1.0 mL/min,  $\lambda = 254$  nm, 25 °C), tR (major) = 19.19 min, tR (minor) = 24.35 min; **<sup>1</sup>H NMR** (400 MHz, CDCl<sub>3</sub>)  $\delta$  7.70 (dd,  $J = 8.7, 5.2$  Hz, 2H), 7.53 – 7.45 (m, 1H), 7.34 – 7.28 (m, 3H), 7.28 – 7.22 (m, 4H), 7.22 – 7.16 (m, 2H), 7.10 – 6.98 (m, 3H), 6.93 (t,  $J = 8.5$  Hz, 2H), 5.30 (d,  $J = 12.7$  Hz, 1H), 5.18 (d,  $J = 12.7$  Hz, 1H), 4.71 (d,  $J = 2.5$  Hz, 1H), 2.30 – 2.27 (m, 4H); **<sup>13</sup>C NMR** (100 MHz, CDCl<sub>3</sub>)  $\delta$  168.0, 162.3 (d,  $J = 248.5$  Hz), 144.2, 141.8, 137.3, 135.8, (d,  $J = 3.4$  Hz) 135.2, 130.5 (d,  $J = 8.1$  Hz), 129.6, 129.5, 128.5, 128.3, 128.2, 127.4, 127.1, 125.1, 123.6, 115.0 (d,  $J = 21.4$  Hz), 113.4, 79.4, 75.5, 67.9, 50.6, 21.7; **<sup>19</sup>F NMR** (376 MHz, CDCl<sub>3</sub>)  $\delta = -113.64$ . **HRMS** (ESI) for C<sub>31</sub>H<sub>24</sub>FNO<sub>4</sub>S [M+Na]<sup>+</sup>: calcd 548.1302, found 548.1309.

### Benzyl (2S,3S)-2-(4-chlorophenyl)-3-ethynyl-1-tosylindoline-2-carboxylate (3d)

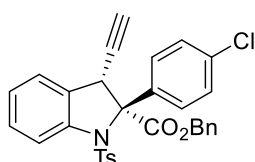

84% isolated yield, white semi-solid,  $[\alpha]_{\text{D}}^{25} = 32.93$  ( $c = 1.0$  in CHCl<sub>3</sub>); 95:5 er, 17:1 d.r., determined by HPLC analysis (Chiralpak AD-H column, hexane/*i*-PrOH, 80:20 v/v, flow rate 1.0 mL/min,  $\lambda = 254$  nm, 25 °C), tR (major) = 18.02 min, tR (minor) = 33.51 min; **<sup>1</sup>H NMR** (400 MHz, CDCl<sub>3</sub>)  $\delta$  7.66 – 7.61 (m, 2H), 7.54 – 7.49 (m, 1H), 7.25 – 7.21 (m, 3H), 7.21 – 7.17 (m, 3H), 7.09 – 6.98 (m, 3H), 6.97 – 6.87 (m, 1H), 7.04 (dd,  $J = 22.0, 7.8$  Hz, 3H), 6.97 – 6.86 (m, 1H), 5.28 (d,  $J = 12.7$  Hz, 1H), 5.16 (d,  $J = 12.4$  Hz, 1H), 4.69 – 4.65 (m,  $J = 2.5$  Hz, 1H), 2.30 (s, 1H), 2.29 (s, 3H); **<sup>13</sup>C NMR** (100 MHz, CDCl<sub>3</sub>)  $\delta$  167.5, 143.9, 141.5, 138.0, 136.9, 134.9, 134.3, 129.6, 129.3, 129.2, 128.2, 128.0, 127.9, 127.9, 127.0, 126.7, 124.7, 123.3, 113.1, 79.0, 78.9, 75.2, 67.6, 50.1, 21.5. **HRMS** (ESI) for C<sub>31</sub>H<sub>24</sub>ClNO<sub>4</sub>S [M+Na]<sup>+</sup>: calcd 564.1007, found 564.1011.

### Benzyl (2S,3S)-2-(4-bromophenyl)-3-ethynyl-1-tosylindoline-2-carboxylate (3e)

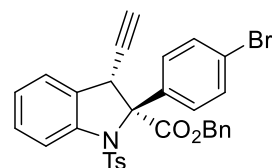

77% isolated yield, white solid,  $[\alpha]_{\text{D}}^{25} = 22.43$  ( $c = 0.86$  in CHCl<sub>3</sub>); 94.5:5.5 er, 18:1 d.r., determined by HPLC analysis (Chiralpak AD-H column, hexane/*i*-PrOH, 80:20 v/v, flow rate 1.0 mL/min,  $\lambda = 254$  nm, 25 °C), tR (major) = 18.68 min, tR (minor) = 39.75 min; **<sup>1</sup>H NMR** (400 MHz, CDCl<sub>3</sub>)  $\delta$  7.62 – 7.49 (m, 3H), 7.38 – 7.27 (m, 6H), 7.26 – 7.21 (m, 3H), 7.21 – 7.14 (m, 2H), 7.12 – 6.99 (m, 3H), 5.29 (d,  $J = 12.7$  Hz, 1H), 5.16 (d,  $J = 12.7$  Hz, 1H), 4.70 – 4.64 (m, 1H), 2.31 (s, 3H), 2.29 (d,  $J = 2.6$  Hz, 1H); **<sup>13</sup>C NMR** (100 MHz, CDCl<sub>3</sub>)  $\delta$  167.5, 143.9, 141.6, 138.5, 137.0, 134.9, 130.9, 129.9, 129.4, 129.2, 128.2, 127.9, 127.9, 127.0, 126.7, 124.7, 123.3, 122.5, 113.1, 79.0, 78.9, 75.2, 67.6, 50.1, 21.5. **HRMS** (ESI) for C<sub>31</sub>H<sub>24</sub>BrNO<sub>4</sub>S [M+Na]<sup>+</sup>: calcd 608.0502, found 608.0503.

### Benzyl (2S,3S)-3-ethynyl-1-tosyl-2-(4-(trifluoromethyl)phenyl)indoline-2-carboxylate (3f)

63% isolated yield, colorless oil,  $[\alpha]_{\text{D}}^{25} = 2.97$  ( $c = 0.97$  in CHCl<sub>3</sub>); 90:10 er, 19:1 d.r., determined by HPLC analysis (Chiralpak AD-H column, hexane/*i*-PrOH, 80:20 v/v, flow rate 1.0 mL/min,  $\lambda = 210$

nm, 25 °C), tR (major) = 12.64 min, tR (minor) = 31.82 min; **<sup>1</sup>H NMR** (400 MHz, CDCl<sub>3</sub>) δ 7.88 – 7.82 (m, 2H), 7.56 – 7.55 (m, 1H), 7.50 – 7.45 (m, 2H), 7.33 – 7.26 (m, 4H), 7.26 – 7.21 (m, 3H), 7.20 – 7.13 (m, 2H), 7.12 – 7.05 (m, 1H), 7.02 – 6.95 (m, 2H), 5.29 (d, *J* = 12.6 Hz, 1H), 5.16 (d, *J* = 12.7 Hz, 1H), 4.71 – 4.65 (m, 1H), 2.31 (d, *J* = 2.6 Hz, 1H), 2.29 (s, 3H); **<sup>13</sup>C NMR** (100 MHz, CDCl<sub>3</sub>) δ 167.3, 144.0, 143.3, 141.6, 136.8, 134.8, 130.4, 130.1, 129.5, 129.4, 129.2, 128.6, 128.6, 128.2, 127.9, 126.9, 126.7, 124.8 (q, *J* = 3.7 Hz), 123.5, 113.2, 78.9, 78.7, 75.3, 67.7, 50.2, 21.4; **<sup>19</sup>F NMR** (376 MHz, CDCl<sub>3</sub>) δ = -62.77. **HRMS** (ESI) for C<sub>32</sub>H<sub>21</sub>F<sub>3</sub>NO<sub>2</sub>S [M+Na]<sup>+</sup>: calcd 598.1270, found 598.1259.

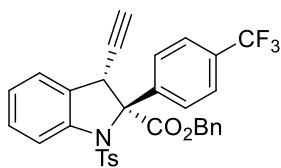

### Benzyl (2S,3S)-2-((1,1'-biphenyl)-4-yl)-3-ethynyl-1-tosylindoline-2-carboxylate (3g)

59% isolated yield, white solid, [α]<sub>D</sub><sup>25</sup> = 6.60 (c = 0.31 in CHCl<sub>3</sub>); 91:9 er, 13:1 d.r., determined by HPLC analysis (Chiralpak IC-H column, hexane/*i*-PrOH, 80:20 v/v, flow rate 1.0 mL/min, λ = 254 nm, 25 °C), tR (major) = 75.95 min, tR (minor) = 32.13 min; **<sup>1</sup>H NMR** (400 MHz, CDCl<sub>3</sub>) δ 7.78 – 7.71 (m, 2H), 7.60 – 7.48 (m, 3H), 7.49–7.42 (m, 4H), 7.40 – 7.34 (m, 1H), 7.33 – 7.23 (m, 9H), 7.12 – 7.04 (m, 1H), 6.99 – 6.92 (m, 2H), 5.34 (d, *J* = 12.6 Hz, 1H), 5.25 (d, *J* = 12.6 Hz, 1H), 4.87 – 4.80 (m, 1H), 2.31 (d, *J* = 2.6 Hz, 1H), 2.27 (s, 3H); **<sup>13</sup>C NMR** (100 MHz, CDCl<sub>3</sub>) δ 167.9, 143.6, 141.0, 140.3, 138.4, 137.1, 135.1, 129.3, 129.1, 128.8, 128.7, 128.2, 128.0, 127.8, 127.6, 127.1, 127.0, 126.5, 124.8, 123.2, 113.1, 79.3, 79.3, 75.0, 67.6, 50.1, 21.4. **HRMS** (ESI) for C<sub>37</sub>H<sub>29</sub>NO<sub>4</sub>S [M+Na]<sup>+</sup>: calcd 606.1710, found 606.1700.

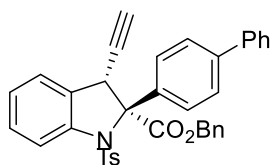

### Benzyl (2S,3S)-3-ethynyl-2-(m-tolyl)-1-tosylindoline-2-carboxylate (3h)

74% isolated yield, colorless oil, [α]<sub>D</sub><sup>25</sup> = -5.90 (c = 1.02 in CHCl<sub>3</sub>); 91.5:8.5 er, 12:1 d.r., determined by HPLC analysis (Chiralpak AD-H column, hexane/*i*-PrOH, 80:20 v/v, flow rate 1.0 mL/min, λ = 254 nm, 25 °C), tR (major) = 14.85 min, tR (minor) = 18.98 min; **<sup>1</sup>H NMR** δ 7.62 – 7.57 (m, 1H), 7.55 – 7.50 (m, 1H), 7.34 (s, 1H), 7.32 – 7.26 (m, 2H), 7.25 – 7.20 (m, 7H), 7.19 – 7.12 (m, 1H), 7.11 – 7.03 (m, 2H), 7.01 – 6.95 (m, 2H), 5.33 (d, *J* = 12.7 Hz, 1H), 5.22 (d, *J* = 12.7 Hz, 1H), 4.80 – 4.74 (m, 1H), 2.31 – 2.27 (m, 4H), 2.18 (s, 3H); **<sup>13</sup>C NMR** δ 168.2, 143.8, 142.0, 139.5, 137.8, 137.4, 135.5, 129.5, 129.3, 129.2, 129.1, 128.5, 128.2, 128.2, 128.1, 127.4, 127.4, 125.8, 125.0, 123.4, 113.3, 79.8, 79.6, 75.3, 67.7, 50.6, 21.7, 21.7. **HRMS** (ESI) for C<sub>32</sub>H<sub>27</sub>NO<sub>4</sub>S [M+Na]<sup>+</sup>: calcd 544.1553, found 544.1558.

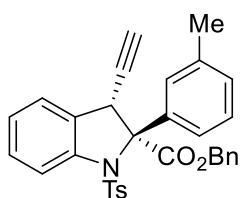

### Benzyl (2S,3S)-3-ethynyl-2-(3-fluorophenyl)-1-tosylindoline-2-carboxylate (3i)

83% isolated yield, colorless oil, [α]<sub>D</sub><sup>25</sup> = 1.18 (c = 0.91 in CHCl<sub>3</sub>); 92:8 er, 12:1 d.r., determined by HPLC analysis (Chiralpak AD-H column, hexane/*i*-PrOH, 80:20 v/v, flow rate 0.5 mL/min, λ = 220 nm, 25 °C), tR (major) = 39.77 min, tR (minor) = 37.77 min; **<sup>1</sup>H NMR** (400 MHz, CDCl<sub>3</sub>) δ 7.54 – 7.46 (m, 3H), 7.39 – 7.33 (m, 2H), 7.33 – 7.26 (m, 2H), 7.25 – 7.15 (m, 6H), 7.10 – 6.96 (m, 4H), 5.29 (d, *J* = 12.7 Hz, 1H), 5.16 (d, *J* = 12.7 Hz, 1H), 4.70 – 4.65 (m, 1H), 2.32 – 2.27 (m, 4H); **<sup>13</sup>C NMR** (100 MHz, CDCl<sub>3</sub>) δ 167.4, 162.21 (d, *J* = 1.9 Hz), 143.9, 142.0 (d, *J* = 7.4 Hz), 141.6, 136.9, 134.9, 129.4 (d, *J* = 8.2 Hz), 129.2, 128.2, 127.9, 127.8, 127.1, 126.8, 124.7, 123.7, 123.7 (d, *J* = 2.9 Hz),

123.3, 115.7 (d,  $J = 24.3$  Hz), 115.1 (d,  $J = 21.0$  Hz), 113.1, 79.0 (d,  $J = 1.9$  Hz), 78.8, 75.22, 67.6, 50.3, 21.5;  $^{19}\text{F}$  NMR (376 MHz,  $\text{CDCl}_3$ )  $\delta = -112.40$ . HRMS (ESI) for  $\text{C}_{31}\text{H}_{24}\text{FNO}_4\text{S}$   $[\text{M}+\text{Na}]^+$ : calcd 548.1302, found 548.1308.

### Benzyl (2S,3S)-2-(3-chlorophenyl)-3-ethynyl-1-tosylindoline-2-carboxylate (3j)

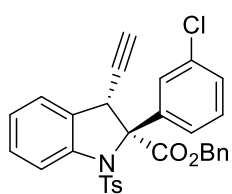

62% isolated yield, white solid,  $[\alpha]_{\text{D}}^{25} = -49.90$  ( $c = 1.0$  in  $\text{CHCl}_3$ ); 91.5:8.5 er, 14:1 d.r., determined by HPLC analysis (Chiralpak AD-H column, hexane/*i*-PrOH, 80:20 v/v, flow rate 1.0 mL/min,  $\lambda = 254$  nm, 25 °C), tR (major) = 15.96 min, tR (minor) = 17.34 min;  $^1\text{H}$  NMR (400 MHz,  $\text{CDCl}_3$ )  $\delta$  7.72 – 7.67 (m, 1H), 7.51 – 7.46 (m, 2H), 7.28 – 7.23 (m, 3H), 7.20 – 7.14 (m, 6H), 7.13 – 7.08 (m, 2H), 7.02 – 6.95 (m, 3H), 5.23 (d,  $J = 12.7$  Hz, 1H), 5.10 (d,  $J = 12.7$  Hz, 1H), 4.61 – 4.55 (m, 1H), 2.24 (s, 3H), 2.23 (d,  $J = 2.6$  Hz, 1H);  $^{13}\text{C}$  NMR (100 MHz,  $\text{CDCl}_3$ )  $\delta$  167.4, 144.0, 141.3, 136.9, 134.9, 133.9, 129.3, 129.3, 129.3, 129.2, 128.3, 128.2, 127.9, 127.8, 126.9, 126.7, 126.5, 124.7, 123.3, 113.1, 78.9, 78.7, 75.3, 67.6, 50.4, 21.5. HRMS (ESI) for  $\text{C}_{31}\text{H}_{24}\text{ClNO}_4\text{S}$   $[\text{M}+\text{Na}]^+$ : calcd 564.1007, found 564.1011.

### Benzyl (2S,3S)-2-(3,4-dichlorophenyl)-3-ethynyl-1-tosylindoline-2-carboxylate (3k)

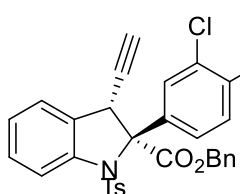

72% isolated yield, colorless oil,  $[\alpha]_{\text{D}}^{25} = -7.30$  ( $c = 0.92$  in  $\text{CHCl}_3$ ); 91.5:8.5 er, 19:1 d.r., determined by HPLC analysis (Chiralpak AD-H column, hexane/*i*-PrOH, 80:20 v/v, flow rate 0.5 mL/min,  $\lambda = 254$  nm, 25 °C), tR (major) = 25.68 min, tR (minor) = 41.50 min;  $^1\text{H}$  NMR (400 MHz,  $\text{CDCl}_3$ )  $\delta$  7.71 (dd,  $J = 8.6, 2.3$  Hz, 1H), 7.67 – 7.64 (m, 1H), 7.62 – 7.57 (m, 1H), 7.40 – 7.34 (m, 2H), 7.34 – 7.21 (m, 6H), 7.18 – 7.12 (m, 2H), 7.11 – 7.01 (m, 3H), 5.28 (d,  $J = 12.6$  Hz, 1H), 5.14 (d,  $J = 12.6$  Hz, 1H), 4.63 – 4.59 (m, 1H), 2.33 (s, 3H), 2.30 (d,  $J = 2.5$  Hz, 1H);  $^{13}\text{C}$  NMR (100 MHz,  $\text{CDCl}_3$ )  $\delta$  167.2, 144.2, 141.7, 139.4, 137.0, 134.8, 132.5, 132.1, 130.2, 129.7, 129.5, 129.3, 128.2, 127.9, 127.9, 127.7, 126.7, 126.5, 124.8, 123.5, 113.2, 78.4, 75.5, 67.7, 50.3, 21.5. HRMS (ESI) for  $\text{C}_{31}\text{H}_{23}\text{Cl}_2\text{NO}_4\text{S}$   $[\text{M}+\text{Na}]^+$ : calcd 598.0617, found 598.0624.

### Benzyl (2S,3S)-3-ethynyl-2-(naphthalen-2-yl)-1-tosylindoline-2-carboxylate (3l)

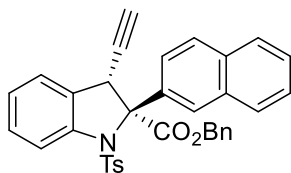

54% isolated yield, white solid,  $[\alpha]_{\text{D}}^{25} = 26.60$  ( $c = 0.94$  in  $\text{CHCl}_3$ ); 90:10 er, 9:1 d.r., determined by HPLC analysis (Chiralpak AD-H column, hexane/*i*-PrOH, 70:30 v/v, flow rate 1.0 mL/min,  $\lambda = 254$  nm, 25 °C), tR (major) = 25.77 min, tR (minor) = 45.25 min;  $^1\text{H}$  NMR (400 MHz,  $\text{CDCl}_3$ )  $\delta$  8.33 (d,  $J = 1.9$  Hz, 1H), 7.80 – 7.75 (m, 1H), 7.74 – 7.70 (m, 1H), 7.65 – 7.56 (m, 3H), 7.53 – 7.43 (m, 2H), 7.36 – 7.29 (m, 2H), 7.25 (s, 5H), 7.18 (d,  $J = 8.2$  Hz, 2H), 7.09 (t,  $J = 7.5$  Hz, 1H), 6.78 (d,  $J = 8.1$  Hz, 2H), 5.37 (d,  $J = 12.6$  Hz, 1H), 5.25 (d,  $J = 12.7$  Hz, 1H), 4.87 (d,  $J = 2.6$  Hz, 1H), 2.30 (d,  $J = 2.6$  Hz, 1H), 2.20 (s, 3H);  $^{13}\text{C}$  NMR (100 MHz,  $\text{CDCl}_3$ )  $\delta$  167.9, 143.5, 141.9, 137.1, 136.2, 135.2, 132.8, 132.5, 129.3, 129.0, 128.9, 128.2, 128.0, 127.8, 127.6, 127.1, 127.1, 126.9, 126.7, 126.1, 125.4, 124.8, 123.2, 113.2, 79.6, 79.2, 75.0, 67.5, 50.2, 21.3. HRMS (ESI) for  $\text{C}_{35}\text{H}_{27}\text{NO}_4\text{S}$   $[\text{M}+\text{Na}]^+$ : calcd 580.1553, found 580.1551.

### Benzyl (2S,3S)-3-ethynyl-4-fluoro-2-phenyl-1-tosylindoline-2-carboxylate (3m)

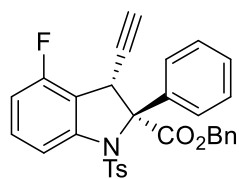

82% isolated yield, colorless oil,  $[\alpha]_D^{25} = 29.13$  ( $c = 0.98$  in  $\text{CHCl}_3$ ); 95:5 er, 10:1 d.r., determined by HPLC analysis (Chiralpak AZ-H column, hexane/*i*-PrOH, 80:20 v/v, flow rate 1.0 mL/min,  $\lambda = 254$  nm, 25 °C), tR (major) = 24.16 min, tR (minor) = 36.40 min;  $^1\text{H NMR}$  (400 MHz,  $\text{CDCl}_3$ )  $\delta$  7.70 – 7.63 (m, 2H), 7.37 – 7.31 (m, 3H), 7.31 – 7.26 (m, 6H), 7.24 – 7.15 (m, 2H), 7.02 – 6.95 (m, 2H), 6.78 – 6.69 (m, 1H), 5.35 (d,  $J = 12.5$  Hz, 1H), 5.29 (d,  $J = 12.5$  Hz, 1H), 4.86 – 4.81 (m, 1H), 2.32 (d,  $J = 2.6$  Hz, 1H), 2.29 (s, 3H);  $^{13}\text{C NMR}$  (100 MHz,  $\text{CDCl}_3$ )  $\delta$  167.6, 158.8 (d,  $J = 250.0$  Hz), 143.8, 143.7 (d,  $J = 6.9$  Hz), 139.4, 136.6, 135.0, 131.3 (d,  $J = 8.6$  Hz), 129.2, 128.5, 128.4, 128.3, 128.1, 128.0, 128.0, 127.4, 113.4 (d,  $J = 19.9$  Hz), 110.2 (d,  $J = 19.5$  Hz), 108.9 (d,  $J = 3.3$  Hz), 80.6, 78.0, 75.1, 67.9, 46.5, 21.5;  $^{19}\text{F NMR}$  (376 MHz,  $\text{CDCl}_3$ )  $\delta = -117.26$ . HRMS (ESI) for  $\text{C}_{31}\text{H}_{24}\text{FNO}_4\text{S}$   $[\text{M}+\text{Na}]^+$ : calcd 548.1302, found 548.1302.

### Benzyl (2S,3S)-3-ethynyl-5-methyl-2-phenyl-1-tosylindoline-2-carboxylate (3n)

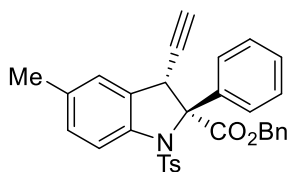

61% isolated yield, colorless oil,  $[\alpha]_D^{25} = 0.57$  ( $c = 1.05$  in  $\text{CHCl}_3$ ); 93.5:6.5 er, 9:1 d.r., determined by HPLC analysis (Chiralpak AD-H column, hexane/*i*-PrOH, 80:20 v/v, flow rate 1.0 mL/min,  $\lambda = 254$  nm, 25 °C), tR (major) = 75.26 min, tR (minor) = 80.24 min;  $^1\text{H NMR}$  (400 MHz,  $\text{CDCl}_3$ )  $\delta$  7.71 – 7.65 (m, 2H), 7.37 – 7.32 (m, 1H), 7.30 – 7.21 (m, 10H), 7.10 – 7.04 (m, 2H), 7.00 – 6.94 (m, 2H), 5.31 (d,  $J = 12.7$  Hz, 1H), 5.21 (d,  $J = 12.7$  Hz, 1H), 4.76 – 4.71 (m, 1H), 2.31 (s, 3H), 2.29 (d,  $J = 2.6$  Hz, 1H), 2.28 (s, 3H);  $^{13}\text{C NMR}$  (100 MHz,  $\text{CDCl}_3$ )  $\delta = 167.9$ , 143.5, 139.6, 139.3, 137.1, 135.1, 132.9, 129.7, 129.0, 128.3, 128.2, 128.1, 128.0, 127.9, 127.9, 127.2, 127.0, 125.2, 112.8, 79.8, 79.6, 74.9, 67.5, 50.1, 21.4, 20.7. HRMS (ESI) for  $\text{C}_{32}\text{H}_{27}\text{NO}_4\text{S}$   $[\text{M}+\text{Na}]^+$ : calcd 544.1553, found 544.1553.

### Benzyl (2S,3S)-5-chloro-3-ethynyl-2-phenyl-1-tosylindoline-2-carboxylate (3o)

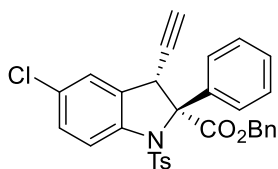

63% isolated yield, colorless oil,  $[\alpha]_D^{25} = -11.07$  ( $c = 0.89$  in  $\text{CHCl}_3$ ); 91.5:8.5 er, 10:1 d.r., determined by HPLC analysis (Chiralpak AD-H column, hexane/*i*-PrOH, 80:20 v/v, flow rate 1.0 mL/min,  $\lambda = 254$  nm, 25 °C), tR (major) = 14.48 min, tR (minor) = 20.85 min;  $^1\text{H NMR}$  (400 MHz,  $\text{CDCl}_3$ )  $\delta$  7.70 – 7.63 (m, 2H), 7.44 – 7.38 (m, 1H), 7.34 – 7.26 (m, 6H), 7.25 – 7.17 (m, 6H), 7.04 – 6.97 (m, 2H), 5.32 (d,  $J = 12.6$  Hz, 1H), 5.20 (d,  $J = 12.6$  Hz, 1H), 4.78 – 4.71 (m, 1H), 2.33 – 2.27 (m, 4H);  $^{13}\text{C NMR}$  (100 MHz,  $\text{CDCl}_3$ )  $\delta = 167.5$ , 143.9, 140.3, 139.0, 136.6, 134.9, 129.2, 128.8, 128.4, 128.2, 128.1, 128.1, 128.0, 127.1, 124.9, 113.9, 80.0, 78.4, 75.6, 67.7, 49.7, 21.5. HRMS (ESI) for  $\text{C}_{31}\text{H}_{24}\text{ClNO}_4\text{S}$   $[\text{M}+\text{Na}]^+$ : calcd 564.1007, found 564.1003.

### Benzyl (2S,3S)-3-ethynyl-6-methyl-2-phenyl-1-tosylindoline-2-carboxylate (3p)

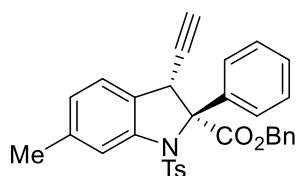

61% isolated yield, colorless oil,  $[\alpha]_D^{25} = 3.67$  ( $c = 0.88$  in  $\text{CHCl}_3$ ); 92.5:7.5 er, 6:1 d.r., determined by HPLC analysis (Chiralpak AD-H column, hexane/*i*-PrOH, 80:20 v/v, flow rate 0.5 mL/min,  $\lambda = 254$  nm, 25 °C), tR (major) = 31.58 min, tR (minor) = 45.35 min;  $^1\text{H NMR}$  (400 MHz,  $\text{CDCl}_3$ )  $\delta$  7.71 – 7.65 (m, 2H), 7.30 – 7.24 (m, 7H), 7.24 – 7.20 (m, 4H), 7.18 – 7.13 (m, 1H), 7.00 – 6.95 (m, 2H), 6.88 – 6.83 (m, 1H), 5.32 (d,  $J = 12.6$  Hz, 1H), 5.23 (d,  $J =$

12.6 Hz, 1H), 4.77 – 4.72 (m, 1H), 2.36 (s, 3H), 2.29 (s, 3H), 2.27 (d,  $J = 2.6$  Hz, 1H);  $^{13}\text{C}$  NMR (100 MHz,  $\text{CDCl}_3$ )  $\delta$  167.9, 143.5, 141.6, 139.7, 139.5, 137.1, 135.1, 129.1, 128.2, 128.2, 128.1, 127.9, 127.8, 127.2, 124.4, 124.2, 124.0, 113.7, 79.9, 79.7, 74.8, 67.6, 49.8, 21.9, 21.4. HRMS (ESI) for  $\text{C}_{32}\text{H}_{27}\text{NO}_4\text{S}$   $[\text{M}+\text{Na}]^+$ : calcd 544.1553, found 544.1555.

### Benzyl (2S,3S)-3-ethynyl-6-fluoro-2-phenyl-1-tosylindoline-2-carboxylate (3q)

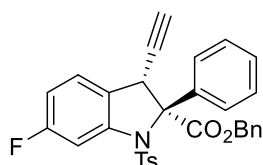

73% isolated yield, colorless oil,  $[\alpha]_{\text{D}}^{25} = 2.20$  ( $c = 0.74$  in  $\text{CHCl}_3$ ); 94:6 er, 11:1 d.r., determined by HPLC analysis (Chiralpak AD-H column, hexane/*i*-PrOH, 80:20 v/v, flow rate 1.0 mL/min,  $\lambda = 254$  nm, 25 °C), tR (major) = 14.89 min, tR (minor) = 21.56 min;  $^1\text{H}$  NMR (400 MHz,  $\text{CDCl}_3$ )  $\delta$  7.70 – 7.64 (m, 2H), 7.34 – 7.15 (m, 12H), 7.01 (d,  $J = 8.1$  Hz, 2H), 6.74 (td,  $J = 8.5, 2.3$  Hz, 1H), 5.33 (d,  $J = 12.6$  Hz, 1H), 5.24 (d,  $J = 12.6$  Hz, 1H), 4.78 – 4.72 (m, 1H), 2.31 (s, 3H), 2.29 (d,  $J = 2.6$  Hz, 1H);  $^{13}\text{C}$  NMR (100 MHz,  $\text{CDCl}_3$ )  $\delta$  167.6, 163.6 (d,  $J = 245.1$  Hz), 143.9, 142.9 (d,  $J = 12.0$  Hz), 139.0, 136.6, 135.0, 129.2, 128.4, 128.3, 128.2, 128.1, 128.0, 127.9, 127.2, 125.5 (d,  $J = 10.1$  Hz), 122.5 (d,  $J = 2.5$  Hz), 109.7 (d,  $J = 23.1$  Hz), 101.5 (d,  $J = 29.5$  Hz), 80.4, 79.0, 75.2, 67.7, 49.5, 21.5;  $^{19}\text{F}$  NMR (376 MHz,  $\text{CDCl}_3$ )  $\delta = -111.36$ . HRMS (ESI) for  $\text{C}_{31}\text{H}_{24}\text{FNO}_4\text{S}$   $[\text{M}+\text{Na}]^+$ : calcd 548.1302, found 548.1304.

### Benzyl (2S,3S)-6-chloro-3-ethynyl-2-phenyl-1-tosylindoline-2-carboxylate (3r)

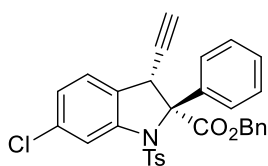

70% isolated yield, colorless oil,  $[\alpha]_{\text{D}}^{25} = 12.33$  ( $c = 1.33$  in  $\text{CHCl}_3$ ); 91:9 er, 11:1 d.r., determined by HPLC analysis (Chiralpak AD-H column, hexane/*i*-PrOH, 80:20 v/v, flow rate 1.0 mL/min,  $\lambda = 220$  nm, 25 °C), tR (major) = 14.20 min, tR (minor) = 20.74 min;  $^1\text{H}$  NMR (400 MHz,  $\text{CDCl}_3$ )  $\delta$  7.70 – 7.62 (m, 2H), 7.52 – 7.47 (m, 1H), 7.33 – 7.26 (m, 6H), 7.26 – 7.22 (m, 2H), 7.21 – 7.15 (m, 3H), 7.05 – 6.99 (m, 3H), 5.32 (d,  $J = 12.6$  Hz, 1H), 5.24 (d,  $J = 12.6$  Hz, 1H), 7.76 – 7.71 (m, 1H), 2.31 (s, 3H), 2.28 (d,  $J = 2.6$  Hz, 1H);  $^{13}\text{C}$  NMR (100 MHz,  $\text{CDCl}_3$ )  $\delta$  167.5, 144.0, 142.7, 139.0, 136.6, 135.1, 135.0, 129.3, 128.4, 128.3, 128.2, 128.1, 128.1, 127.9, 127.2, 125.7, 125.5, 123.2, 113.4, 80.1, 78.7, 75.4, 67.7, 49.6, 21.5. HRMS (ESI) for  $\text{C}_{31}\text{H}_{24}\text{ClNO}_4\text{S}$   $[\text{M}+\text{Na}]^+$ : calcd 564.1007, found 564.1057.

### Benzyl (2S,3S)-2-(4-bromophenyl)-3-ethynyl-4-fluoro-1-tosylindoline-2-carboxylate (3s)

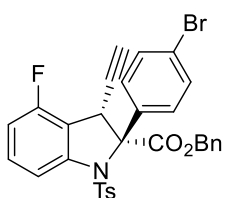

78% isolated yield, colorless oil,  $[\alpha]_{\text{D}}^{25} = 170.43$  ( $c = 1.0$  in  $\text{CHCl}_3$ ); 96:4 er, 15:1 d.r., determined by HPLC analysis (Chiralpak AZ-H column, hexane/*i*-PrOH, 75:25 v/v, flow rate 1.0 mL/min,  $\lambda = 220$  nm, 25 °C), tR (major) = 25.79 min, tR (minor) = 56.75 min;  $^1\text{H}$  NMR (400 MHz,  $\text{CDCl}_3$ )  $\delta$  7.56 – 7.51 (m, 2H), 7.38 – 7.32 (m, 4H), 7.32 – 7.28 (m, 5H), 7.24 – 7.22 (m, 2H), 7.03 (d,  $J = 8.1$  Hz, 2H), 6.78 – 6.72 (m, 1H), 5.33 (d,  $J = 12.3$  Hz, 1H), 5.25 (d,  $J = 12.5$  Hz, 1H), 4.73 (d,  $J = 2.5$  Hz, 1H), 2.33 – 2.32 (m, 4H);  $^{13}\text{C}$  NMR (100 MHz,  $\text{CDCl}_3$ )  $\delta$  167.3, 158.8 (d,  $J = 250.2$  Hz), 144.1, 143.7 (d,  $J = 6.8$  Hz), 138.3, 136.6, 134.8, 131.5 (d,  $J = 8.5$  Hz), 131.1, 129.4, 129.3, 128.3, 128.3, 128.1, 127.1, 122.9, 113.1 (d,  $J = 19.8$  Hz), 110.4 (d,  $J = 19.5$  Hz), 108.9 (d,  $J = 3.4$  Hz), 79.9, 77.6, 75.3, 68.0, 46.5, 21.5;  $^{19}\text{F}$  NMR (376 MHz,  $\text{CDCl}_3$ )  $\delta = -117.01$ . HRMS (ESI) for  $\text{C}_{31}\text{H}_{23}\text{BrFNO}_4\text{S}$   $[\text{M}+\text{Na}]^+$ : calcd 626.0407, found 626.0401.

**Benzyl (2S,3S)-2-(4-chlorophenyl)-3-ethynyl-4-fluoro-1-tosylindoline-2-carboxylate (3t)**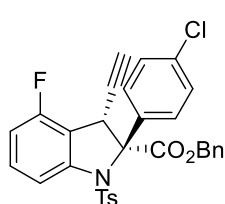

81% isolated yield, colorless oil,  $[\alpha]_D^{25} = 76.1$  ( $c = 1.0$  in  $\text{CHCl}_3$ ); 95.5:4.5 er, 16:1 d.r., determined by HPLC analysis (Chiralpak AZ-H column, hexane/*i*-PrOH, 80:20 v/v, flow rate 1.0 mL/min,  $\lambda = 220$  nm, 25 °C), tR (major) = 27.63 min, tR (minor) = 60.14 min;  $^1\text{H NMR}$  (400 MHz,  $\text{CDCl}_3$ )  $^1\text{H NMR}$  (400 MHz, Chloroform-*d*)  $\delta$  7.63 – 7.58 (m, 2H), 7.35 (d,  $J = 8.2$  Hz, 2H), 7.32 – 7.27 (m, 5H), 7.25 – 7.19 (m, 4H), 7.03 (d,  $J = 8.1$  Hz, 2H), 6.78 – 6.71 (m, 1H), 5.33 (d,  $J = 12.4$  Hz, 1H), 5.25 (d,  $J = 12.5$  Hz, 1H), 4.73 (d,  $J = 2.5$  Hz, 1H), 2.34 – 2.30 (m, 4H);  $^{13}\text{C NMR}$  (100 MHz,  $\text{CDCl}_3$ )  $\delta$  167.3, 158.8 (d,  $J = 250.1$  Hz), 144.1, 143.7, 137.8, 136.7 (d,  $J = 11.4$  Hz), 131.5 (d,  $J = 8.5$  Hz), 129.4, 129.3, 128.4, 128.3, 128.1, 128.1, 127.1, 126.6, 122.9, 113.2 (d,  $J = 19.6$  Hz), 110.4 (d,  $J = 19.3$  Hz), 108.9 (d,  $J = 3.5$  Hz), 79.9, 77.6, 75.3, 68.1, 46.5, 21.5;  $^{19}\text{F NMR}$  (376 MHz,  $\text{CDCl}_3$ )  $\delta = -117.07$ . HRMS (ESI) for  $\text{C}_{31}\text{H}_{23}\text{ClFNO}_4\text{S}$   $[\text{M}+\text{Na}]^+$ : calcd 582.0913, found 582.0915.

**Benzyl (2S,3S)-3-ethynyl-1-((4-methoxyphenyl)sulfonyl)-2-phenylindoline-2-carboxylate (3u)**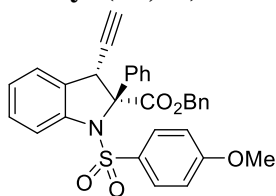

80% isolated yield, white solid,  $[\alpha]_D^{25} = 20.53$  ( $c = 1.20$  in  $\text{CHCl}_3$ ); 94.5:5.5 er, 15:1 d.r., determined by HPLC analysis (Chiralpak AD-H column, hexane/*i*-PrOH, 90:10 v/v, flow rate 0.5 mL/min,  $\lambda = 254$  nm, 25 °C), tR (major) = 69.58 min, tR (minor) = 66.05 min;  $^1\text{H NMR}$  (400 MHz,  $\text{CDCl}_3$ )  $\delta$  7.74 – 7.67 (m, 2H), 7.46 – 7.40 (m, 1H), 7.33 – 7.23 (m, 12H), 7.07 – 7.00 (m, 1H), 6.67 – 6.61 (m, 2H), 5.32 (d,  $J = 12.7$  Hz, 1H), 5.23 (d,  $J = 12.6$  Hz, 1H), 4.81 – 4.76 (m, 1H), 3.74 (s, 3H);  $^{13}\text{C NMR}$  (100 MHz,  $\text{CDCl}_3$ )  $\delta$  167.9, 162.9, 141.5, 139.7, 135.1, 131.4, 129.5, 129.2, 128.2, 128.2, 128.1, 128.0, 128.0, 127.8, 127.0, 124.7, 123.1, 113.6, 112.9, 79.6, 79.4, 74.9, 67.5, 55.5, 50.1. HRMS (ESI) for  $\text{C}_{31}\text{H}_{25}\text{NO}_4\text{S}$   $[\text{M}+\text{Na}]^+$ : calcd 546.1346, found 546.1340.

**Benzyl (2S,3S)-1-((4-bromophenyl)sulfonyl)-3-ethynyl-2-phenylindoline-2-carboxylate (3v)**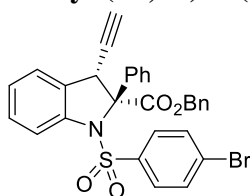

76% isolated yield, colorless oil,  $[\alpha]_D^{25} = 22.10$  ( $c = 1.20$  in  $\text{CHCl}_3$ ); 92.5:7.5 er, 15:1 d.r., determined by HPLC analysis (Chiralpak AD-H column, hexane/*i*-PrOH, 90:10 v/v, flow rate 0.5 mL/min,  $\lambda = 210$  nm, 25 °C), tR (major) = 32.31 min, tR (minor) = 27.64 min;  $^1\text{H NMR}$  (400 MHz,  $\text{CDCl}_3$ )  $^1\text{H NMR}$  (400 MHz, Chloroform-*d*)  $\delta$  7.68 – 7.64 (m, 2H), 7.48 – 7.43 (m, 1H), 7.33 – 7.28 (m, 5H), 7.27 – 7.24 (m, 7H), 7.20 – 7.15 (m, 2H), 7.08 (t,  $J = 7.5$  Hz, 1H), 5.32 (d,  $J = 12.5$  Hz, 1H), 5.24 (d,  $J = 12.6$  Hz, 1H), 4.82 (d,  $J = 2.5$  Hz, 1H), 2.32 (d,  $J = 2.6$  Hz, 1H);  $^{13}\text{C NMR}$  (100 MHz,  $\text{CDCl}_3$ )  $\delta$  167.7, 141.1, 139.2, 138.8, 134.9, 131.7, 129.4, 128.5, 128.4, 128.2, 128.1, 128.1, 128.0, 127.8, 127.0, 125.0, 123.6, 113.6, 112.9, 79.6, 79.3, 75.1, 67.7; HRMS (ESI) for  $\text{C}_{30}\text{H}_{22}\text{BrNO}_4\text{S}$   $[\text{M}+\text{Na}]^+$ : calcd 594.0345, found 594.0349.

**Benzyl (2S,3S)-3-ethynyl-2-phenyl-1-(*m*-tolylsulfonyl)indoline-2-carboxylate (3w)**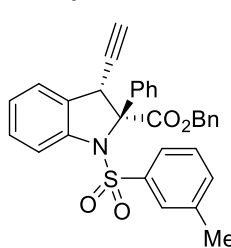

75% isolated yield, colorless oil,  $[\alpha]_D^{25} = -2.90$  ( $c = 0.87$  in  $\text{CHCl}_3$ ); 94:6 er, 12:1 d.r., determined by HPLC analysis (Chiralpak AD-H column, hexane/*i*-PrOH, 80:20 v/v, flow rate 1.0 mL/min,  $\lambda = 254$  nm, 25 °C), tR (major) = 13.53 min, tR (minor) = 18.46 min;  $^1\text{H NMR}$  (400 MHz,  $\text{CDCl}_3$ )  $\delta$  7.71 – 7.64 (m, 2H), 7.55 – 7.49 (m, 1H), 7.35 – 7.27 (m, 4H), 7.26 – 7.17 (m, 8H), 7.16 – 7.03 (m, 2H), 6.85 (s, 1H), 5.34 (d,  $J = 12.7$  Hz, 1H), 5.23 (d,  $J = 12.7$  Hz, 1H),



4.85 – 4.80 (m, 1H), 2.28 (d,  $J = 2.6$  Hz, 1H), 2.16 (s, 3H);  $^{13}\text{C}$  NMR (100 MHz,  $\text{CDCl}_3$ )  $\delta$  167.8, 141.6, 139.8, 139.3, 138.7, 135.1, 133.5, 129.3, 128.5, 128.3, 128.2, 128.2, 128.0, 127.8, 127.8, 127.4, 127.0, 124.7, 124.1, 123.1, 113.0, 79.3, 79.2, 75.0, 67.5, 50.2, 21.2. HRMS (ESI) for  $\text{C}_{24}\text{H}_{21}\text{ClO}_2$   $[\text{M}+\text{Na}]^+$ : calcd 530.1397, found 530.1403.

#### ((2S,3S)-3-ethynyl-2-phenyl-1-tosylindolin-2-yl)methanol (6)

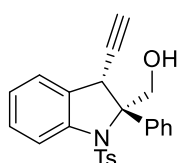

87% isolated yield, colorless oil,  $[\alpha]_{\text{D}}^{25} = -1.80$  ( $c = 1.00$  in  $\text{CHCl}_3$ ); 94.5:5.5 er, 19:1 d.r., determined by HPLC analysis (Chiralpak AD-H column, hexane/*i*-PrOH, 90:10 v/v, flow rate 1.0 mL/min,  $\lambda = 254$  nm, 25 °C), tR (major) = 41.52 min, tR (minor) = 44.32 min;  $^1\text{H}$  NMR (400 MHz,  $\text{CDCl}_3$ )  $\delta$  7.68 – 7.62 (m, 2H), 7.59 – 7.53 (m, 1H), 7.47 – 7.40 (m, 2H), 7.32 – 7.26 (m, 3H), 7.25 – 7.20 (m, 2H), 7.19 – 7.15 (m, 2H), 7.06 – 6.98 (m, 1H), 4.86 (dd,  $J = 12.8, 5.9$  Hz, 1H), 4.75 (dd,  $J = 12.8, 8.3$  Hz, 1H), 4.47 (d,  $J = 2.5$  Hz, 1H), 2.78 – 2.67 (m, 1H), 2.38 (d,  $J = 2.7$  Hz, 1H), 2.36 (s, 3H);  $^{13}\text{C}$  NMR (100 MHz,  $\text{CDCl}_3$ )  $\delta$  143.9, 142.1, 141.7, 137.4, 129.4, 128.9, 128.5, 128.5, 128.3, 127.9, 127.3, 126.2, 124.4, 123.7, 114.0, 79.7, 79.3, 74.9, 65.1, 47.8, 21.5. HRMS (ESI) for  $\text{C}_{24}\text{H}_{21}\text{NO}_3\text{S}$   $[\text{M}+\text{Na}]^+$ : calcd 426.1134, found 426.1126.

#### ((2S,3S)-3-ethynyl-2-phenylindolin-2-yl)methanol (7)

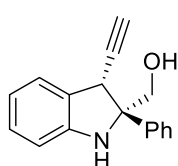

85% isolated yield, colorless oil,  $[\alpha]_{\text{D}}^{25} = -12.10$  ( $c = 1.00$  in  $\text{CHCl}_3$ ); 94.5:5.5 er, 19:1 d.r., determined by HPLC analysis (Chiralpak AD-H column, hexane/*i*-PrOH, 90:10 v/v, flow rate 1.0 mL/min,  $\lambda = 254$  nm, 25 °C), tR (major) = 14.59 min, tR (minor) = 18.12 min;  $^1\text{H}$  NMR (400 MHz,  $\text{CDCl}_3$ )  $\delta$  7.61 (d,  $J = 7.7$  Hz, 2H), 7.31 (t,  $J = 7.6$  Hz, 2H), 7.27 – 7.18 (m, 2H), 7.14 (d,  $J = 7.9$  Hz, 1H), 7.04 (t,  $J = 7.7$  Hz, 1H), 6.83 – 6.60 (m, 2H), 4.15 (d,  $J = 2.6$  Hz, 1H), 4.07 (d,  $J = 11.4$  Hz, 1H), 3.80 (d,  $J = 11.5$  Hz, 1H), 2.35 (d,  $J = 2.3$  Hz, 1H).;  $^{13}\text{C}$  NMR (100 MHz,  $\text{CDCl}_3$ )  $\delta$  148.4, 143.1, 128.7, 128.6, 127.8, 127.6, 126.0, 124.1, 119.5, 110.5, 80.3, 73.3, 72.2, 66.5, 44.1. HRMS (ESI) for  $\text{C}_{17}\text{H}_{15}\text{NO}$   $[\text{M}+\text{Na}]^+$ : calcd 272.10, found 272.11

#### (9S,9S)-9-ethynyl-9-phenyl-9,9-dihydro-1H,3H-oxazolo[3,4-a]indol-3-one (8)

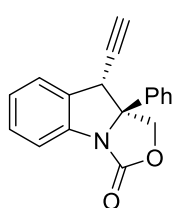

90% isolated yield, colorless oil,  $[\alpha]_{\text{D}}^{25} = 6.77$  ( $c = 1.00$  in  $\text{CHCl}_3$ ); 94.5:5.5 er, 19:1 d.r., determined by HPLC analysis (Chiralpak AD-H column, hexane/*i*-PrOH, 95:5 v/v, flow rate 1.0 mL/min,  $\lambda = 220$  nm, 25 °C), tR (major) = 15.77 min, tR (minor) = 19.9 min;  $^1\text{H}$  NMR (400 MHz,  $\text{CDCl}_3$ )  $\delta$  7.65 (d,  $J = 7.9$  Hz, 1H), 7.42 – 7.24 (m, 7H), 7.17 (t,  $J = 7.5$  Hz, 1H), 5.32 (d,  $J = 8.9$  Hz, 1H), 4.60 (d,  $J = 8.9$  Hz, 1H), 4.23 (d,  $J = 2.6$  Hz, 1H).;  $^{13}\text{C}$  NMR (100 MHz,  $\text{CDCl}_3$ )  $\delta$  156.5, 144.2, 139.9, 131.8, 129.5, 128.2, 125.9, 125.5, 124.2, 116.3, 79.5, 74.5, 73.3, 46.3, 22.5. HRMS (ESI) for  $\text{C}_{18}\text{H}_{13}\text{NO}_2$   $[\text{M}+\text{Na}]^+$ : calcd 298.08, found 298.09.

#### Benzyl (R)-2-phenyl-1-tosyl-3-vinylideneindoline-2-carboxylate (9)

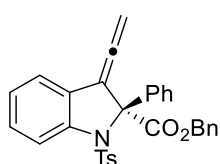

83% isolated yield, colorless oil,  $[\alpha]_{\text{D}}^{25} = 55.57$  ( $c = 0.85$  in  $\text{CHCl}_3$ ); 93:7 er, determined by HPLC analysis (Chiralpak AZ-H column, hexane/*i*-PrOH, 80:20 v/v, flow rate 1.0 mL/min,  $\lambda = 254$  nm, 25 °C), tR (major) = 13.53 min, tR (minor) = 20.70 min;  $^1\text{H}$  NMR (400 MHz,  $\text{CDCl}_3$ )  $\delta$  7.58 – 7.53 (m, 2H), 7.43 –

7.34 (m, 3H), 7.34 – 7.27 (m, 4H), 7.26 – 7.17 (m, 5H), 7.04 – 6.98 (m, 1H), 6.95 (s, 4H), 5.37 (s, 2H), 5.20 (d,  $J = 13.4$  Hz, 1H), 5.04 (d,  $J = 13.4$  Hz, 1H), 2.27 (s, 3H);  $^{13}\text{C}$  NMR (100 MHz,  $\text{CDCl}_3$ )  $\delta$  202.5, 168.4, 143.4, 138.0, 137.2, 135.5, 130.3, 129.6, 129.1, 128.3, 128.3, 128.1, 127.7, 126.9, 123.2, 122.6, 112.9, 85.8, 67.9, 21.4. **HRMS** (ESI) for  $\text{C}_{31}\text{H}_{25}\text{NO}_4\text{S}$   $[\text{M}+\text{Na}]^+$ : calcd 530.1397, found 530.1395.

### 3.3 Synthetic transformation

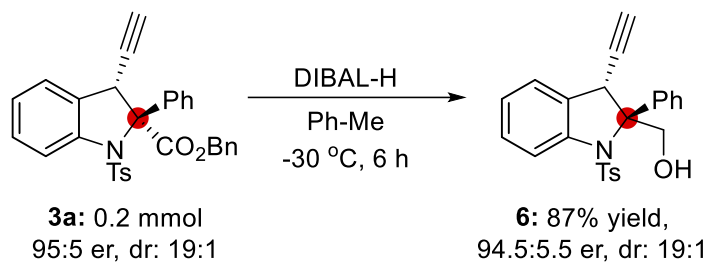

**Procedure I:** Under argon atmosphere, a flame-dried 10 mL Schlenk tube was charged with compound **3aa** (101.4 mg, 0.20 mmol) and anhydrous Ph-Me (2.0 mL) and cooled to  $-30$  °C. To this solution, DIBAL-H (5.0 equiv., 1.5 M in Ph-Me) was added dropwise, and the reaction mixture was maintained at  $-30$  °C for 6 hours. The reaction was quenched with saturated  $\text{NH}_4\text{Cl}$  aqueous solution and extracted with ethyl acetate. The combined organic layer was dried with  $\text{Na}_2\text{SO}_4$ , and evaporated under reduced pressure. The residue was purified by column chromatography afford the desired product **5aa** in 87% yield and 94.5:5.5 er.

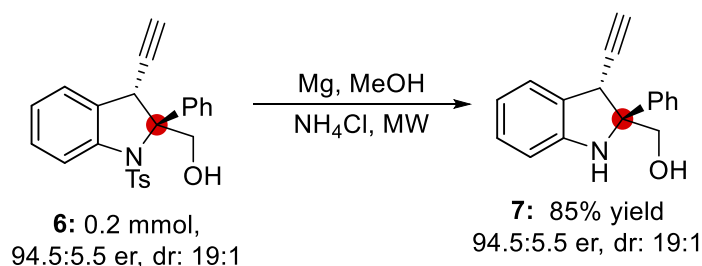

**Procedure II:** Under argon atmosphere, a flame-dried 10 mL Schlenk tube was charged with compound **6** (80.6 mg, 0.20 mmol) and Mg (240 mg, 10 mmol, 200-300 mesh) and  $\text{NH}_4\text{Cl}$  (642mg 12 mmol) and anhydrous MeOH (4.0 mL). The resulting solution was in MW for 4 h. Then  $\text{NH}_4\text{Cl}$  (3 mL) was added to the reaction mixture to quench excess magnesium powder. The aqueous phase was extracted with ethyl acetate (4×5 mL). The combined organic layers were dried over  $\text{Na}_2\text{SO}_4$ , filtered and concentrated in vacuo. The residue was purified by column chromatography afford the desired product **7** in 85% yield and 94.5:5.5 er.

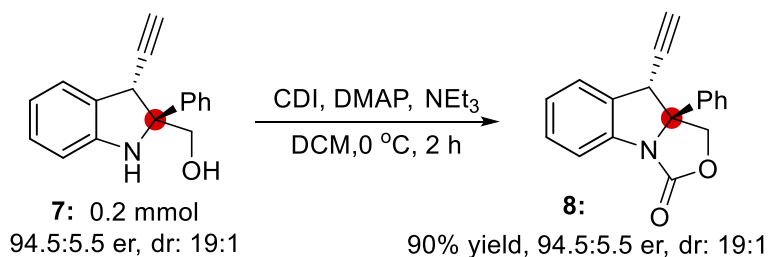

**Procedure III:** Under argon atmosphere, a flame-dried 10 mL Schlenk tube was charged with compound **7** (50 mg, 0.20 mmol) and anhydrous DCM (2.0 mL) and cooled to 0 °C. To this solution, DMAP (2.4 mg, 0.02 mmol), Et<sub>3</sub>N (61 μL, 4.4 mmol), and 1,1'-carbonyldiimidazole (42.2mg, 0.26 mmol). The mixture was stirred at 0 °C for 2 h. Remove the solvent under vacuum. The residue was purified by column chromatography afford the desired product **8** in 90% yield and 94.5:5.5 er.

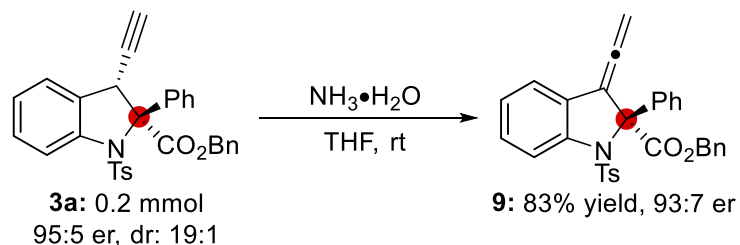

**Procedure IV:** In a flame-dried 10 ml Schlenk tube **3a** (101.43. mg, 0.20 mmol) were dissolved in THF (2.0 mL). To the resulting solution, NH<sub>3</sub>·H<sub>2</sub>O (3.0 mL) was added sequentially. After stirred for 3 h, the solvent was removed under vacuum. The reaction mixture was directly purified by flash column chromatography on silica gel to afford the desired product **9** in 83% yield and 93:7 ee.

#### 4. X-Ray Structures of Product **3u**

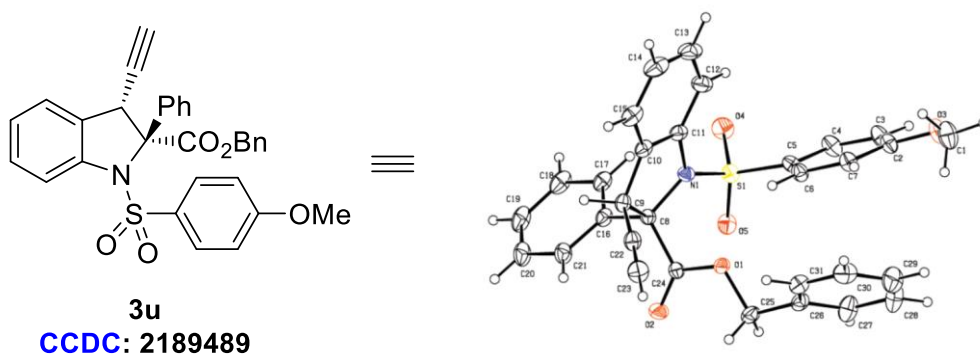

**Figure S1.** X-ray crystallography of **3u**

## 5. Copies of NMR Spectra

<sup>1</sup>H NMR spectrum of compound 3a (400 MHz, CDCl<sub>3</sub>)

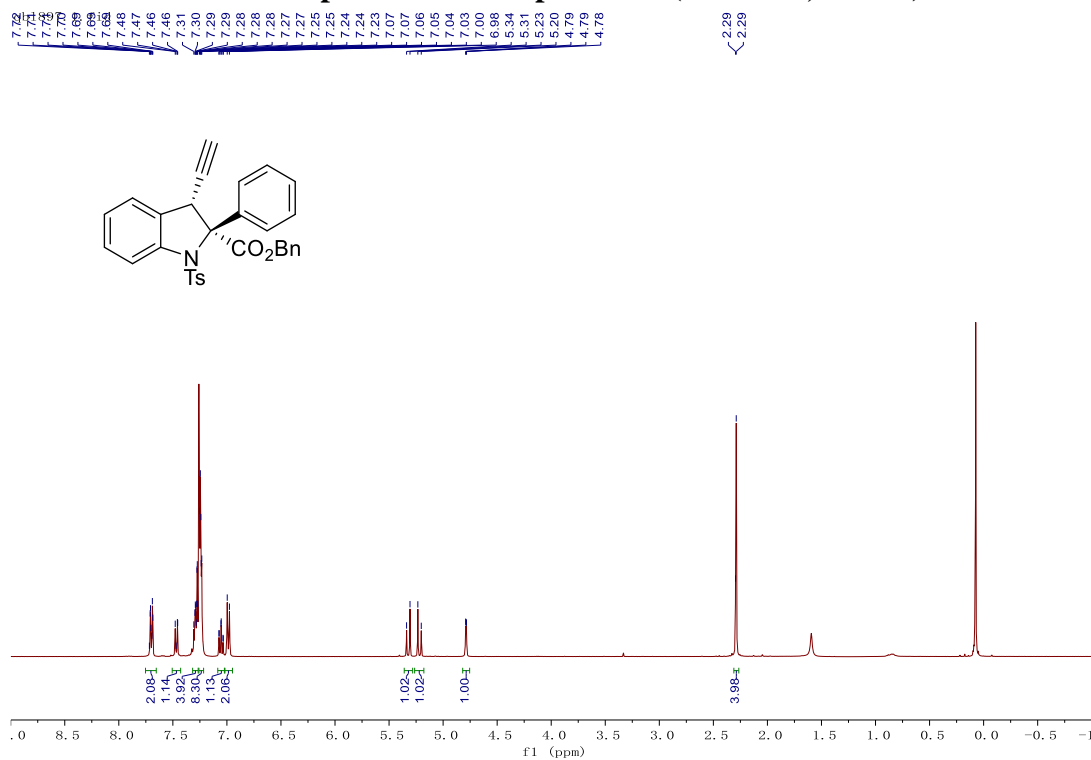

### <sup>1</sup>H NMR spectrum of compound 3b (400 MHz, CDCl<sub>3</sub>)

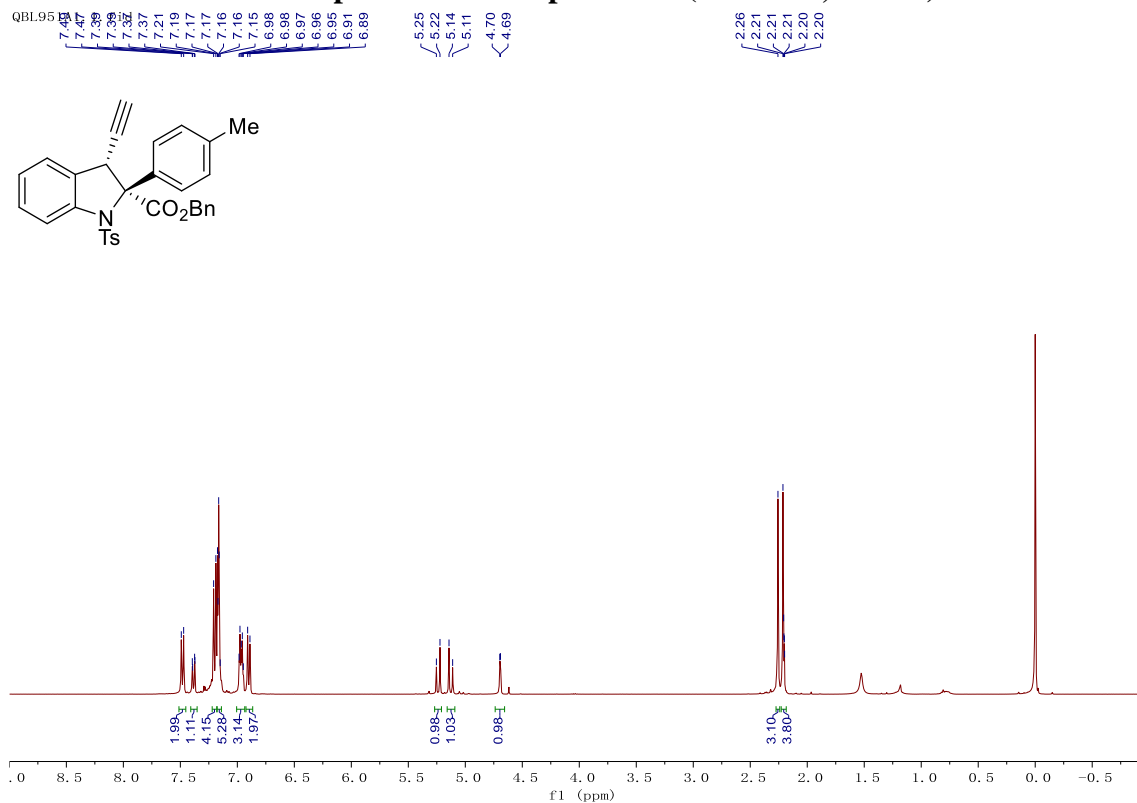

### <sup>13</sup>C NMR spectrum of compound 3b (100 MHz, CDCl<sub>3</sub>)

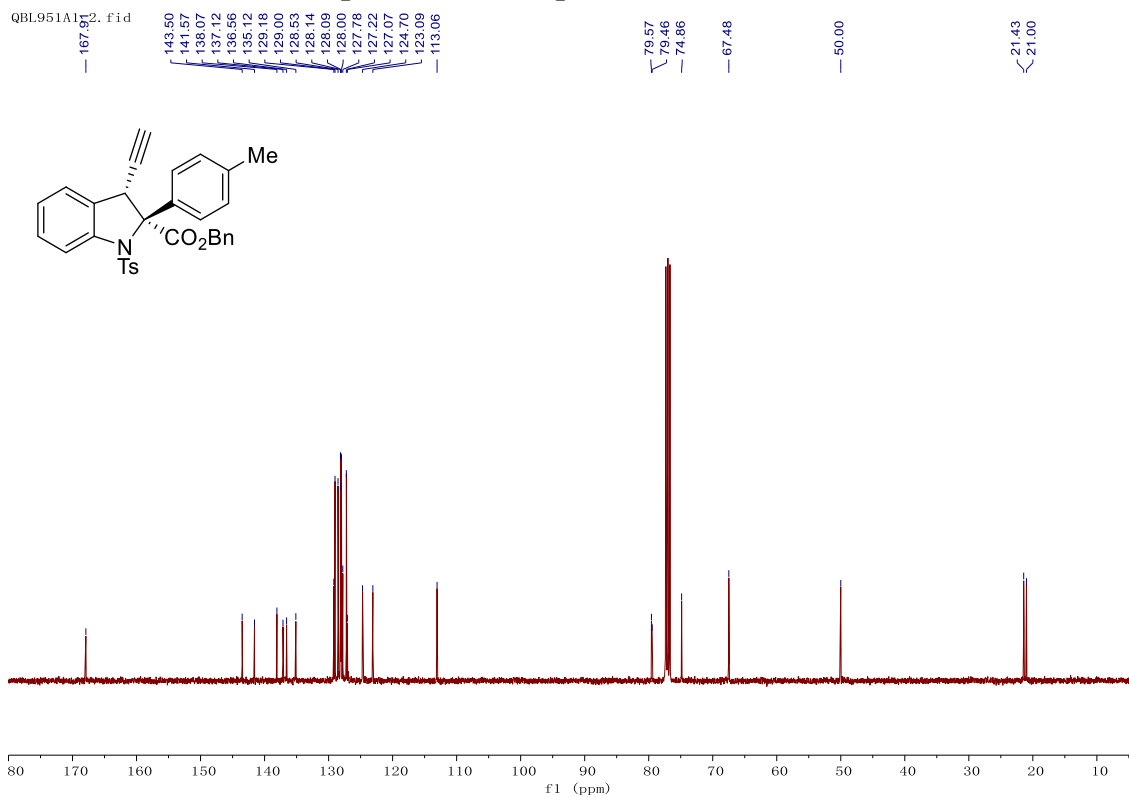

### <sup>1</sup>H NMR spectrum of compound 3c (400 MHz, CDCl<sub>3</sub>)

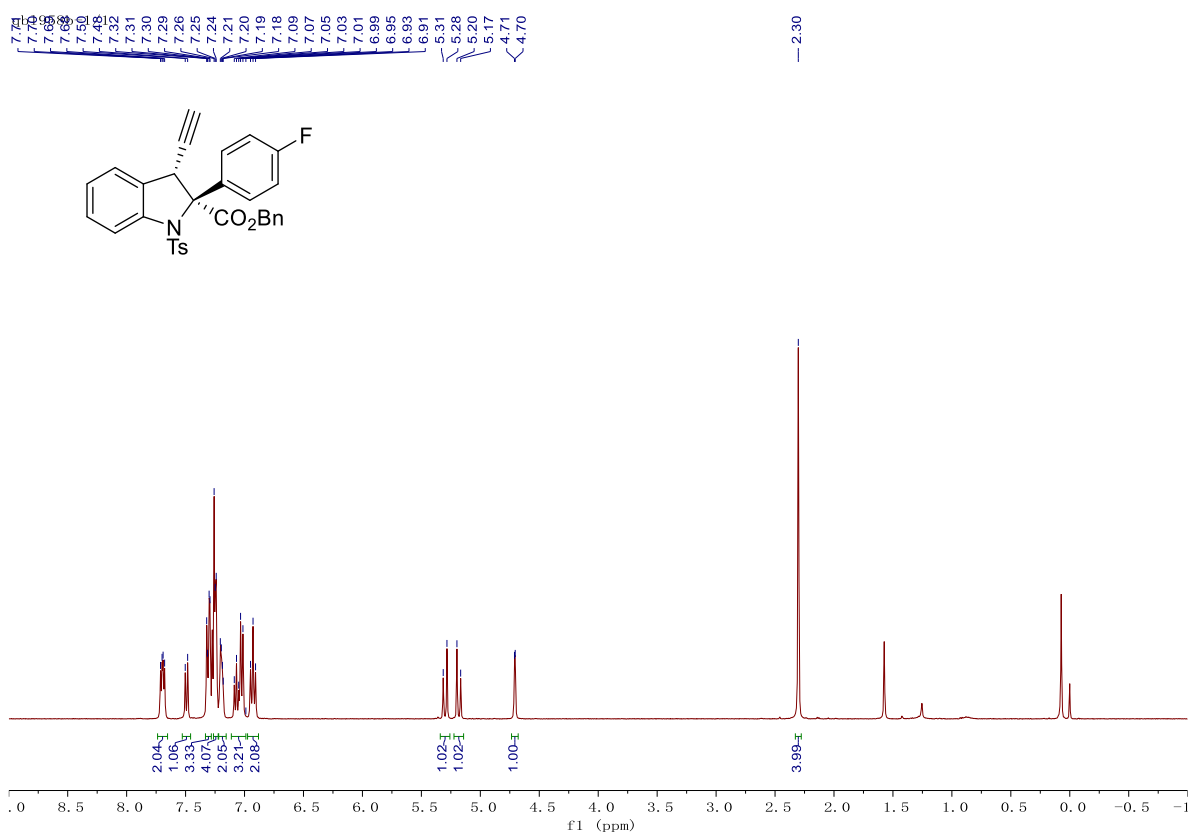

### <sup>13</sup>C NMR spectrum of compound 3c (100 MHz, CDCl<sub>3</sub>)

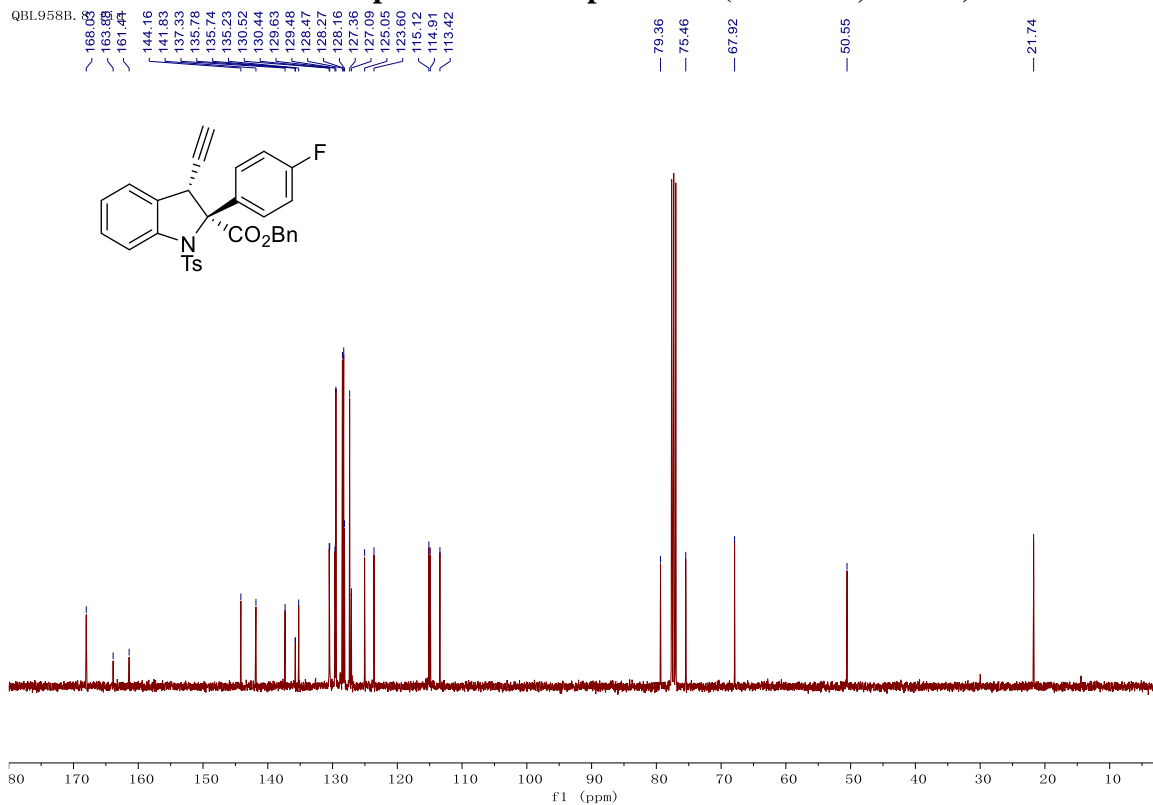

### <sup>19</sup>F NMR spectrum of compound 3c (376 MHz, CDCl<sub>3</sub>)

QBL958B. 9. fid

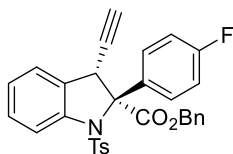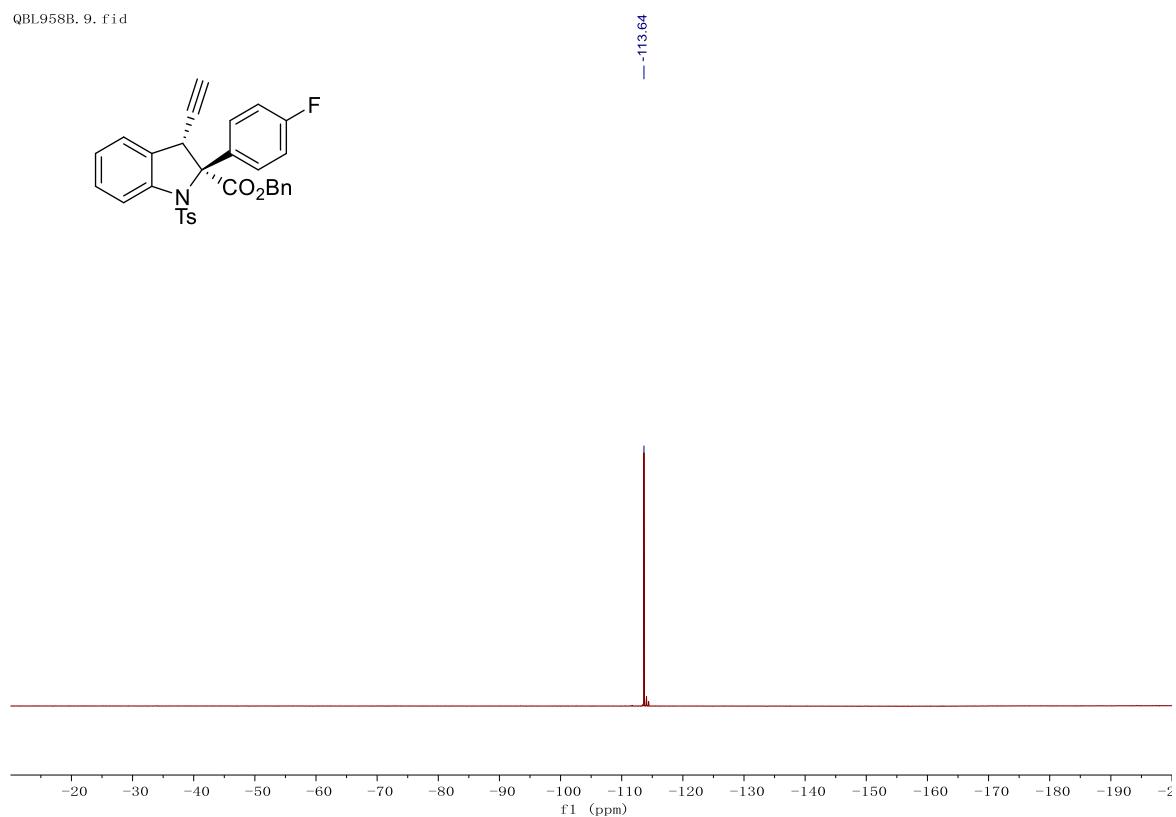

### <sup>1</sup>H NMR spectrum of compound 3d (400 MHz, CDCl<sub>3</sub>)

7.665, 7.663, 7.662, 7.553, 7.551, 7.333, 7.331, 7.229, 7.228, 7.227, 7.226, 7.224, 7.223, 7.220, 7.118, 7.088, 7.066, 7.064, 7.062, 7.000, 6.995, 6.991, 6.889, 5.530, 5.527, 5.17, 5.168, 4.67, 2.30, 2.29

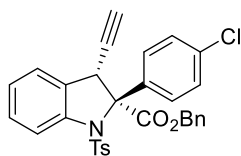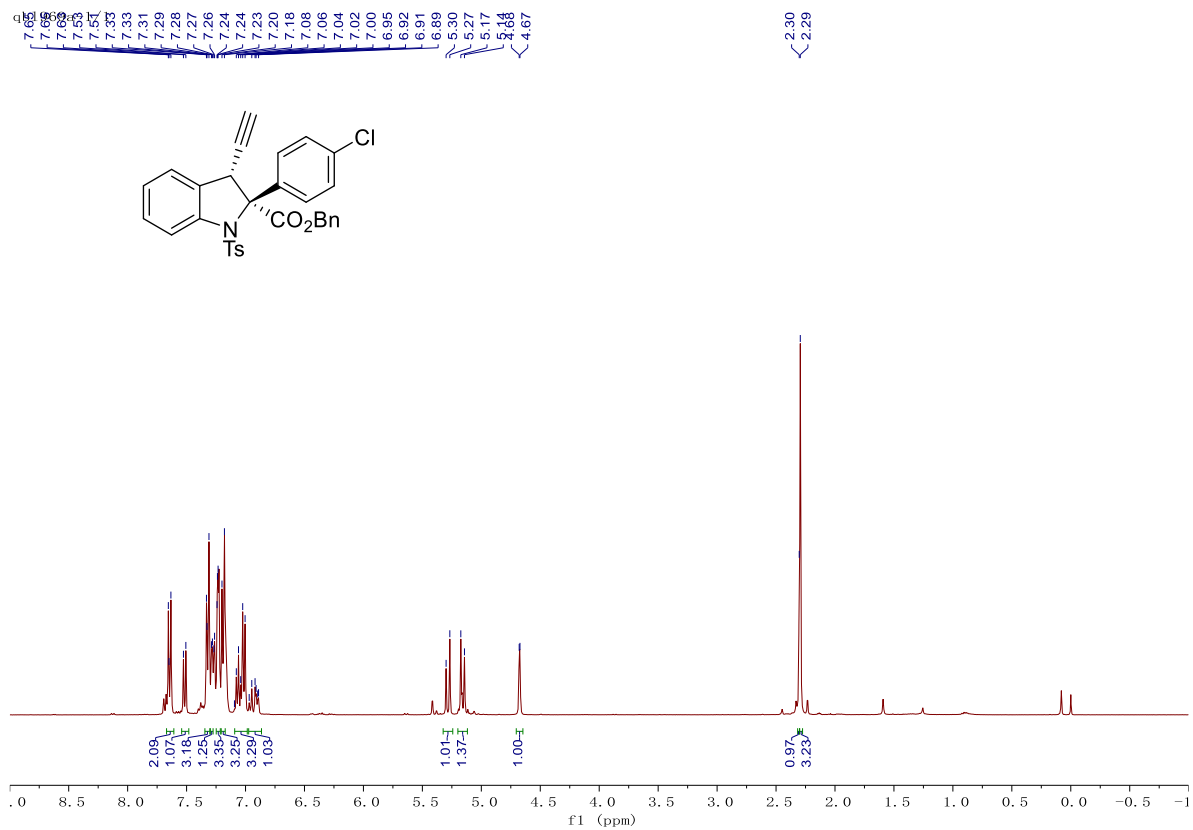

### <sup>13</sup>C NMR spectrum of compound 3d (100 MHz, CDCl<sub>3</sub>)

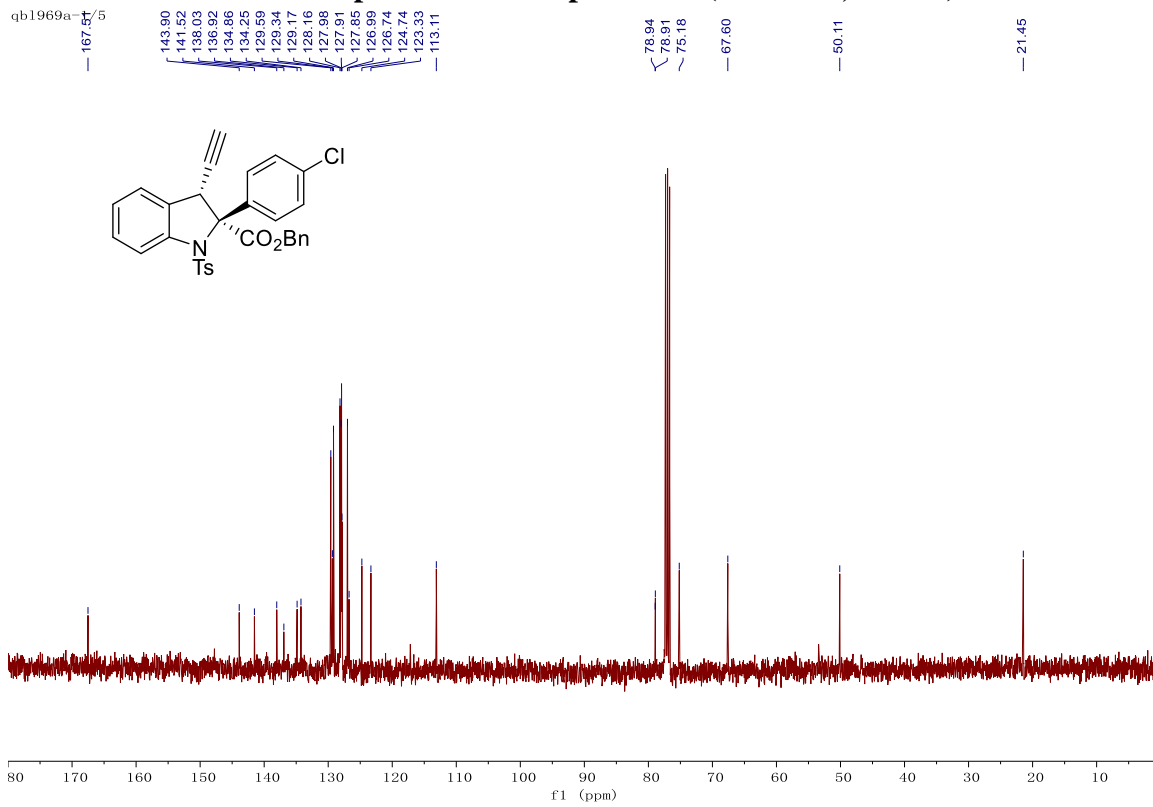

### <sup>1</sup>H NMR spectrum of compound 3e (400 MHz, CDCl<sub>3</sub>)

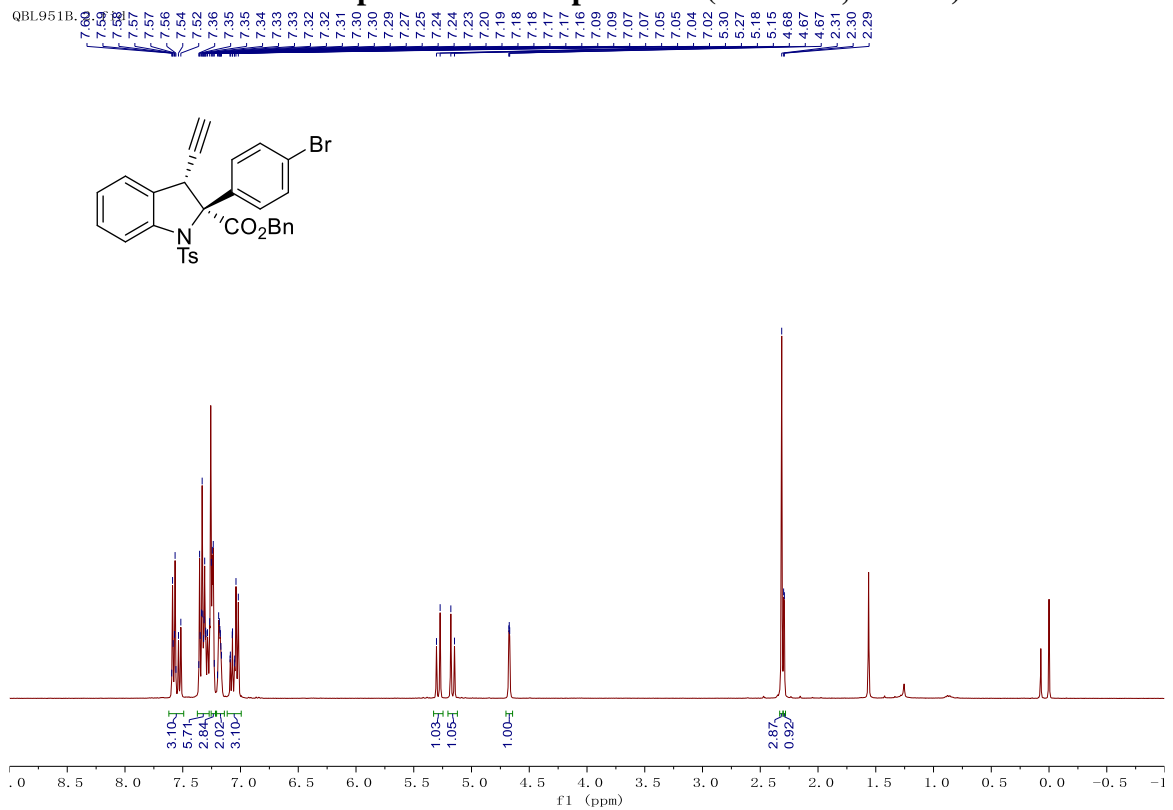



### <sup>13</sup>C NMR spectrum of compound 3e (100 MHz, CDCl<sub>3</sub>)

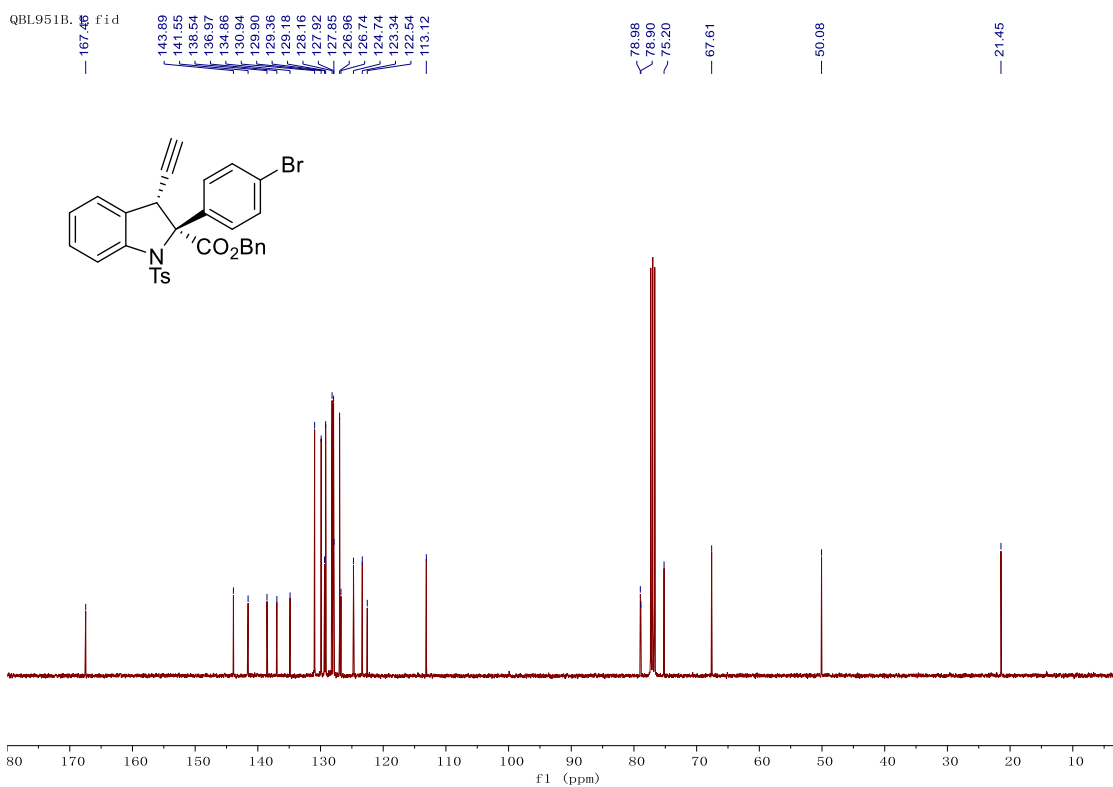

### <sup>1</sup>H NMR spectrum of compound 3f (400 MHz, CDCl<sub>3</sub>)

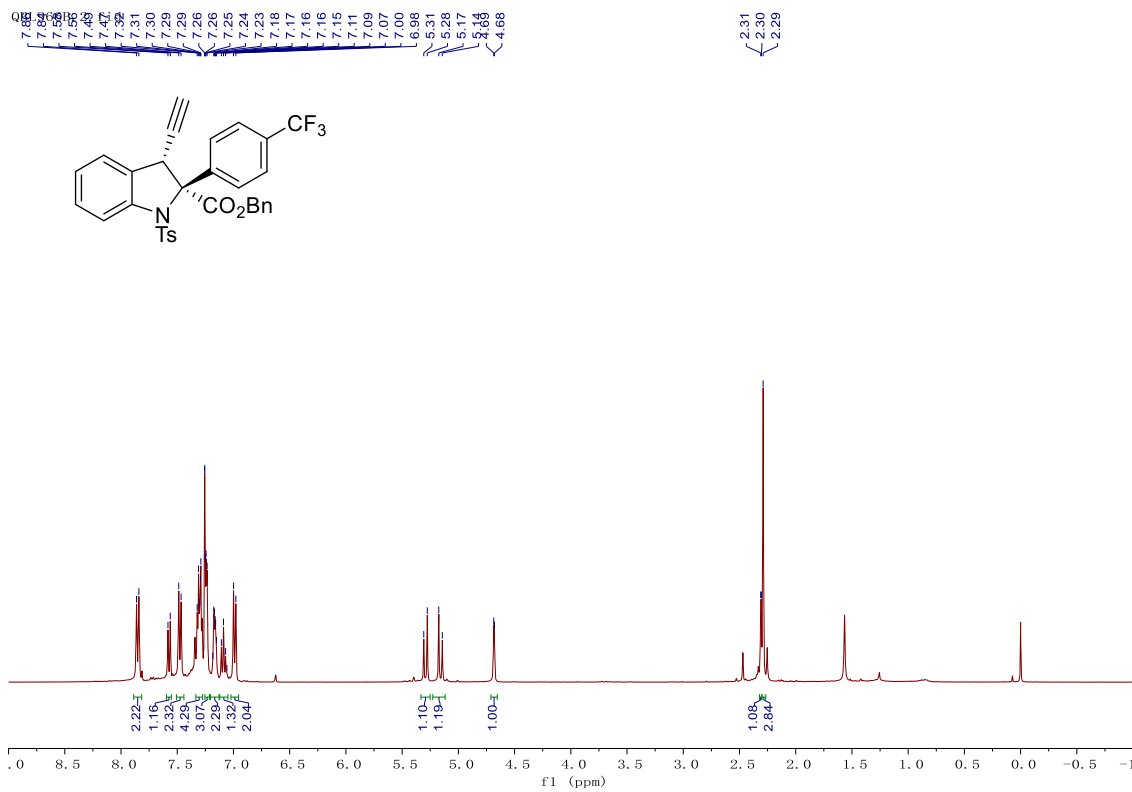

### <sup>13</sup>C NMR spectrum of compound 3f (100 MHz, CDCl<sub>3</sub>)

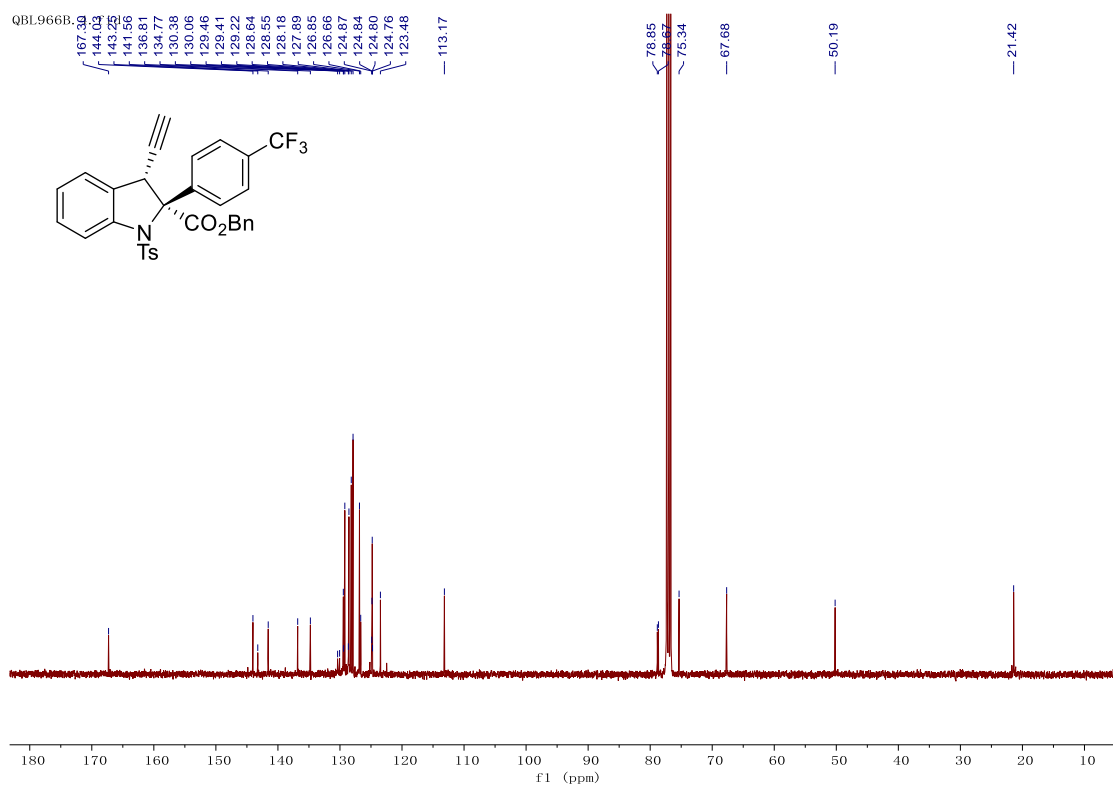

### <sup>19</sup>F NMR spectrum of compound 3f (376 MHz, CDCl<sub>3</sub>)

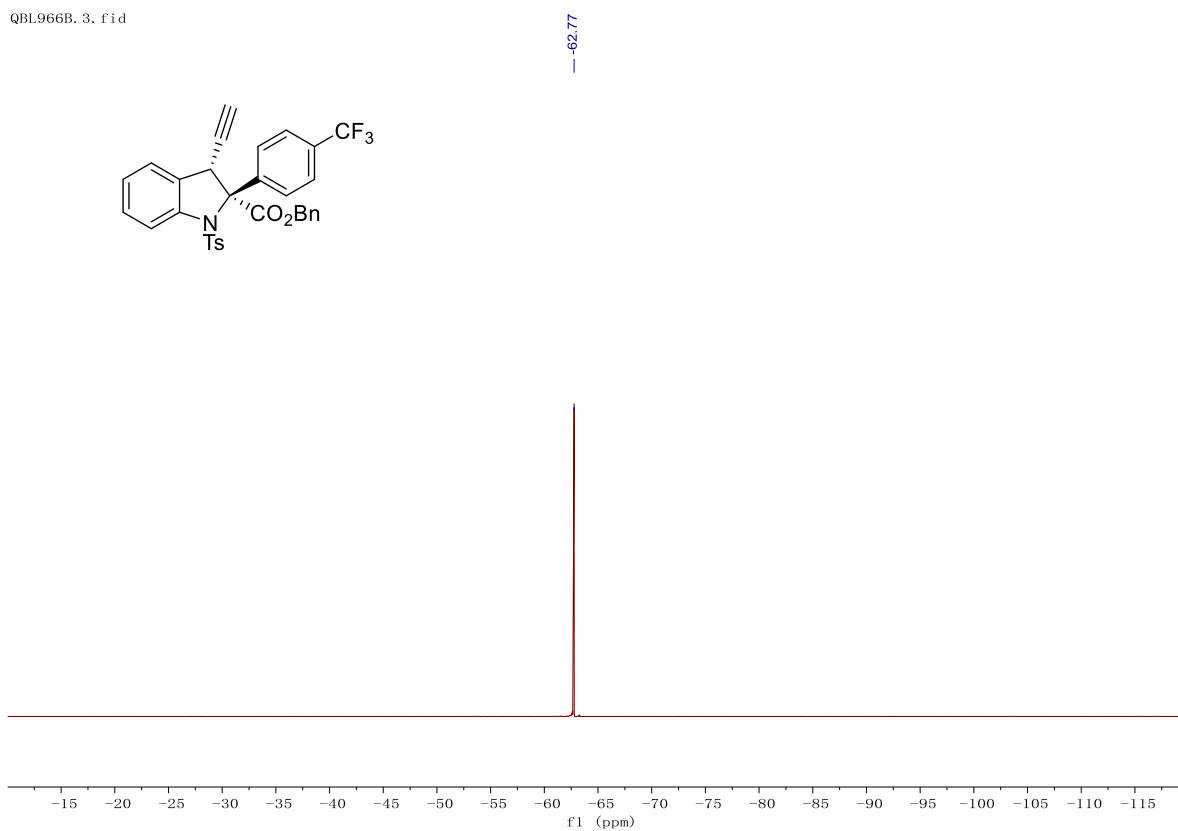

### <sup>1</sup>H NMR spectrum of compound 3g (400 MHz, CDCl<sub>3</sub>)

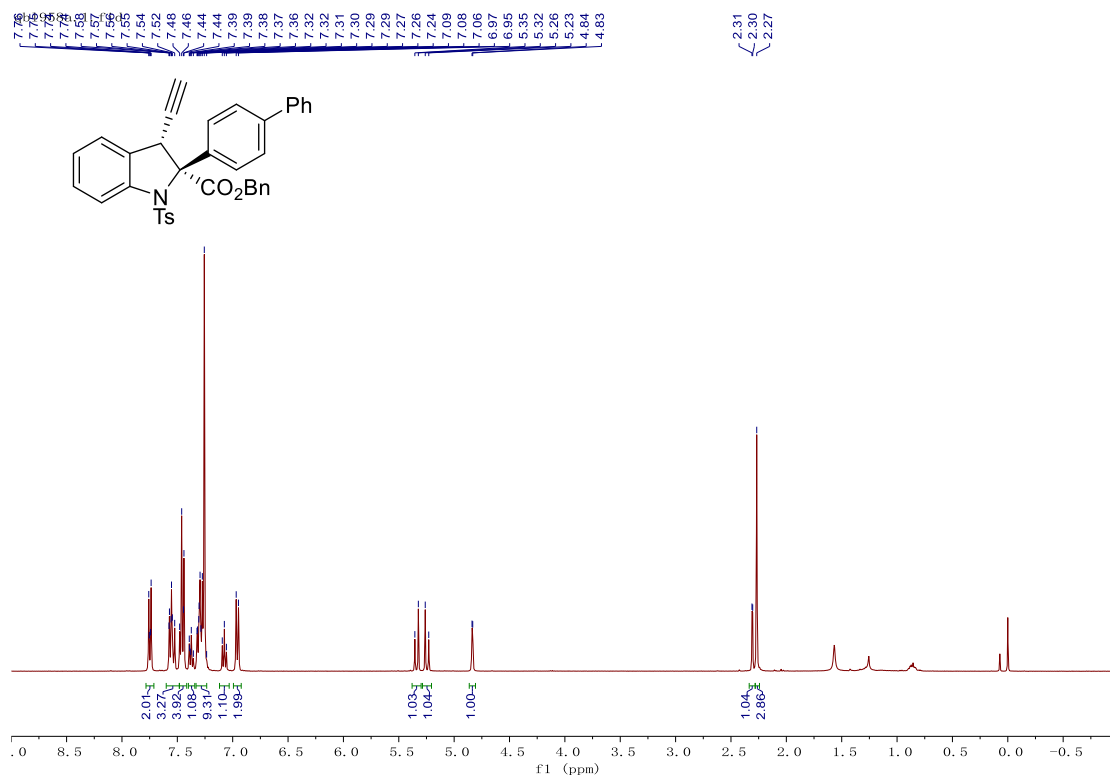

### <sup>13</sup>C NMR spectrum of compound 3g (100 MHz, CDCl<sub>3</sub>)

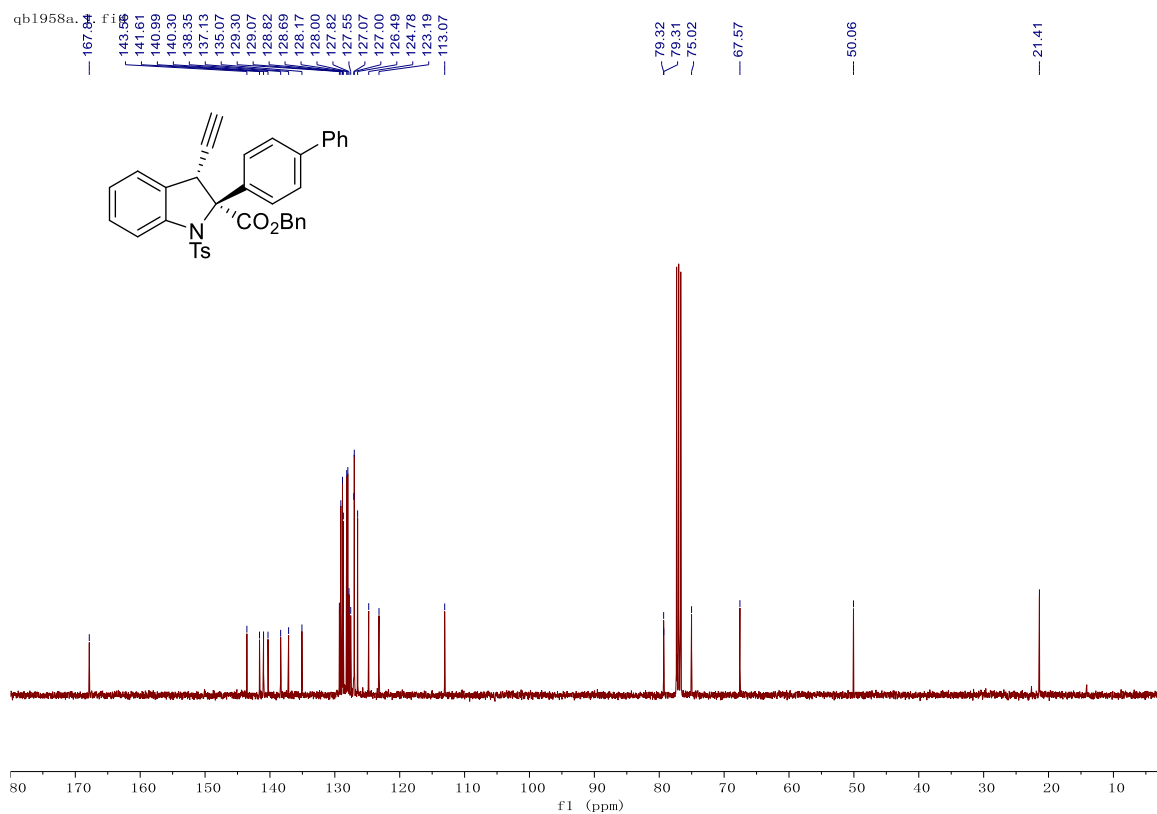

### <sup>1</sup>H NMR spectrum of compound 3h (400 MHz, CDCl<sub>3</sub>)

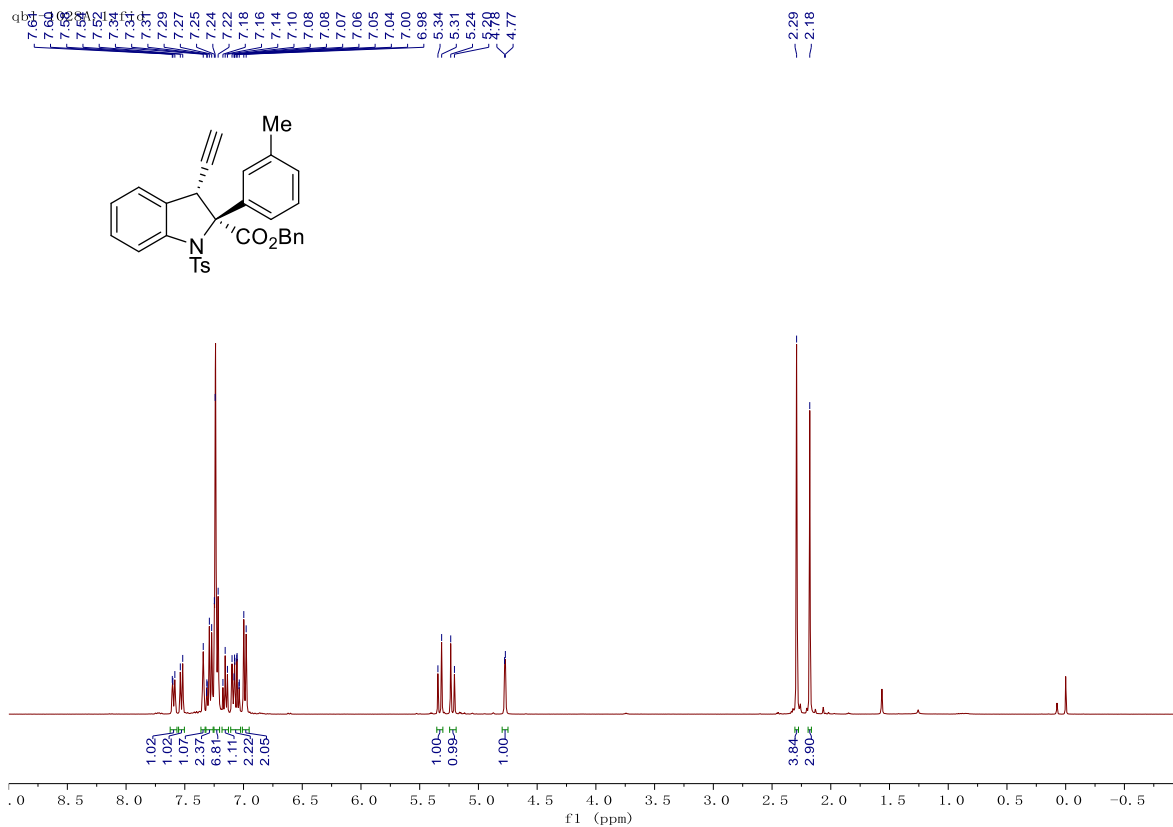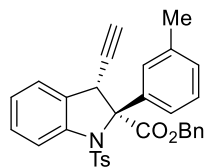

### <sup>13</sup>C NMR spectrum of compound 3h (100 MHz, CDCl<sub>3</sub>)

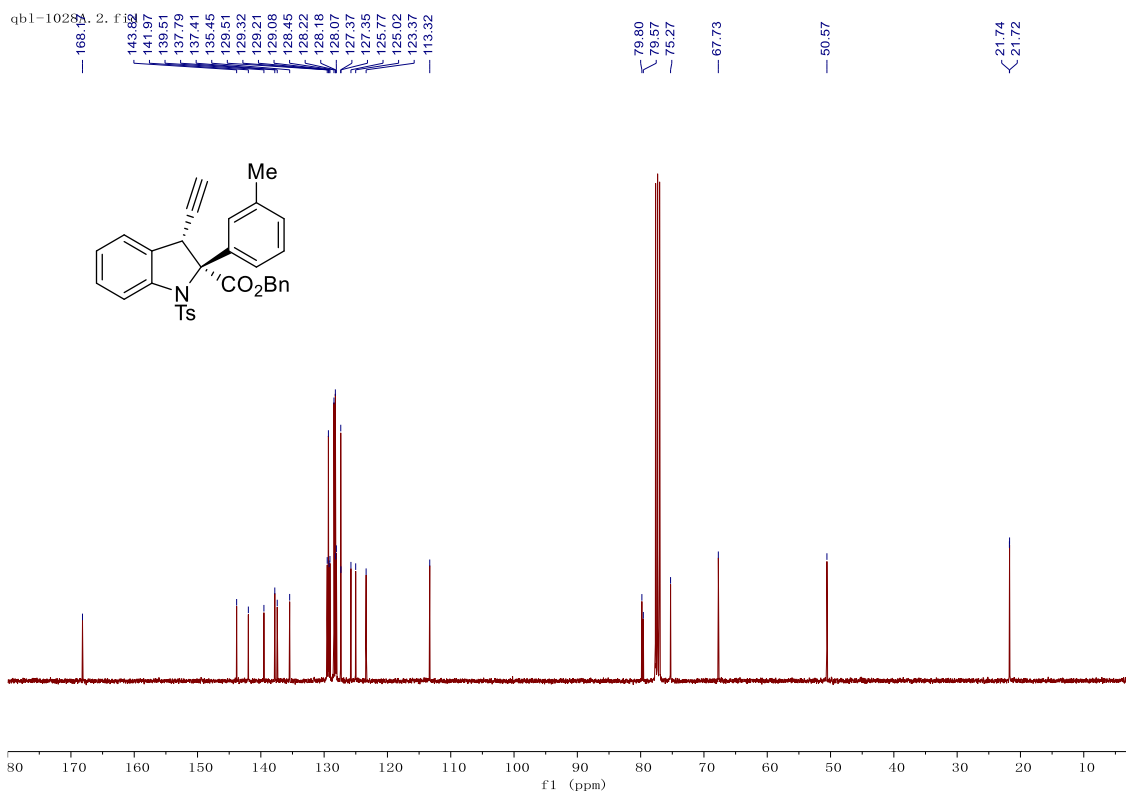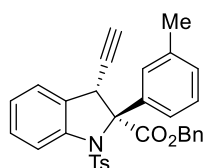

### <sup>1</sup>H NMR spectrum of compound 3i (400 MHz, CDCl<sub>3</sub>)

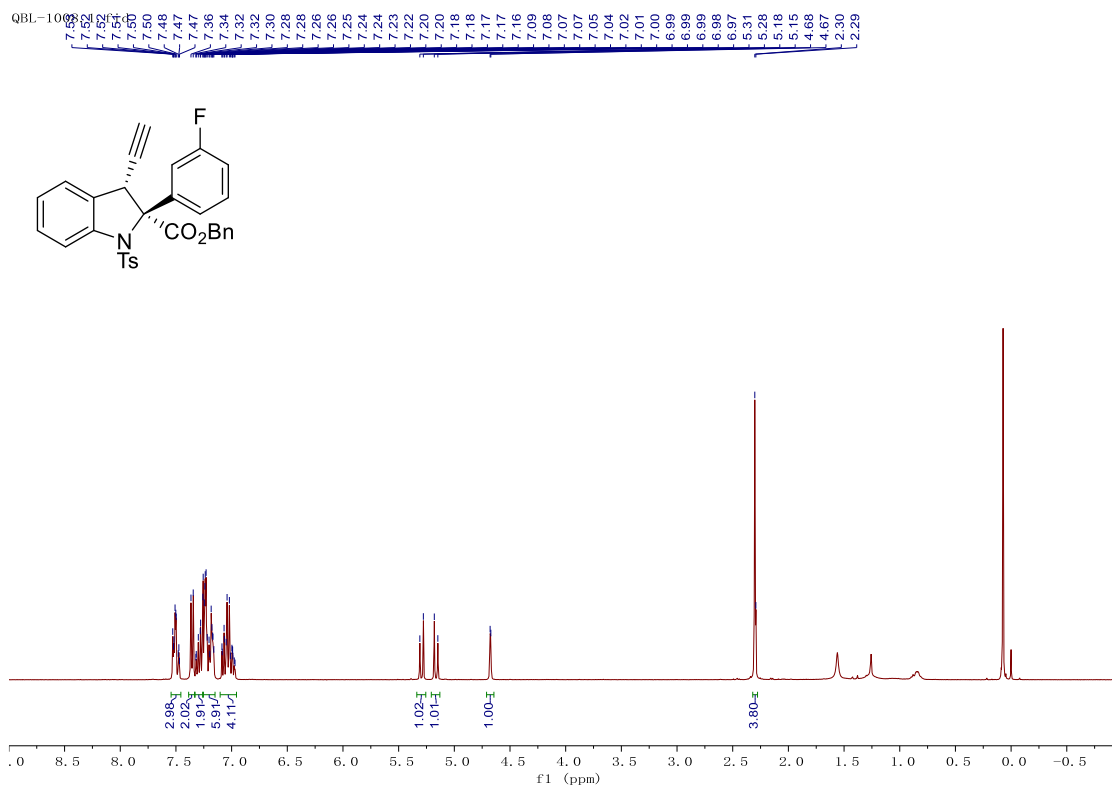

### <sup>13</sup>C NMR spectrum of compound 3i (100 MHz, CDCl<sub>3</sub>)

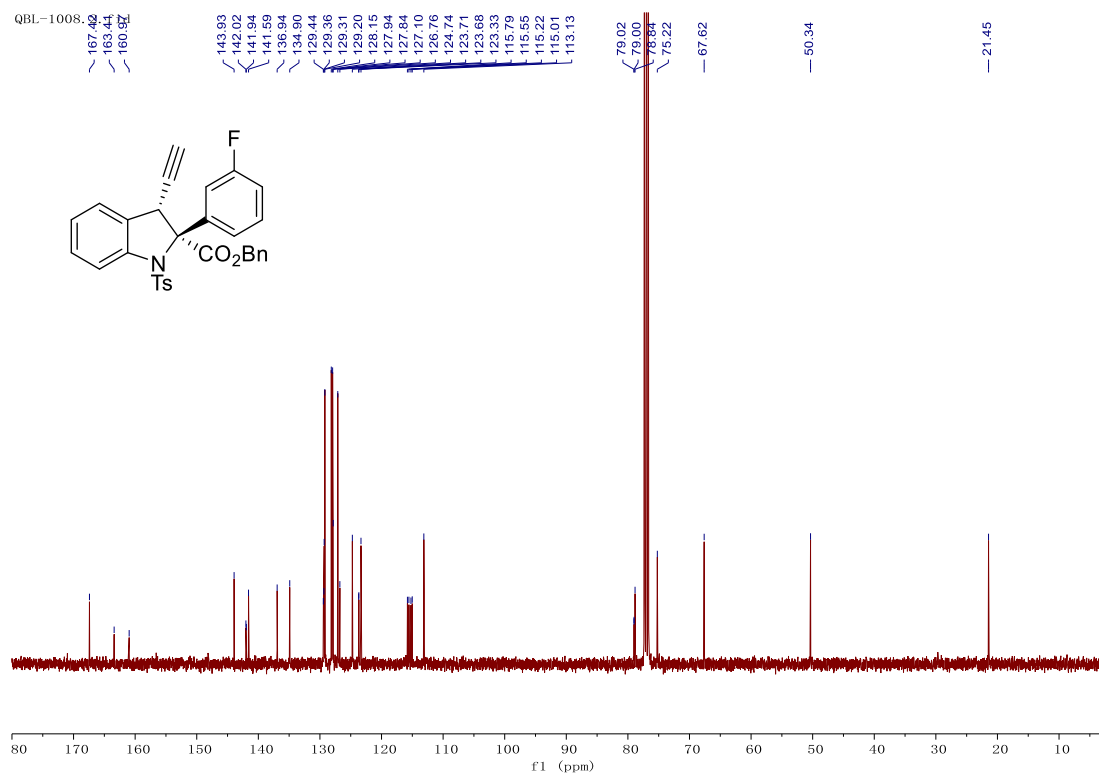

### <sup>19</sup>F NMR spectrum of compound 3i (376 MHz, CDCl<sub>3</sub>)

QBL1008B. 1. fid

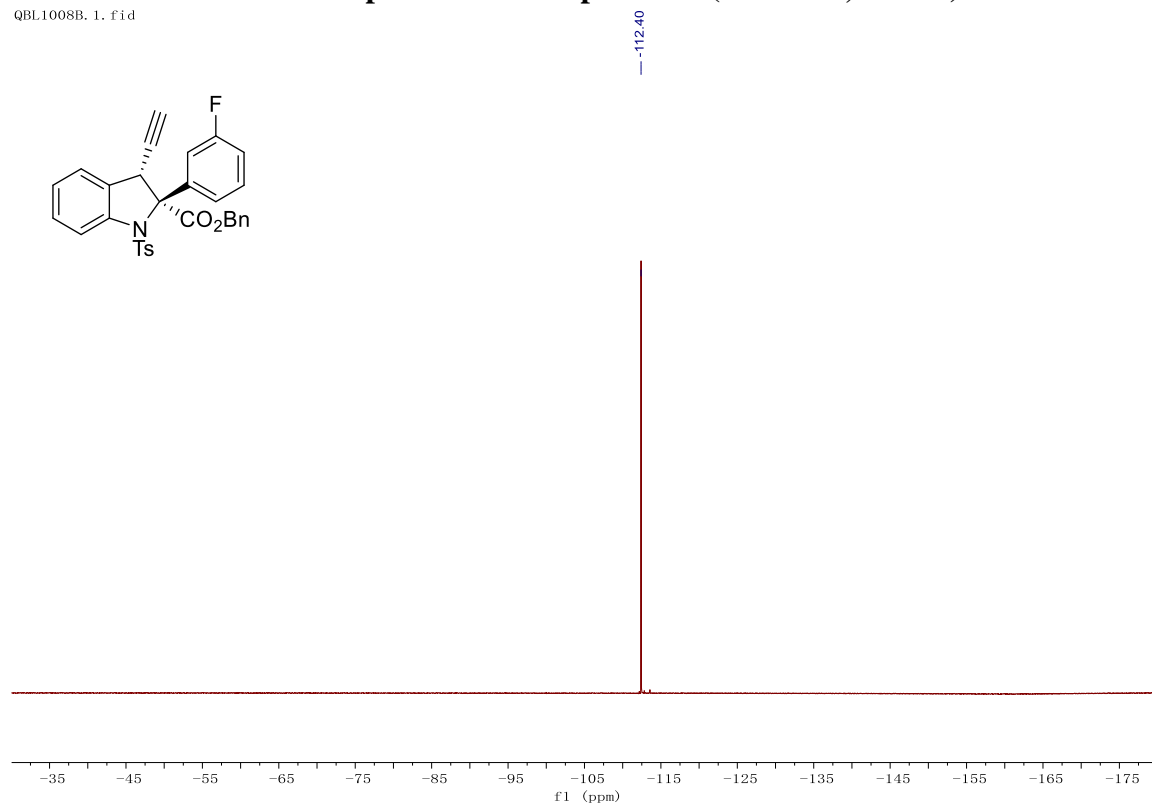

### <sup>1</sup>H NMR spectrum of compound 3j (400 MHz, CDCl<sub>3</sub>)

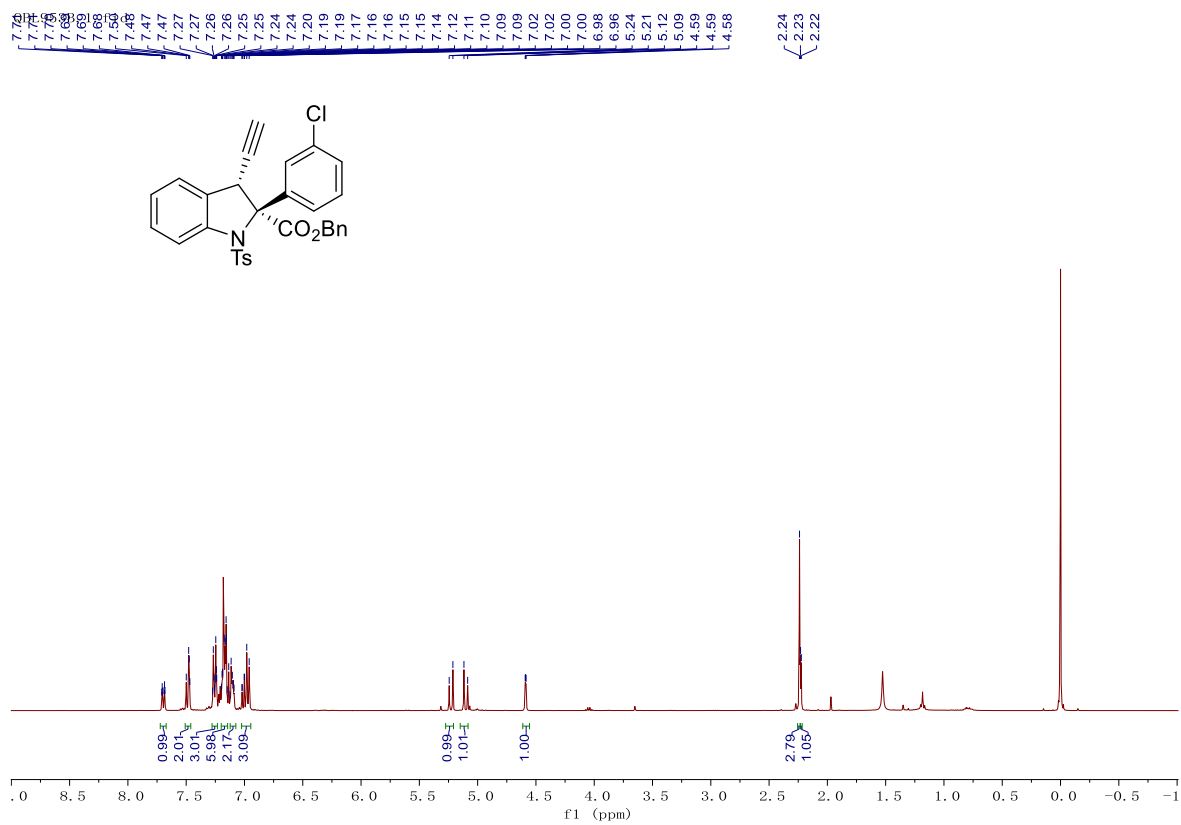

### <sup>13</sup>C NMR spectrum of compound 3j (100 MHz, CDCl<sub>3</sub>)

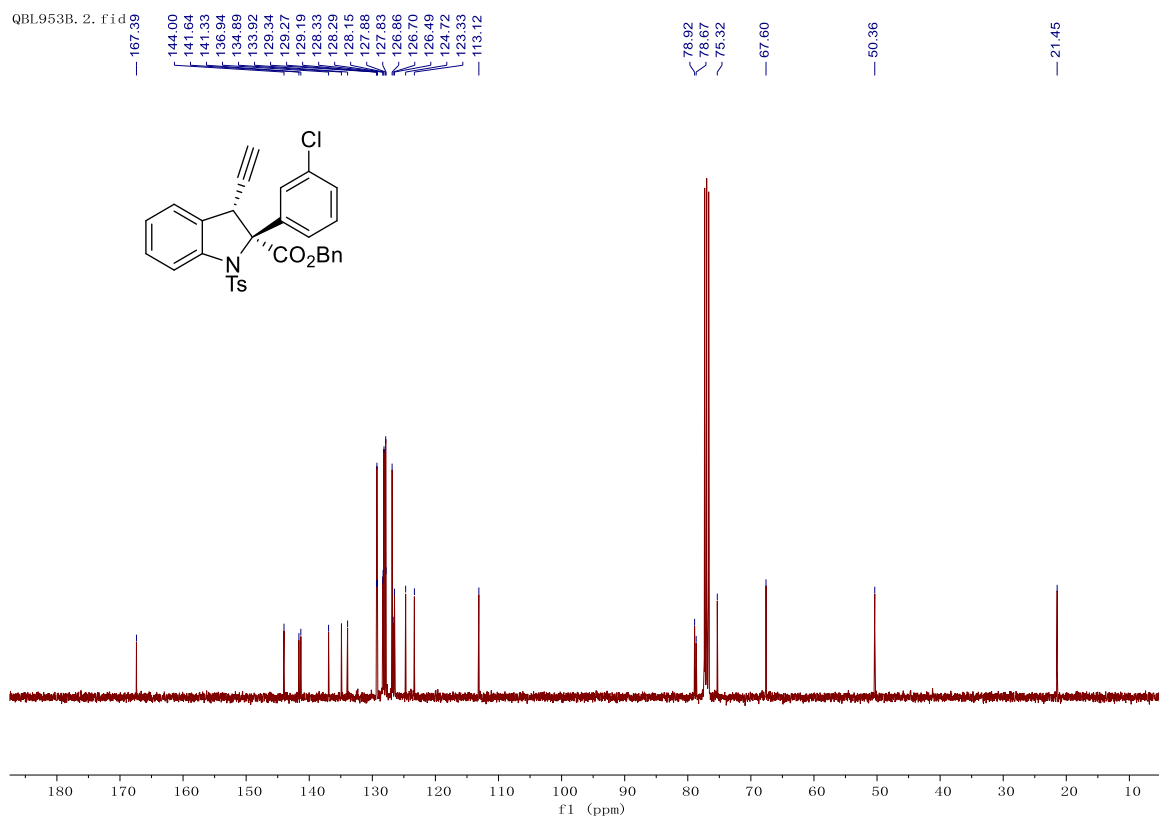

### <sup>1</sup>H NMR spectrum of compound 3k (400 MHz, CDCl<sub>3</sub>)

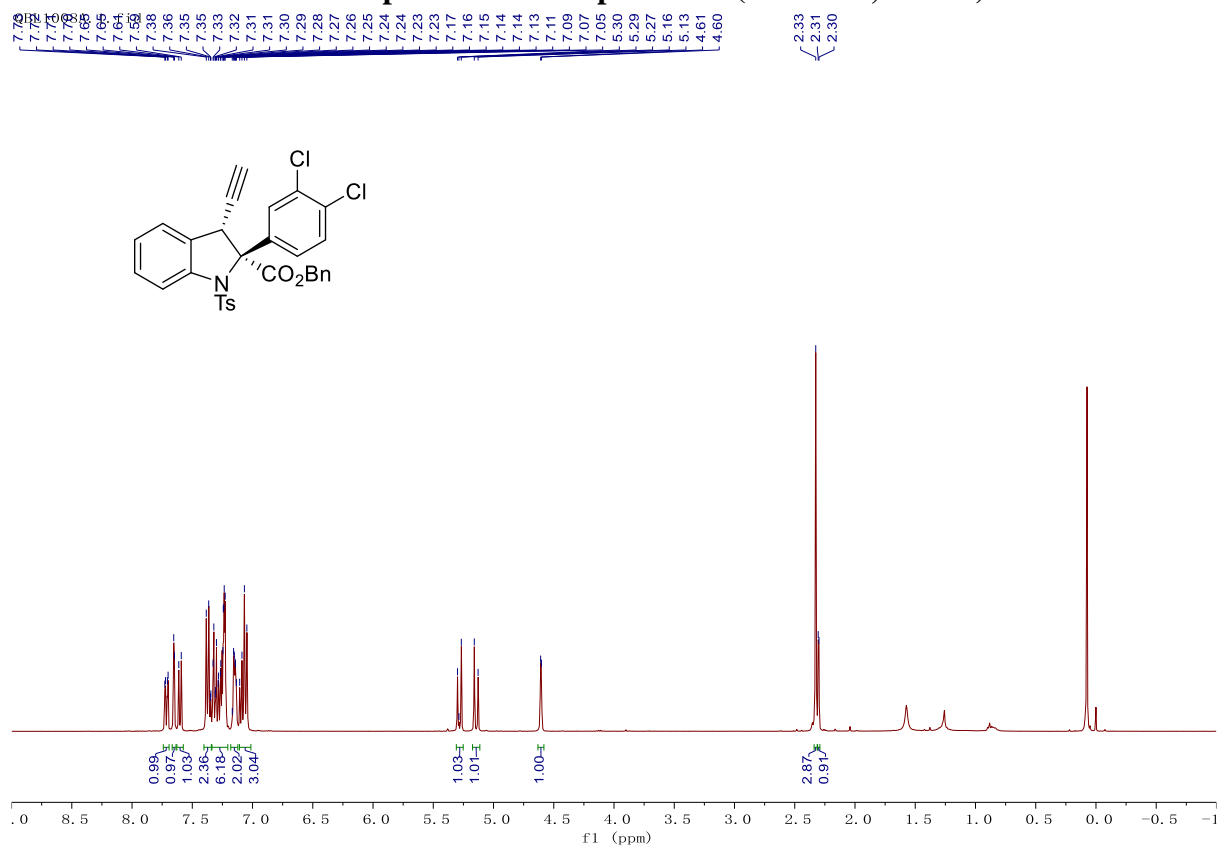

### <sup>13</sup>C NMR spectrum of compound 3k (100 MHz, CDCl<sub>3</sub>)

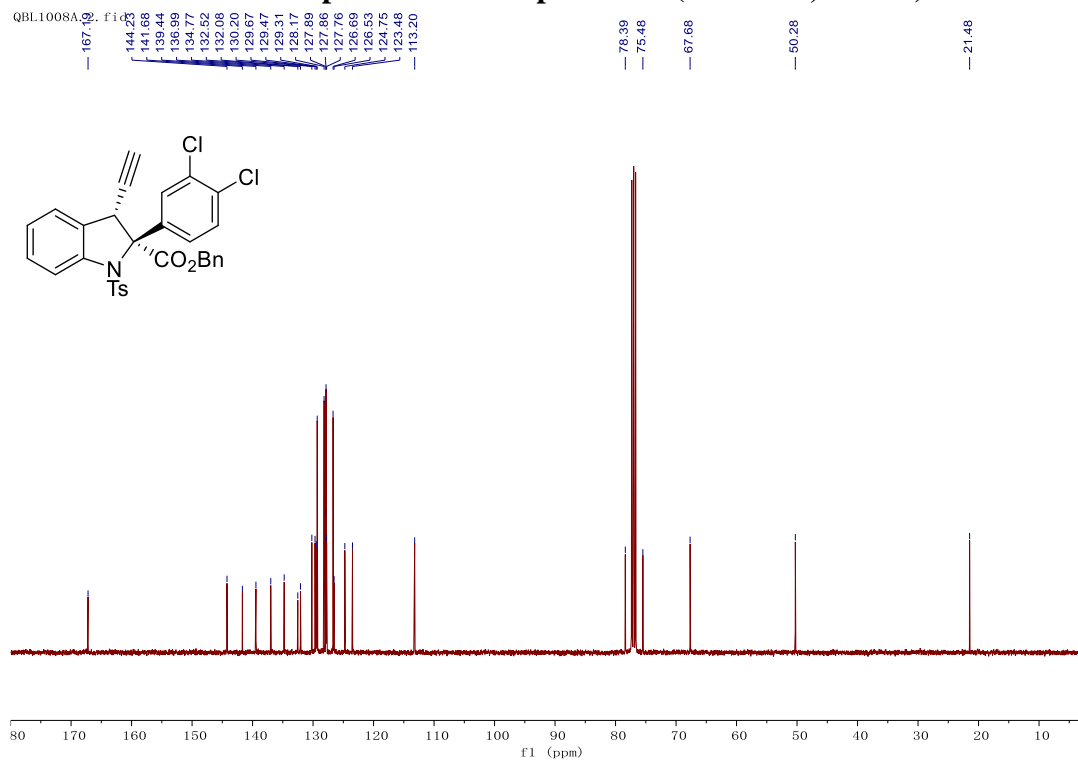

### <sup>1</sup>H NMR spectrum of compound 3l (400 MHz, CDCl<sub>3</sub>)

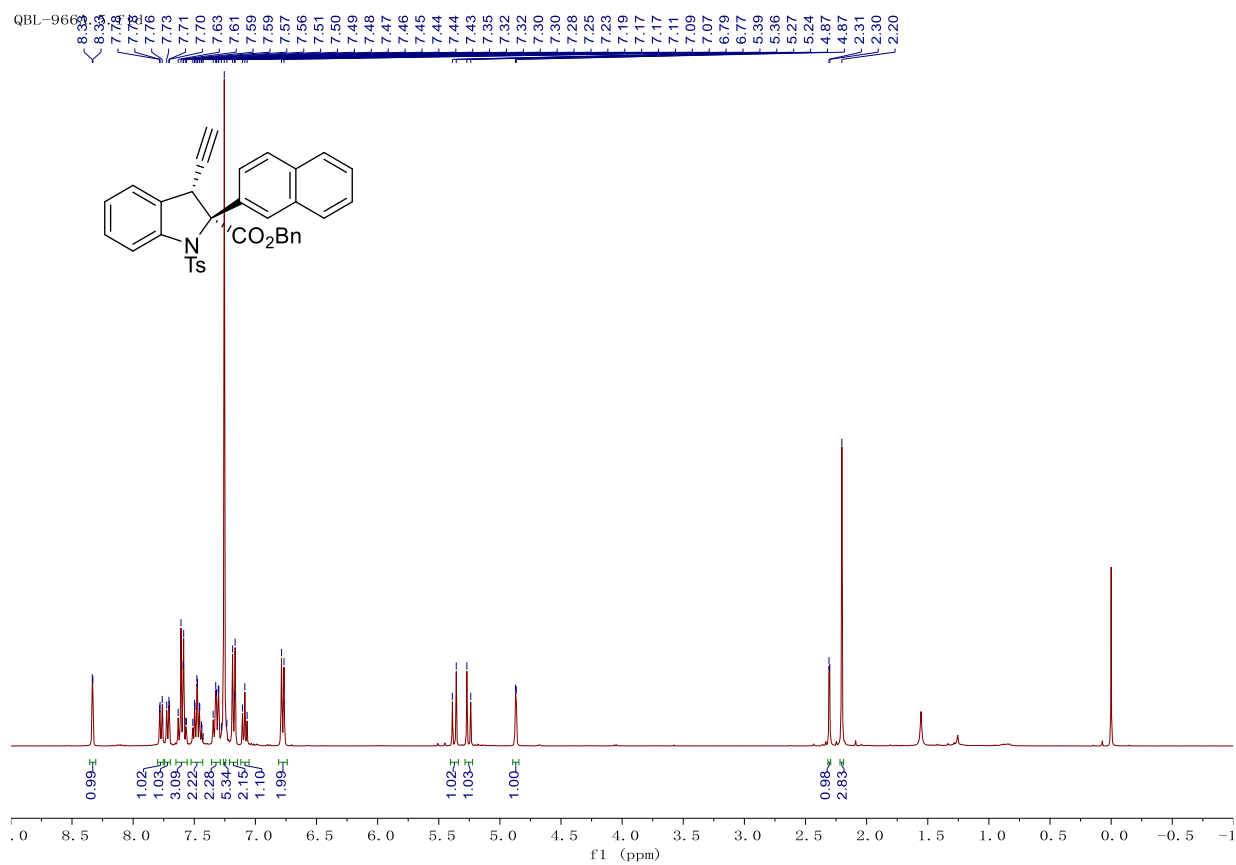



### <sup>13</sup>C NMR spectrum of compound 4l (100 MHz, CDCl<sub>3</sub>)

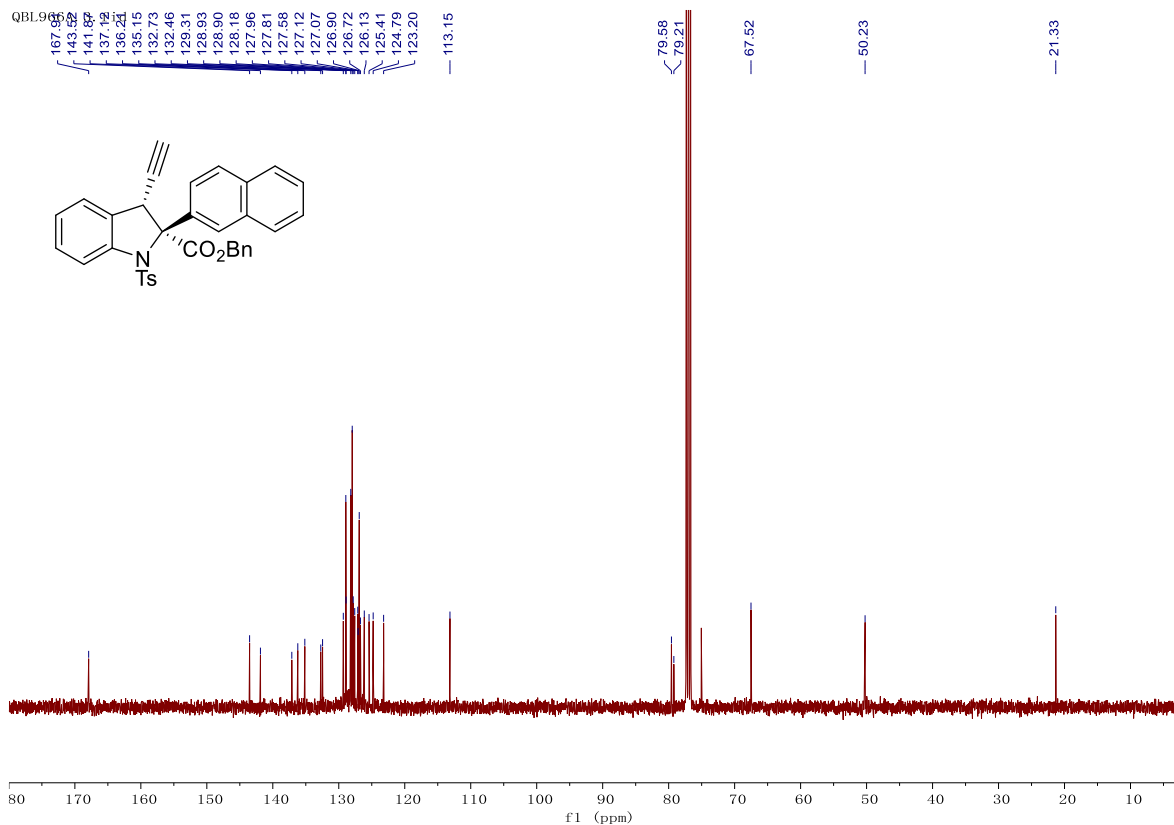

### <sup>1</sup>H NMR spectrum of compound 3m (400 MHz, CDCl<sub>3</sub>)

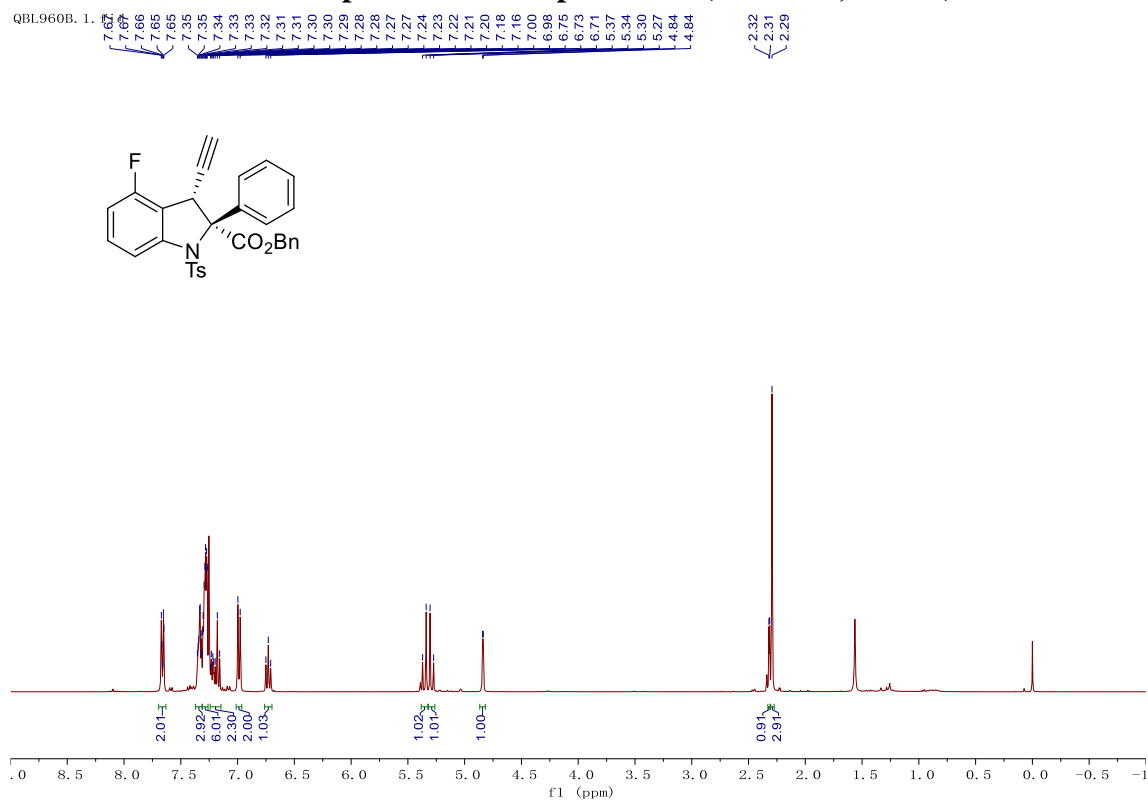

### <sup>13</sup>C NMR spectrum of compound 3m (100 MHz, CDCl<sub>3</sub>)

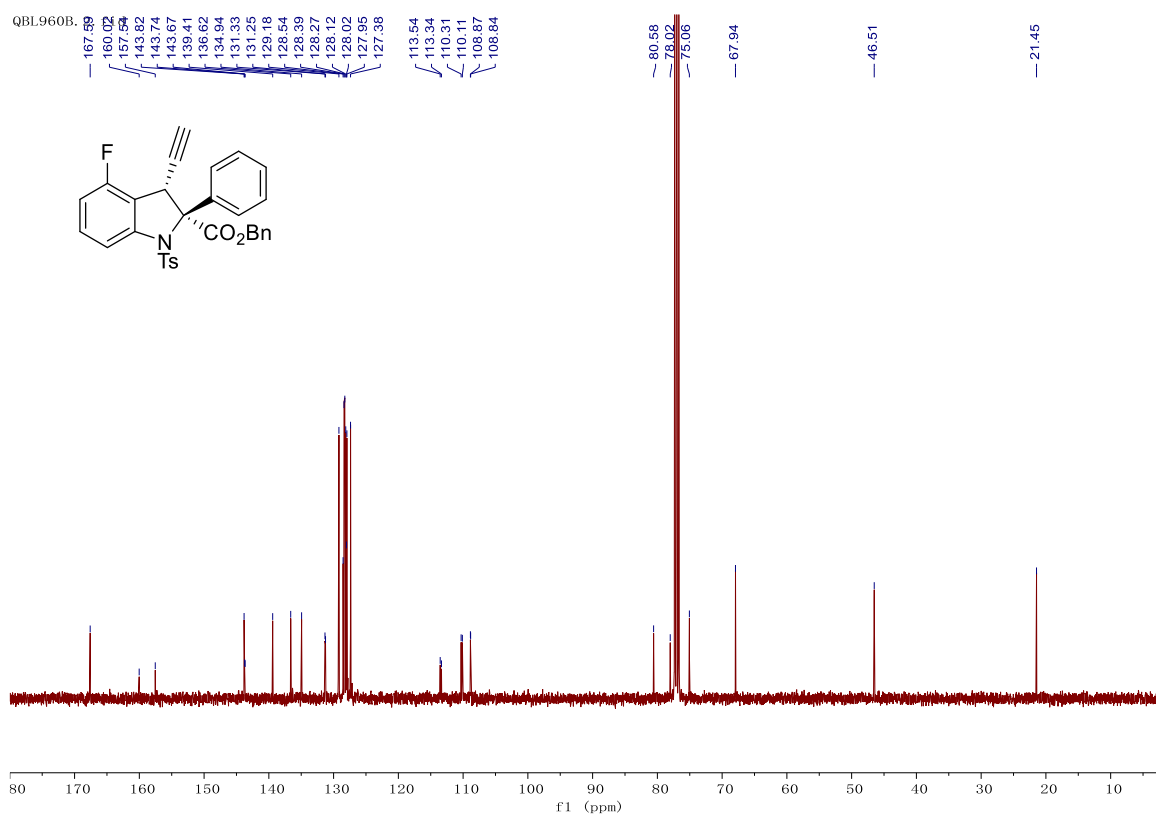

### <sup>19</sup>F NMR spectrum of compound 3m (376 MHz, CDCl<sub>3</sub>)

QBL-960B. 2. fid

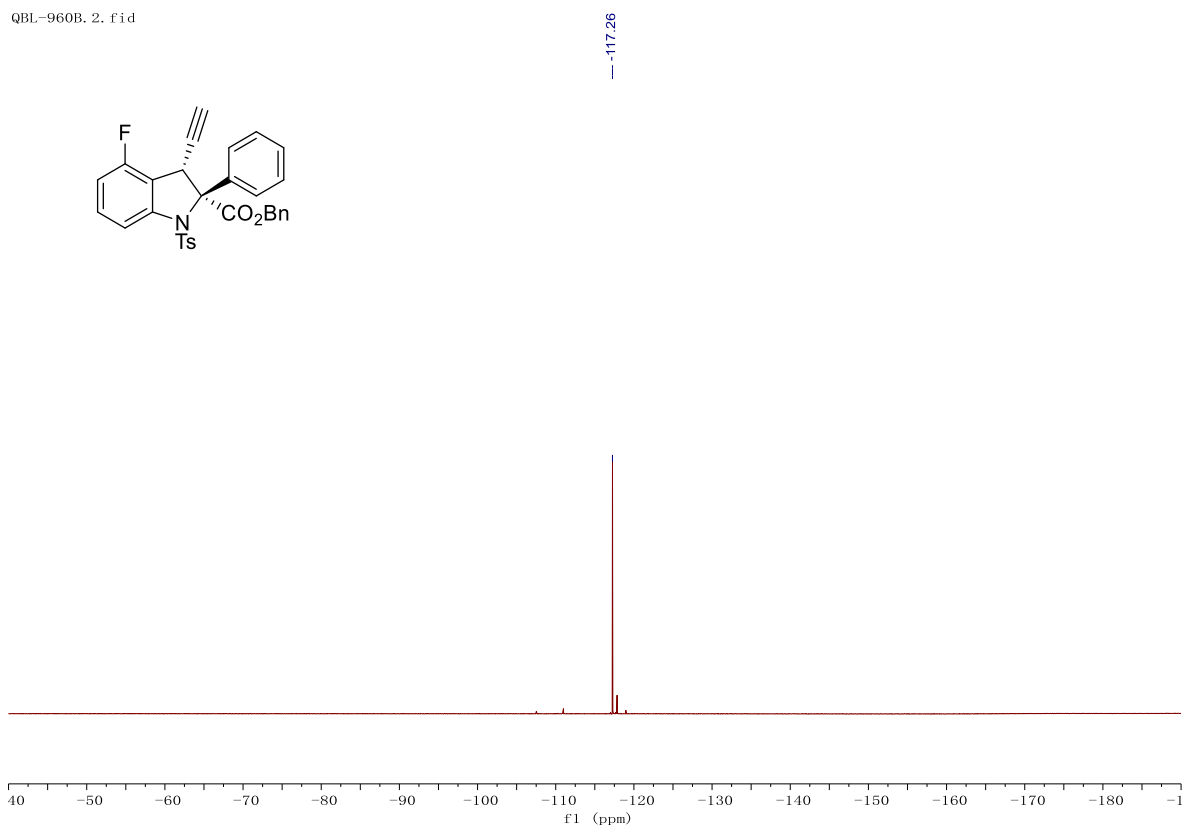

### <sup>1</sup>H NMR spectrum of compound 3n (400 MHz, CDCl<sub>3</sub>)

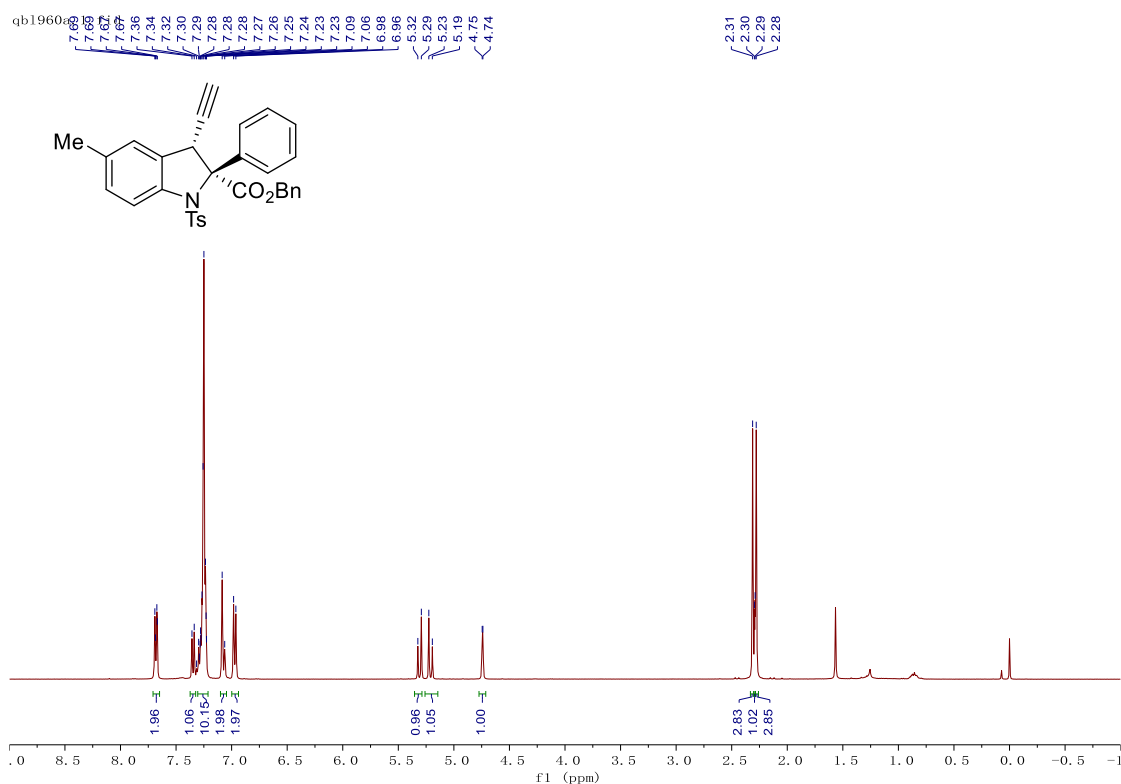

### <sup>13</sup>C NMR spectrum of compound 3n (100 MHz, CDCl<sub>3</sub>)

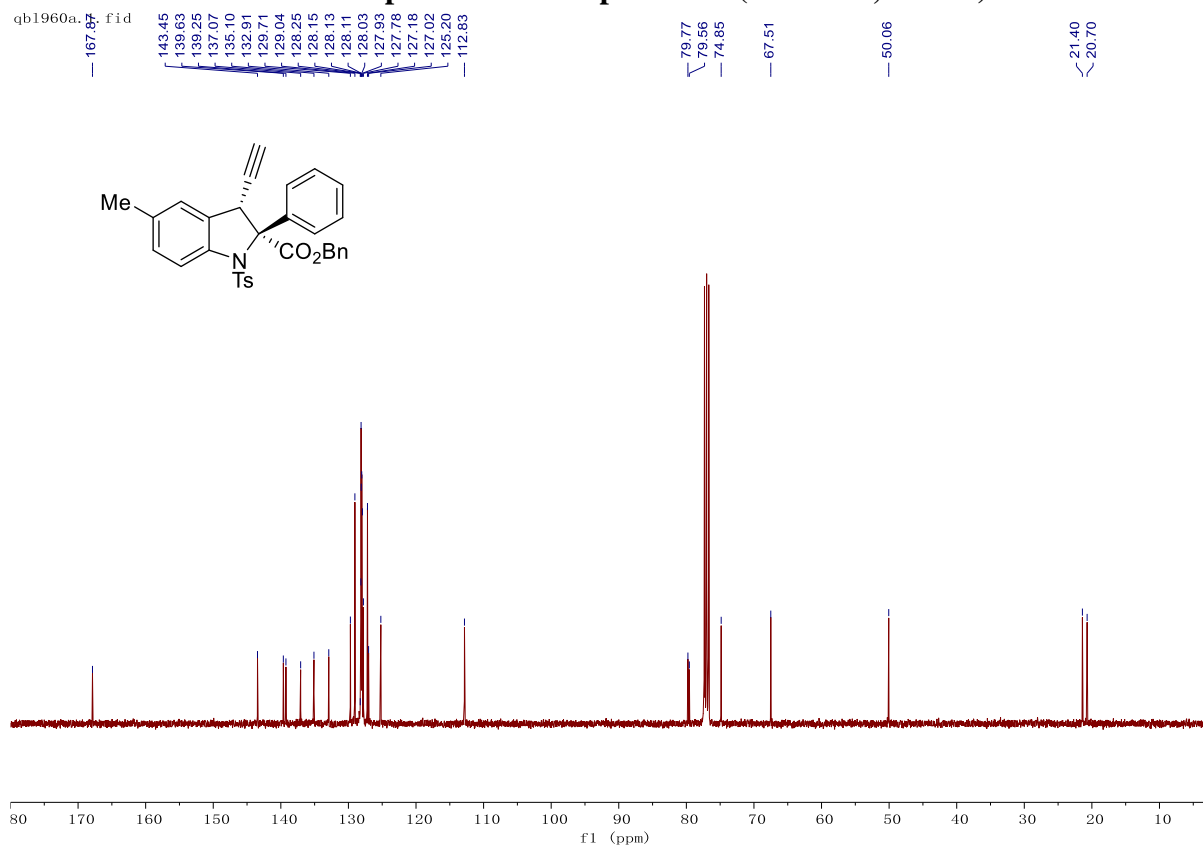

### <sup>1</sup>H NMR spectrum of compound 3o (400 MHz, CDCl<sub>3</sub>)

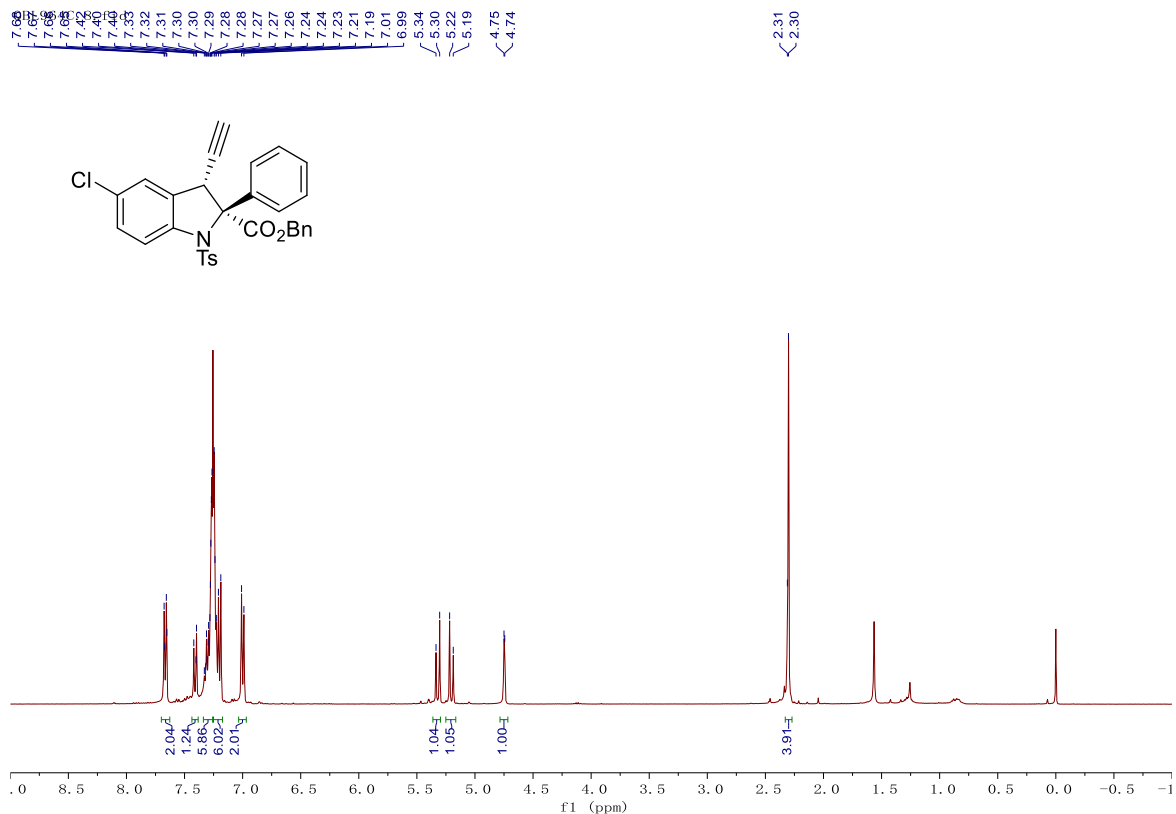

### <sup>13</sup>C NMR spectrum of compound 3o (100 MHz, CDCl<sub>3</sub>)

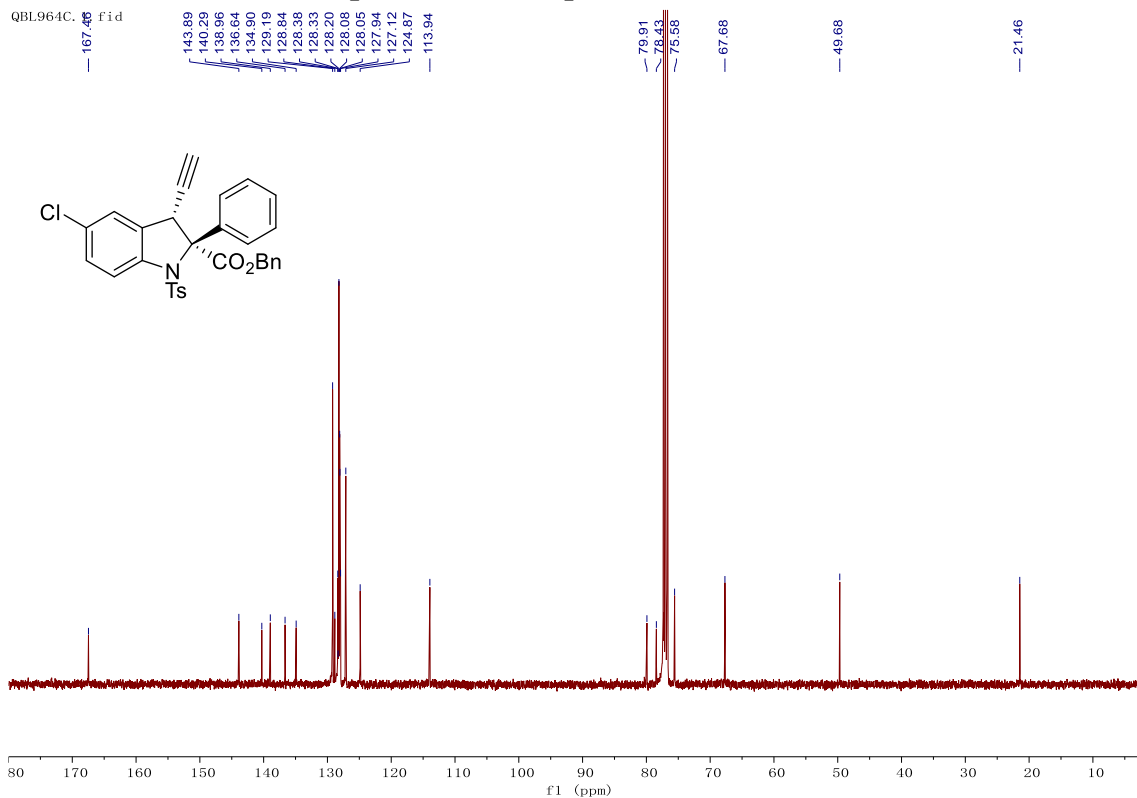

### <sup>1</sup>H NMR spectrum of compound 3p (400 MHz, CDCl<sub>3</sub>)

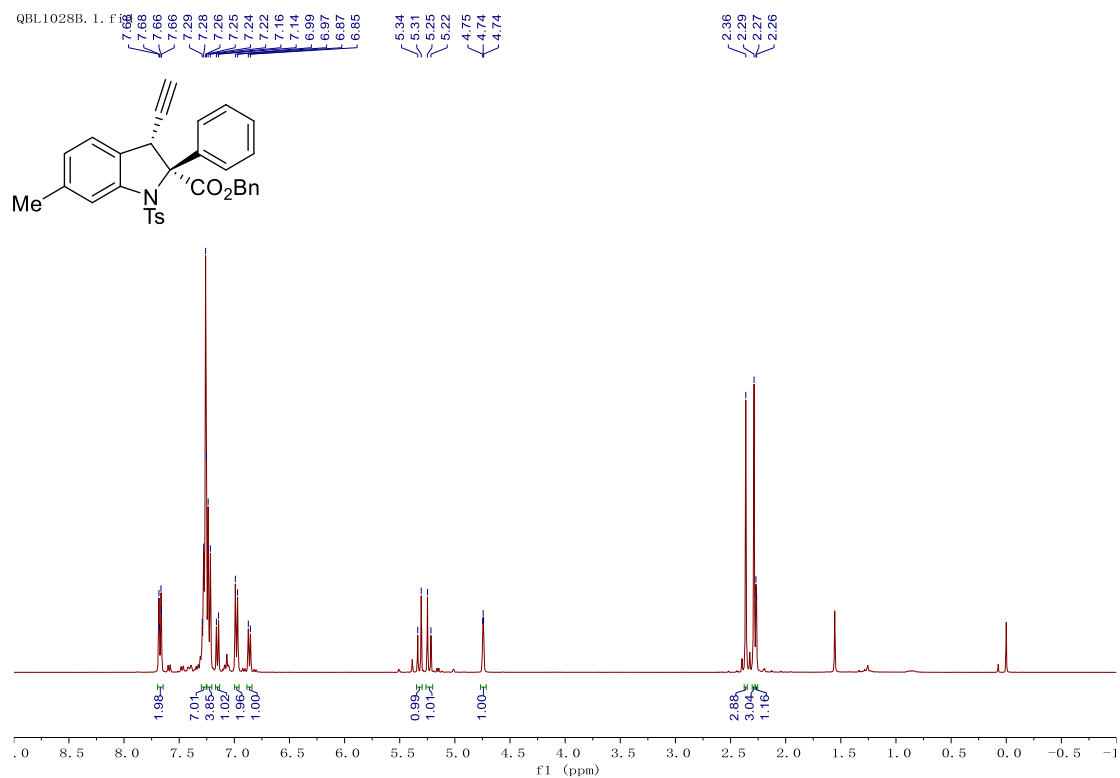

### <sup>13</sup>C NMR spectrum of compound 3p (100 MHz, CDCl<sub>3</sub>)

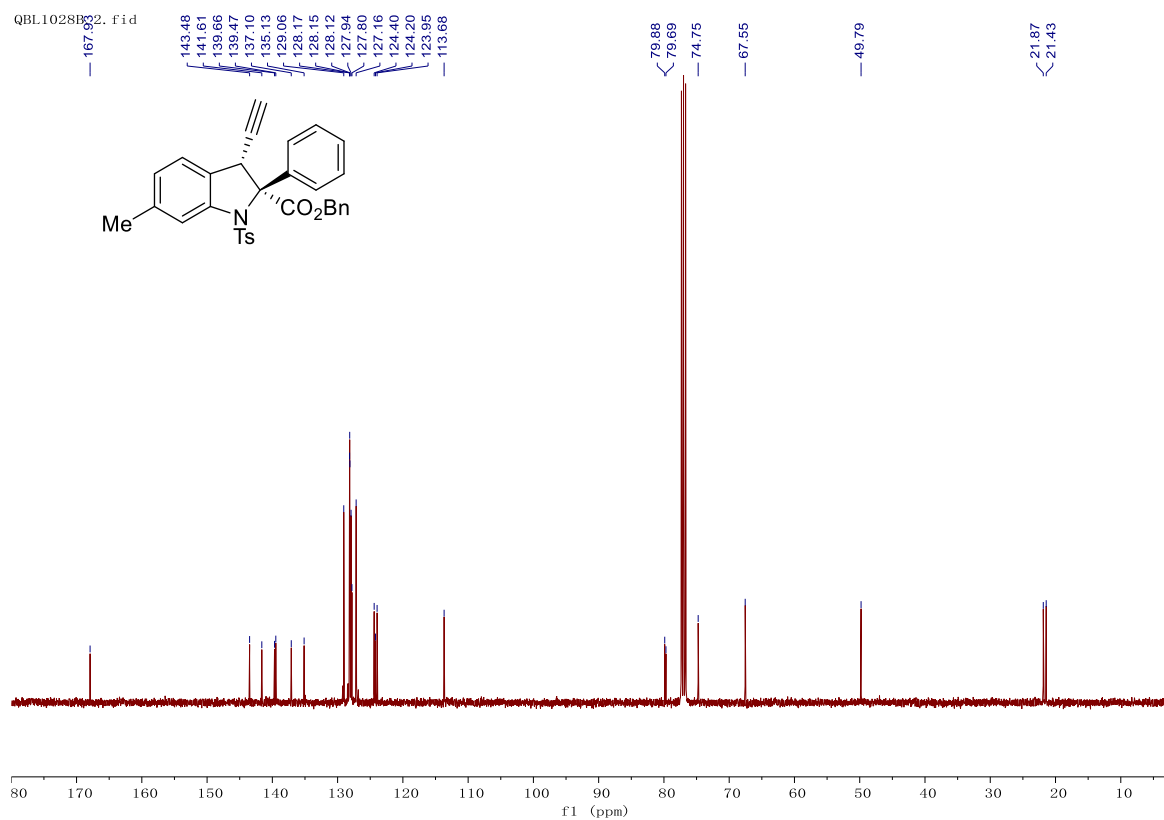

### <sup>1</sup>H NMR spectrum of compound 3q (400 MHz, CDCl<sub>3</sub>)

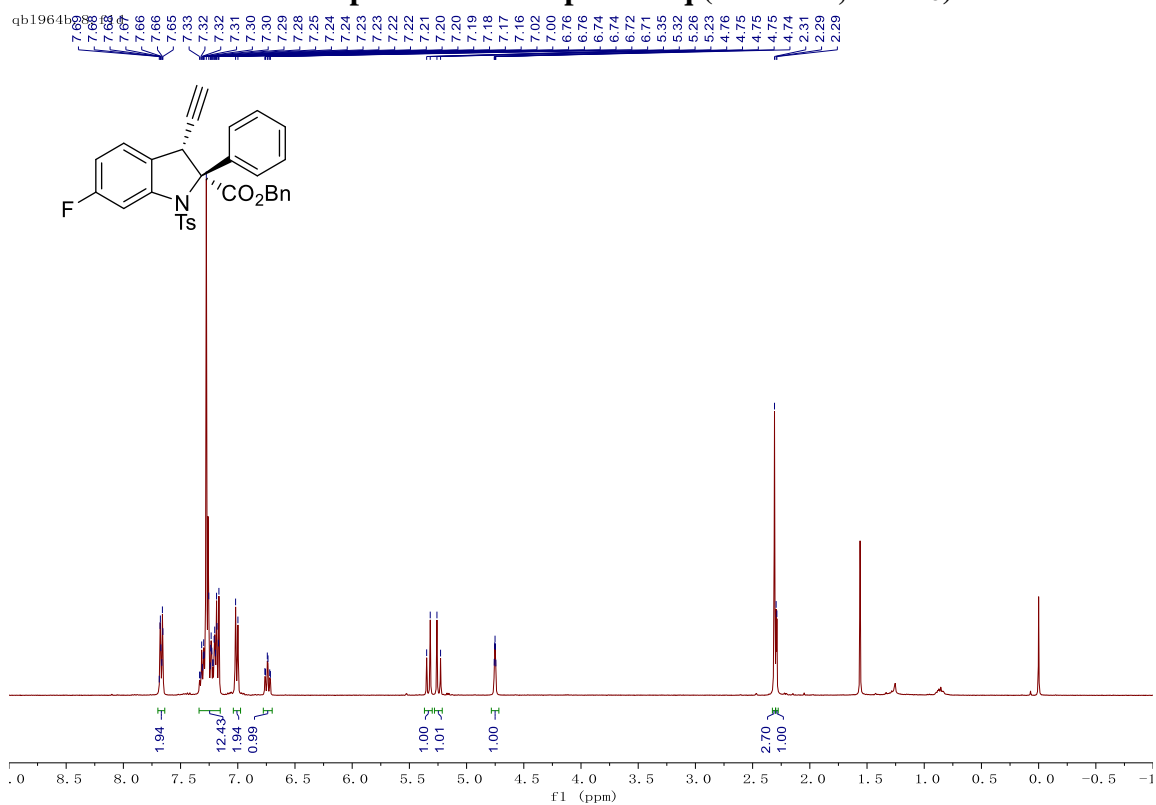

### <sup>13</sup>C NMR spectrum of compound 3q (400 MHz, CDCl<sub>3</sub>)

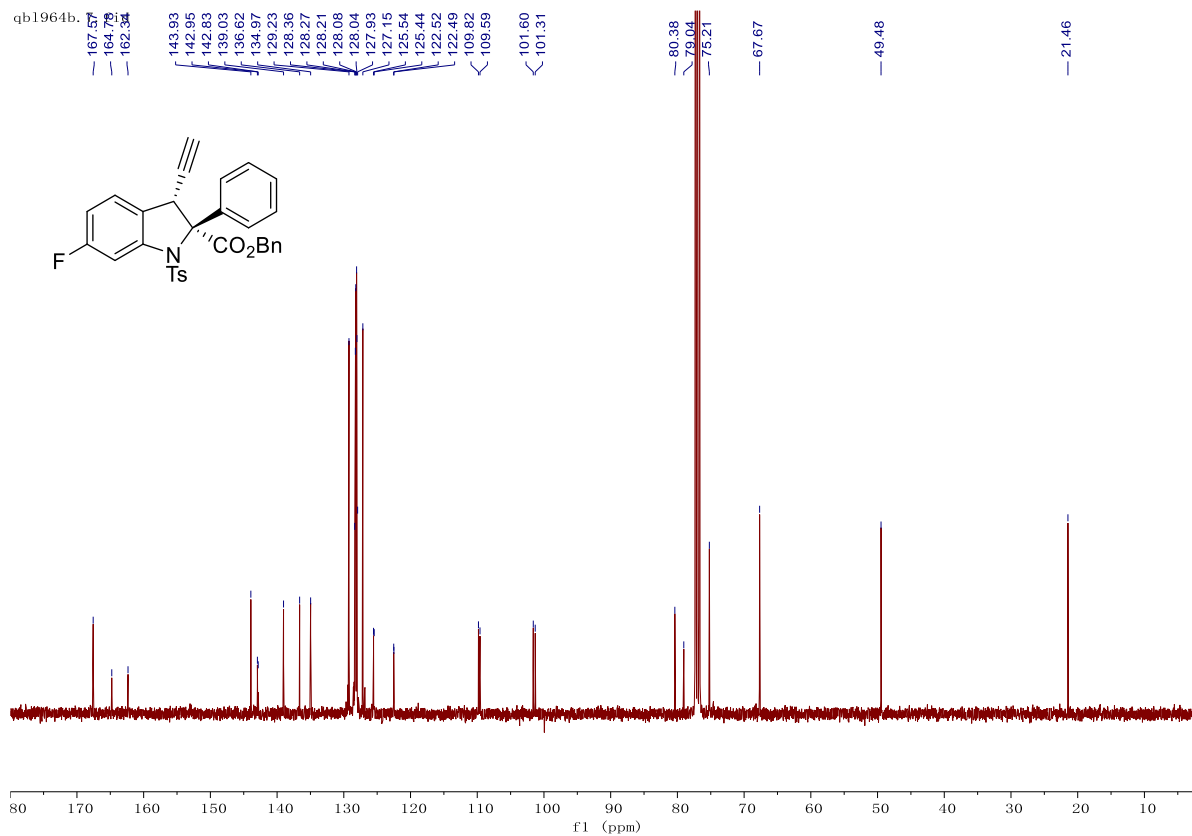

### <sup>19</sup>F NMR spectrum of compound 3q (376 MHz, CDCl<sub>3</sub>)

qb1964b.9.fid

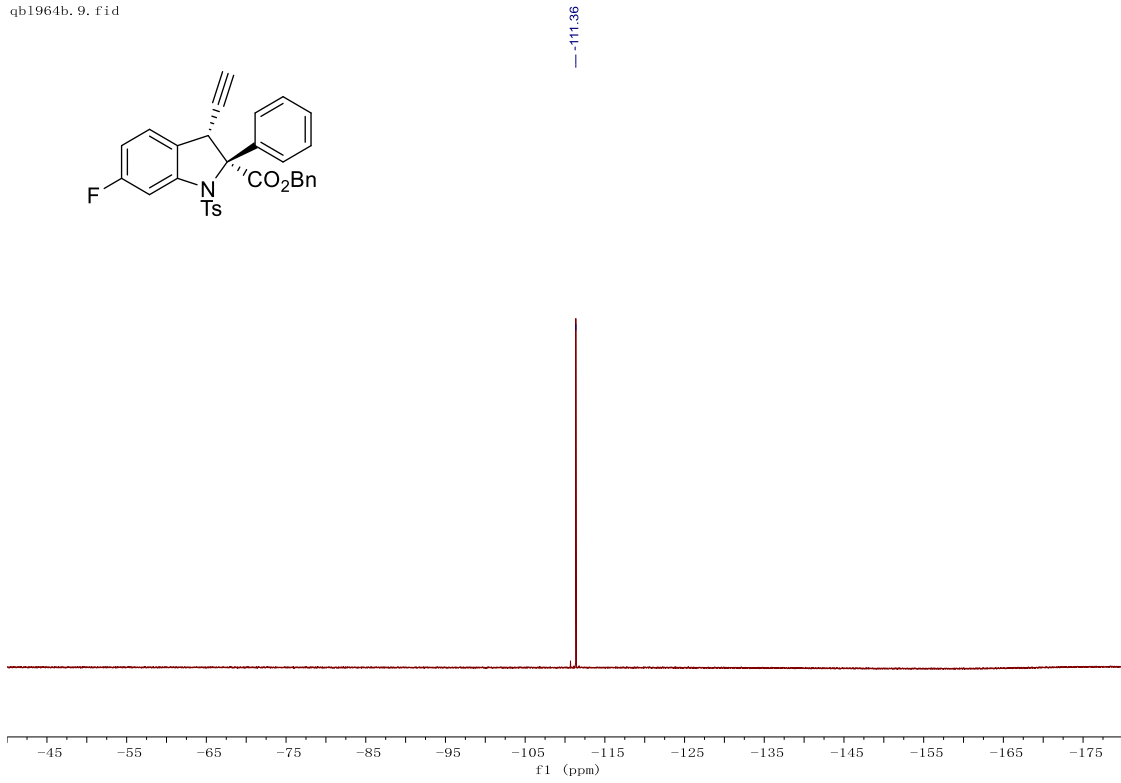

### <sup>1</sup>H NMR spectrum of compound 3r (400 MHz, CDCl<sub>3</sub>)

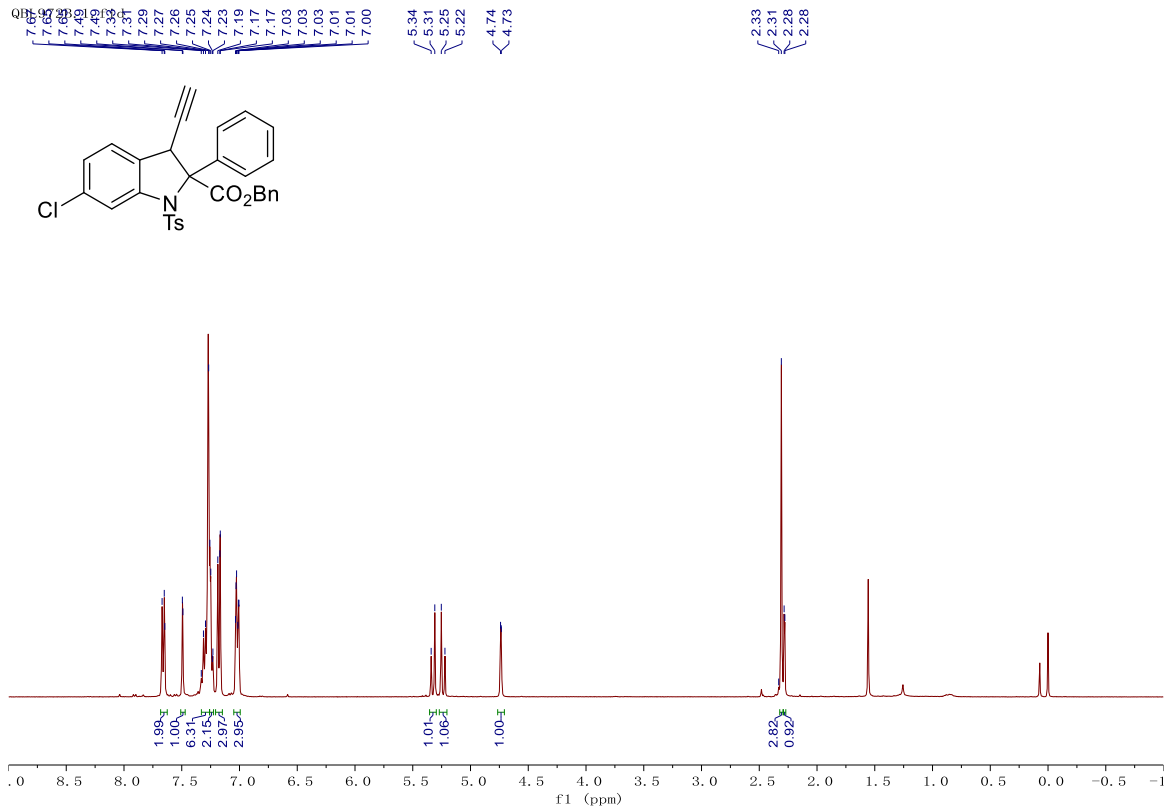





### <sup>13</sup>C NMR spectrum of compound 3s (100 MHz, CDCl<sub>3</sub>)

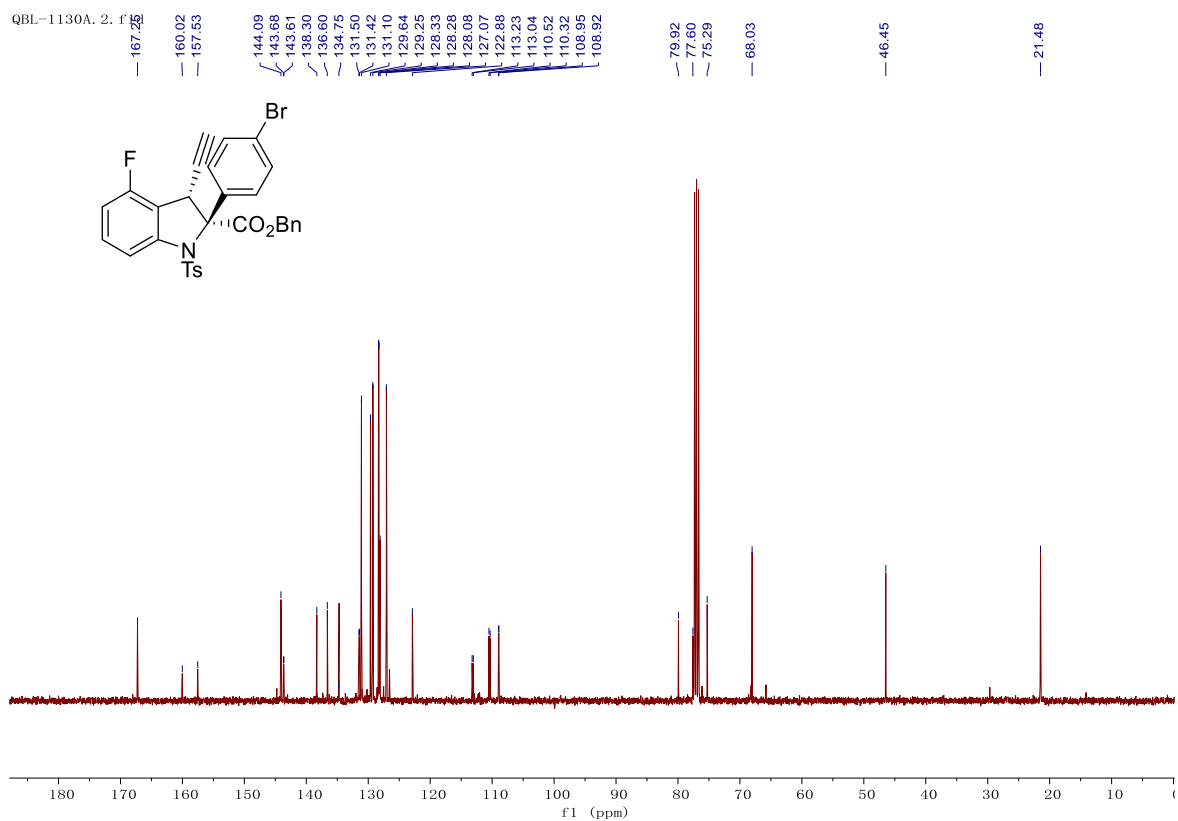

### <sup>19</sup>F NMR spectrum of compound 3s (376 MHz, CDCl<sub>3</sub>)

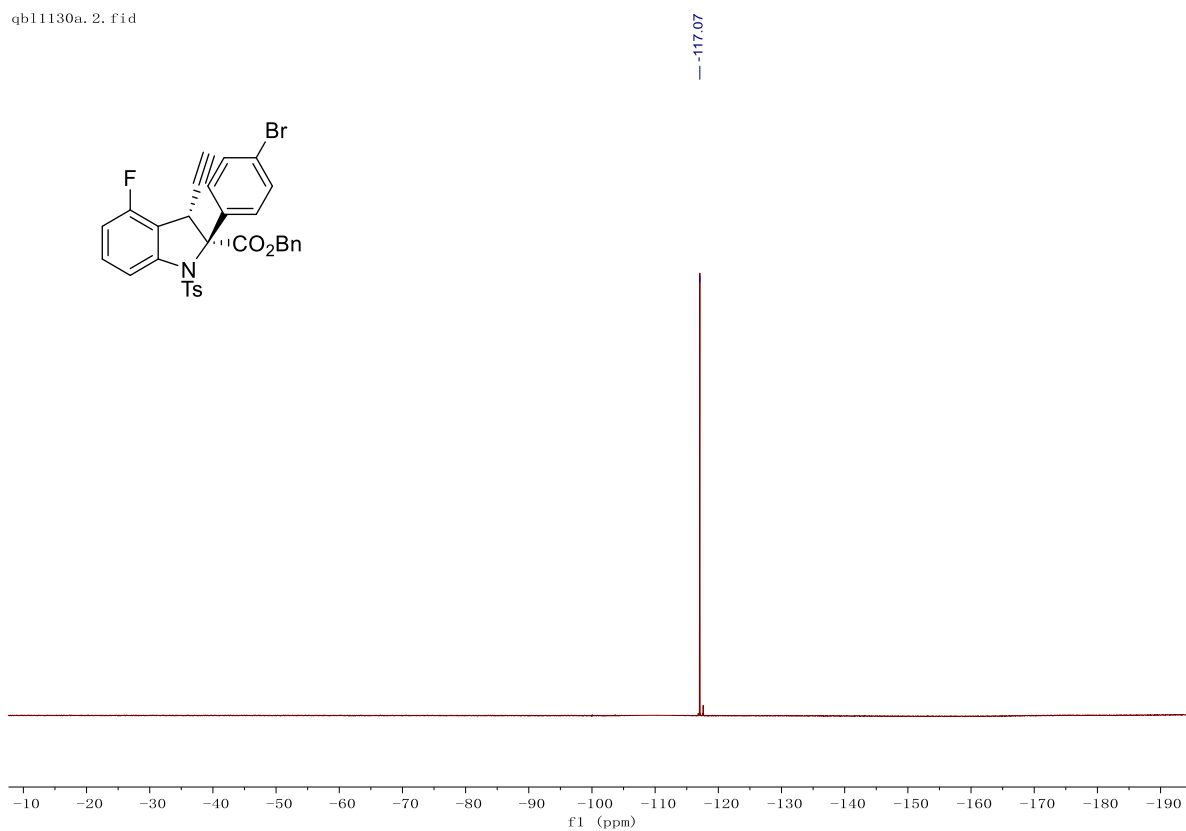

### <sup>1</sup>H NMR spectrum of compound 3t (400 MHz, CDCl<sub>3</sub>)

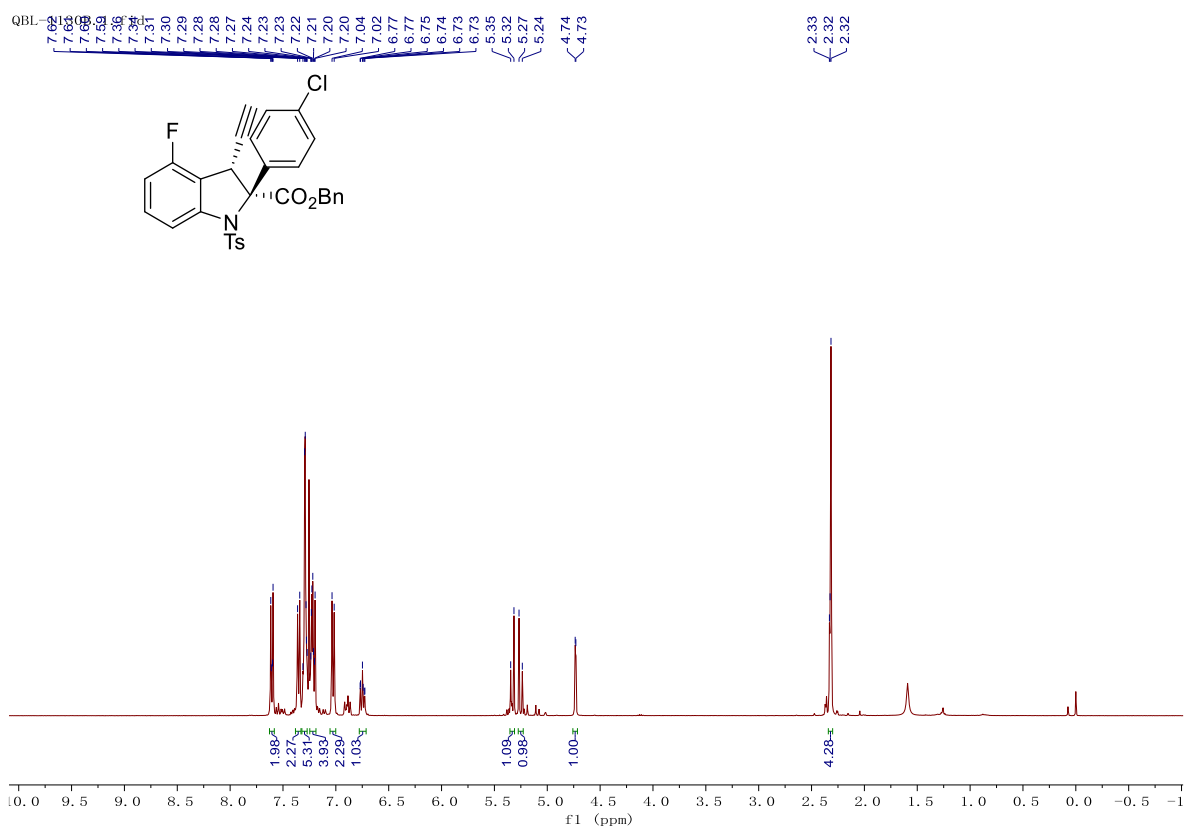

### <sup>13</sup>C NMR spectrum of compound 3t (100 MHz, CDCl<sub>3</sub>)

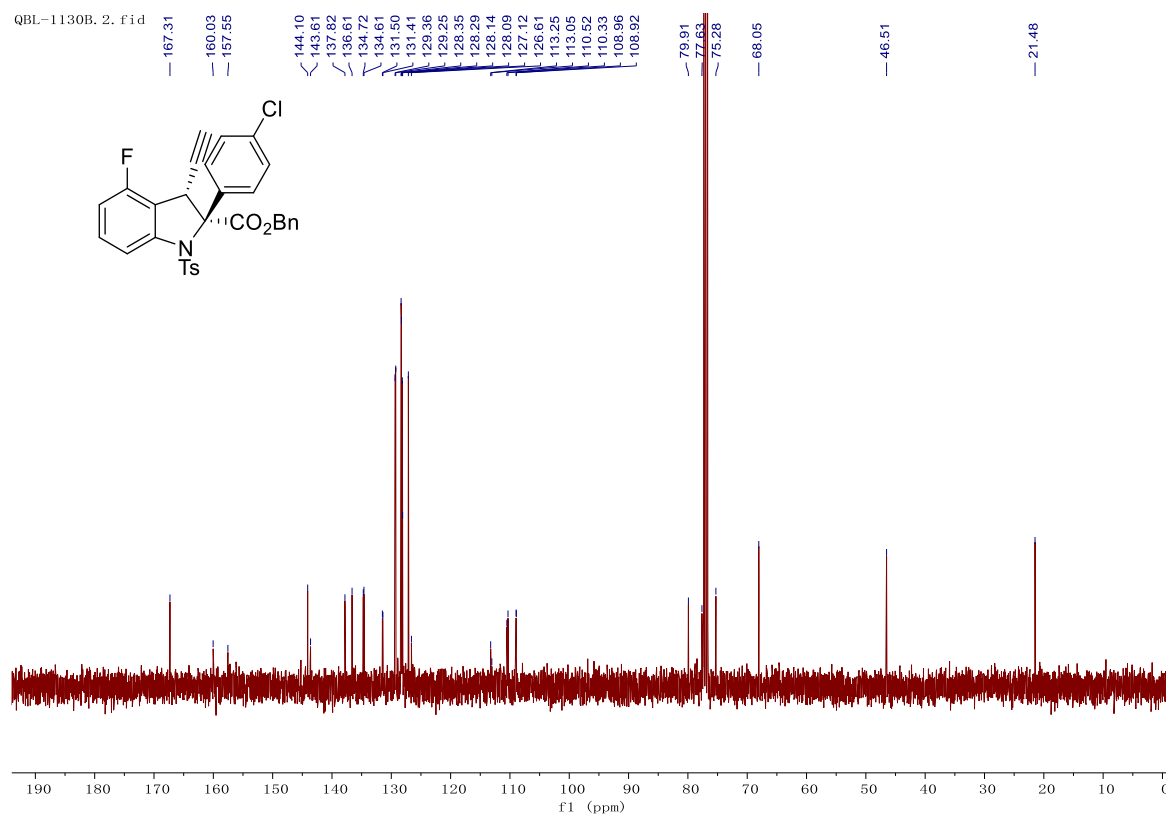

### $^{19}\text{F}$ NMR spectrum of compound 3t (376 MHz, $\text{CDCl}_3$ )

QBL-1130B. 3. fid

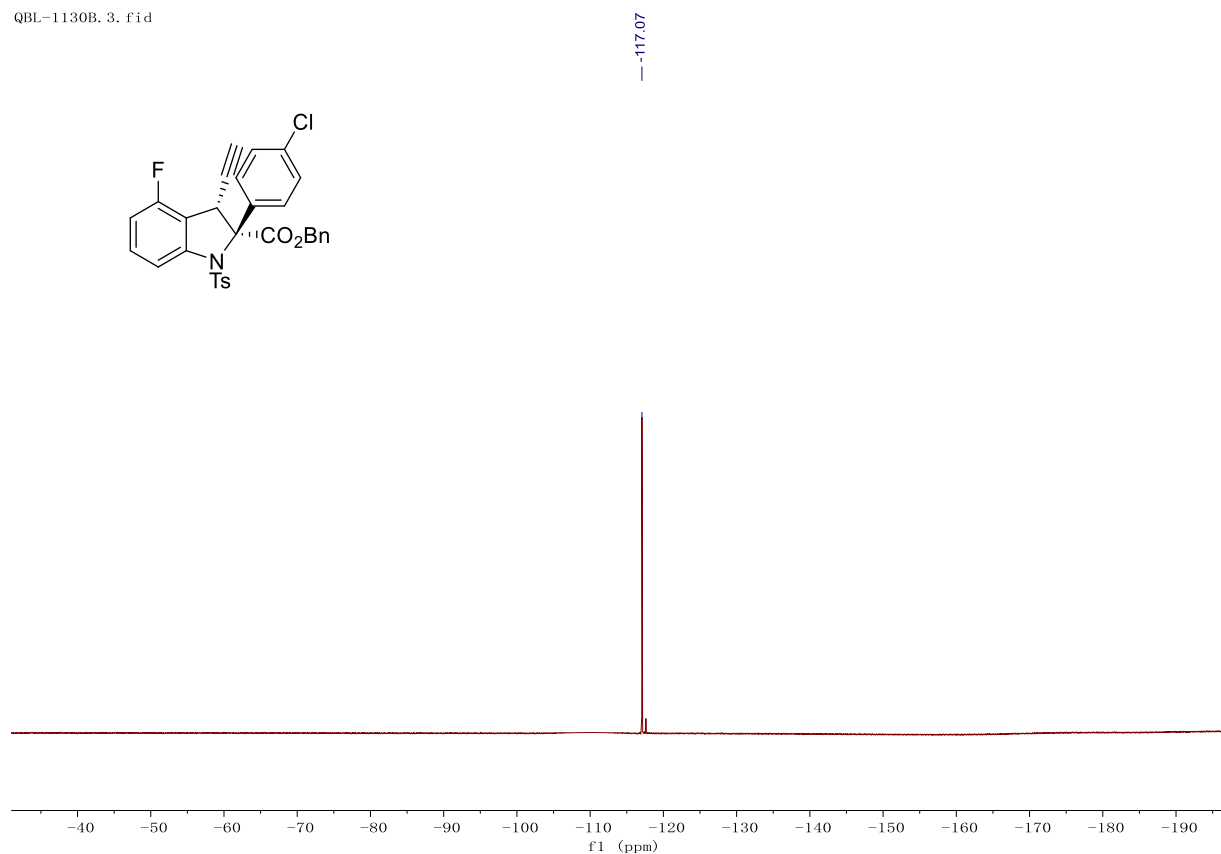

### $^1\text{H}$ NMR spectrum of compound 3u (400 MHz, $\text{CDCl}_3$ )

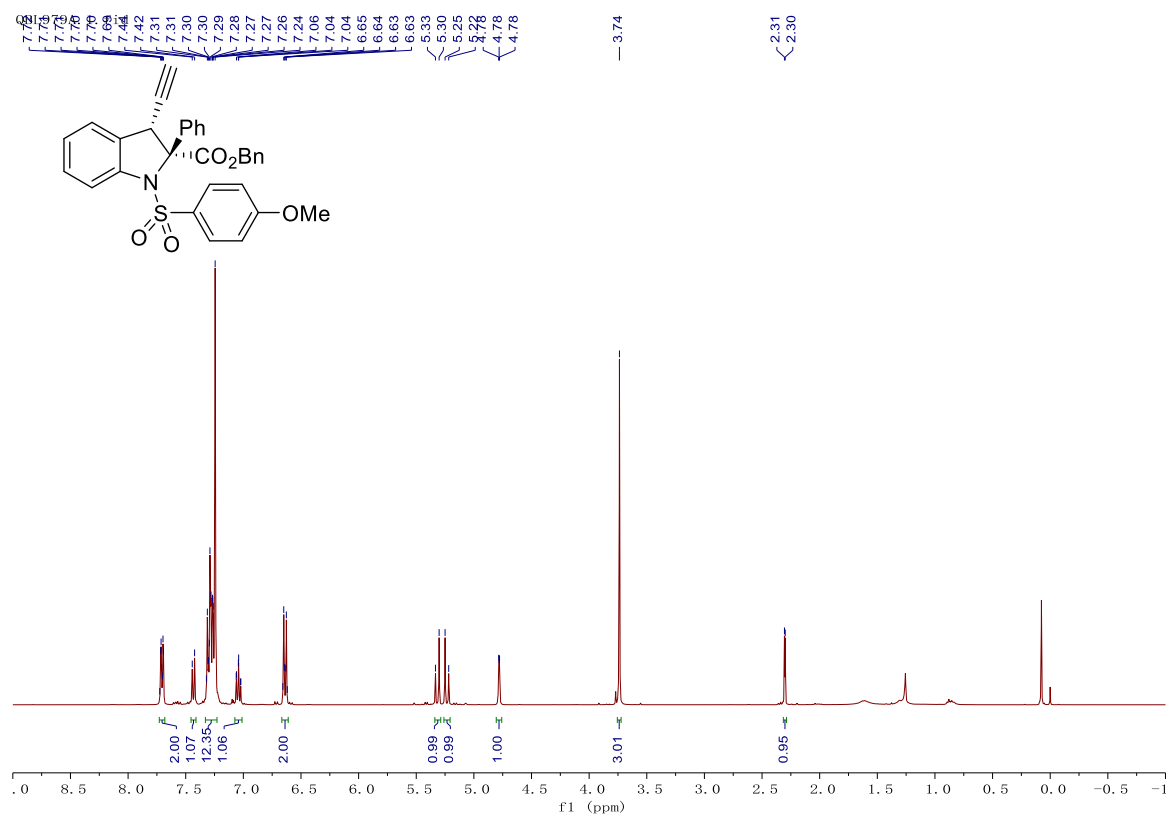

### <sup>13</sup>C NMR spectrum of compound 3u (100 MHz, CDCl<sub>3</sub>)

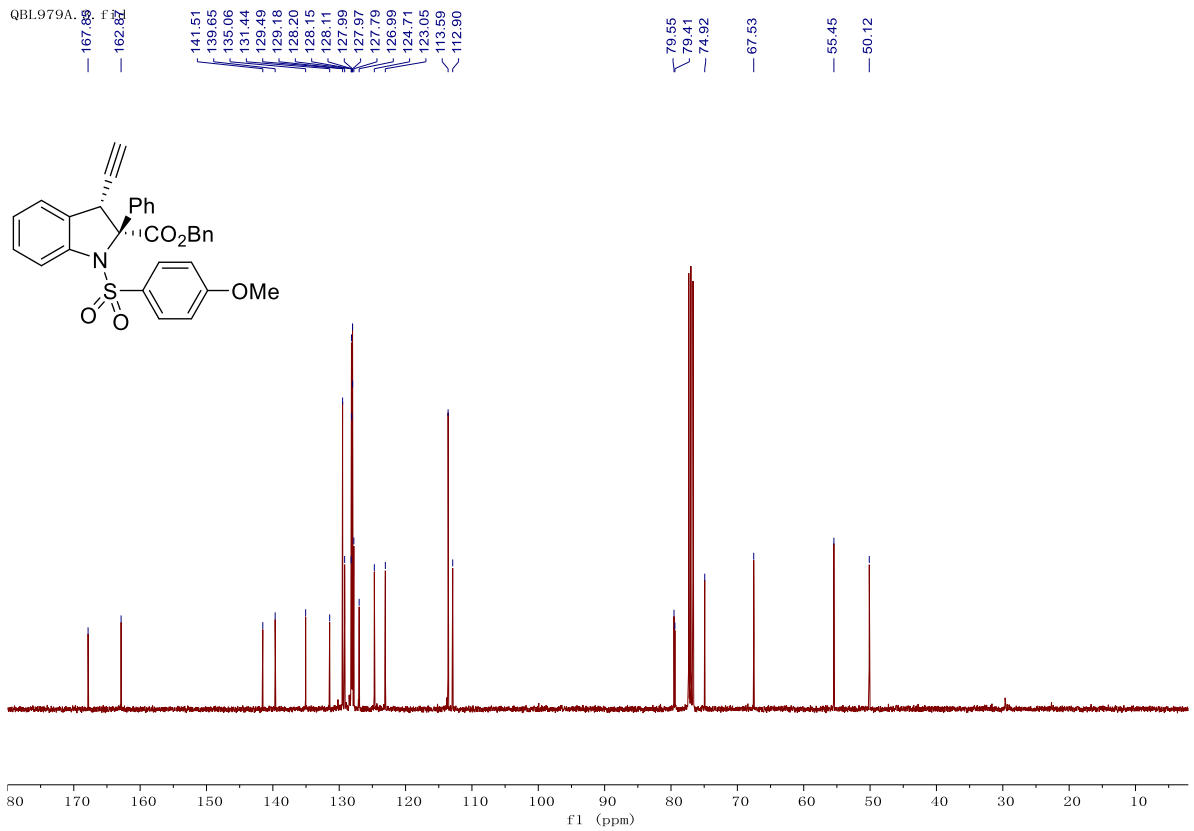

### <sup>1</sup>H NMR spectrum of compound 3v (400 MHz, CDCl<sub>3</sub>)

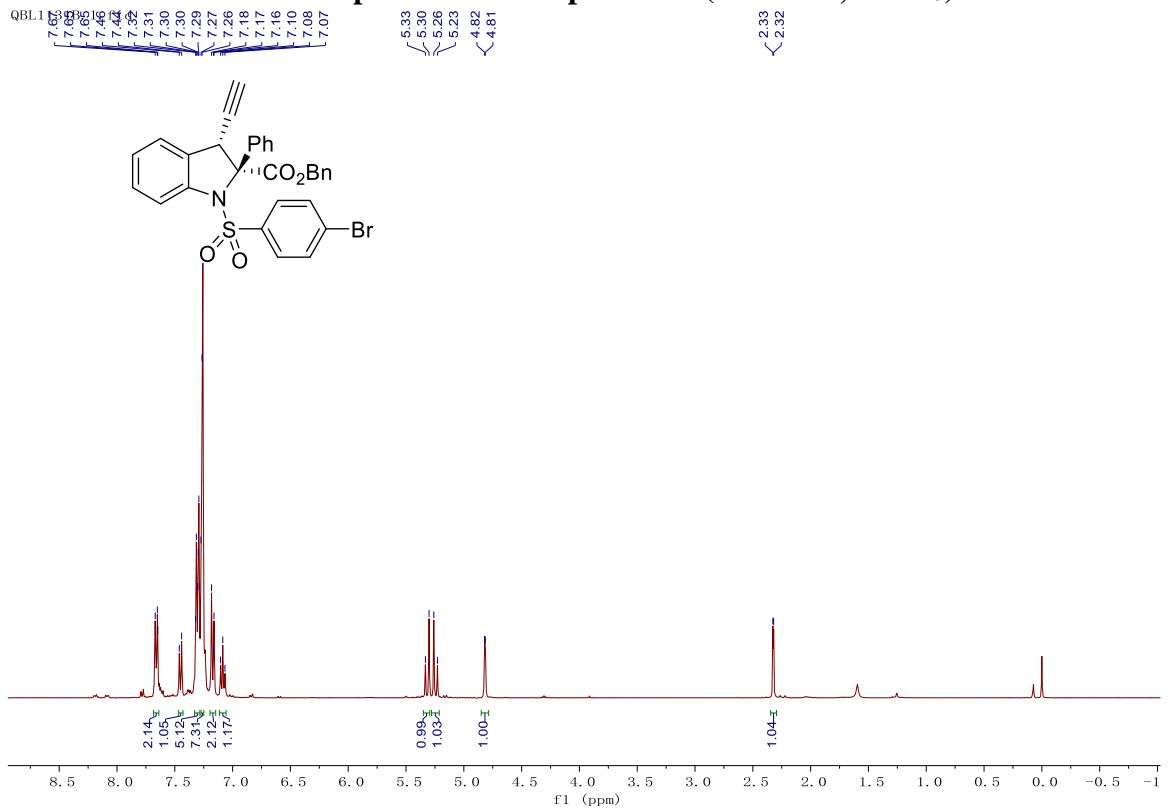

### <sup>13</sup>C NMR spectrum of compound 3v (100 MHz, CDCl<sub>3</sub>)

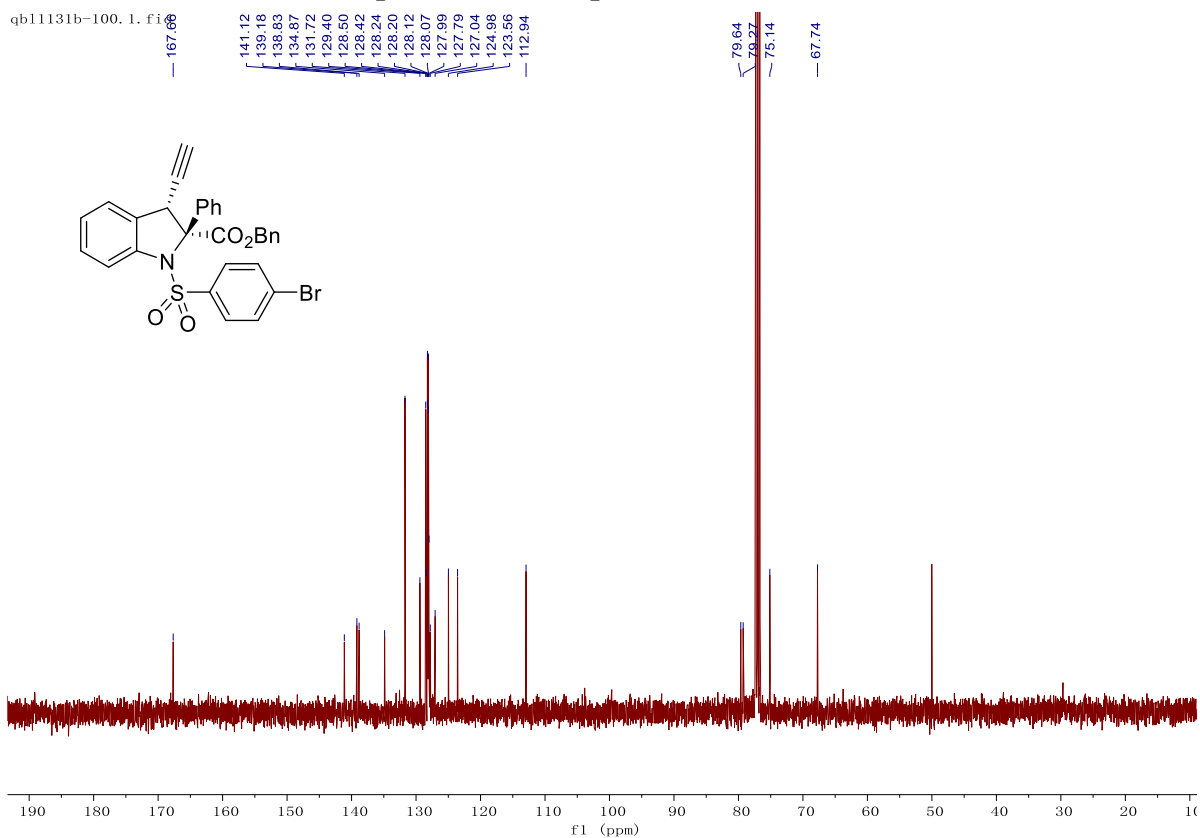

### <sup>1</sup>H NMR spectrum of compound 3w (400 MHz, CDCl<sub>3</sub>)

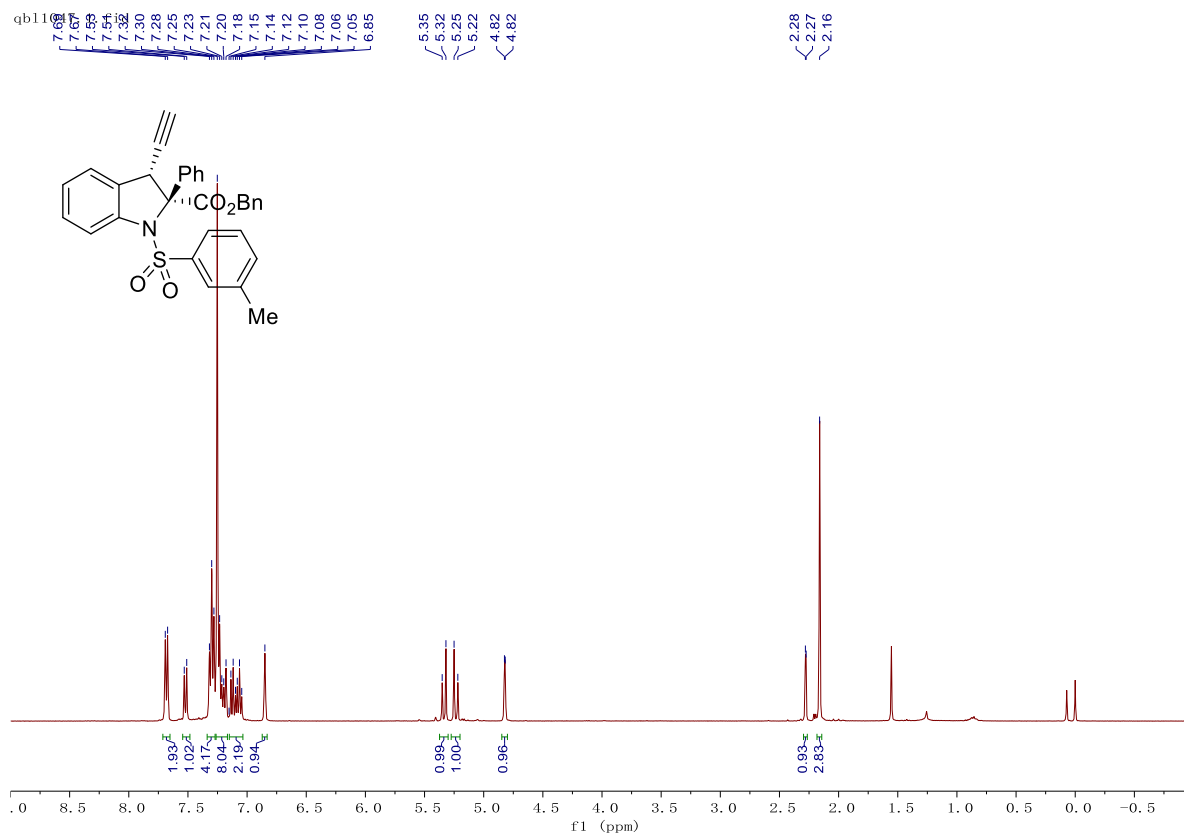

### <sup>13</sup>C NMR spectrum of compound 3w (100 MHz, CDCl<sub>3</sub>)

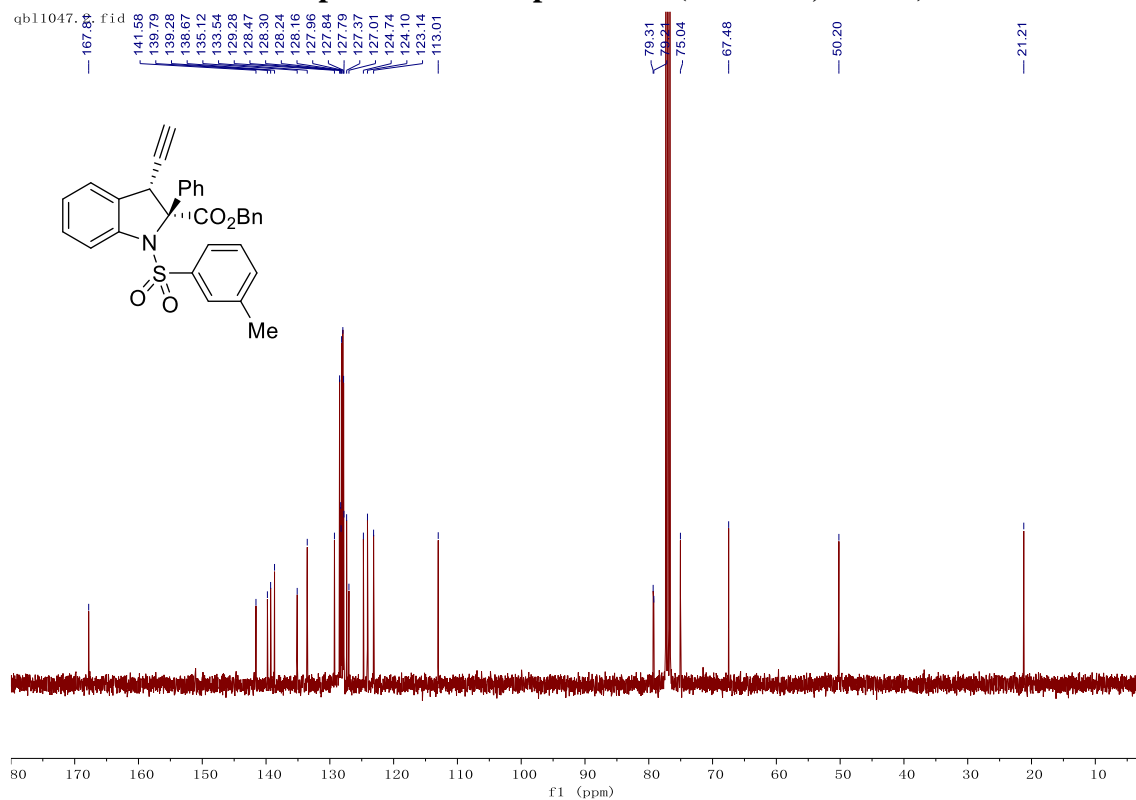

### <sup>1</sup>H NMR spectrum of compound 6 (400 MHz, CDCl<sub>3</sub>)

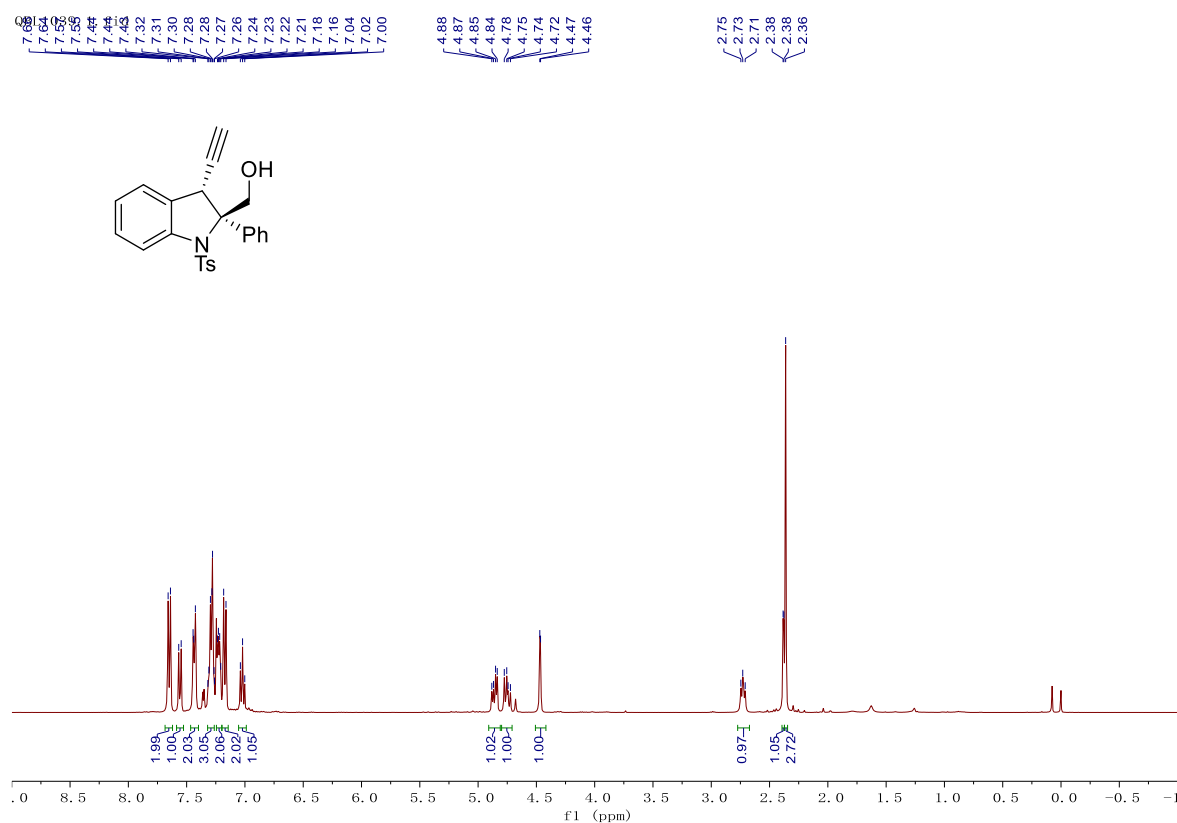

### <sup>13</sup>C NMR spectrum of compound 6 (100 MHz, CDCl<sub>3</sub>)

QBL1039. 2. fid

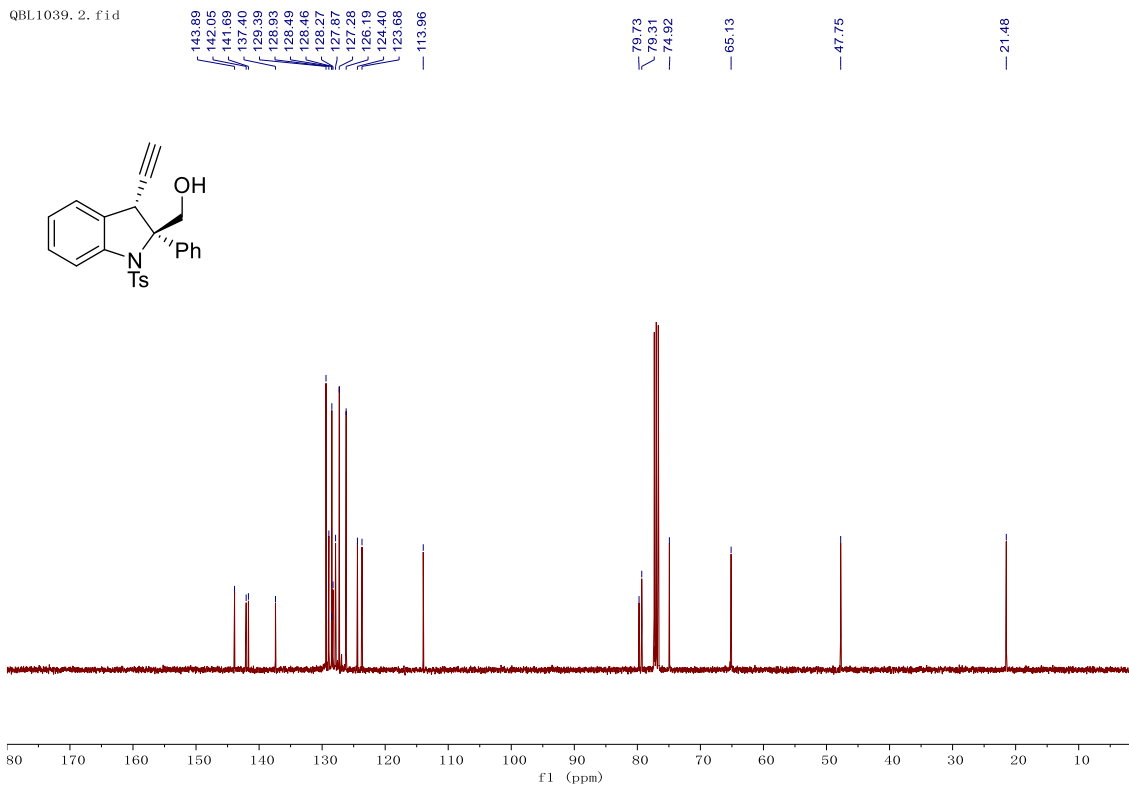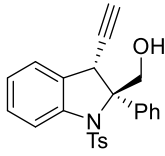

### <sup>1</sup>H NMR spectrum of compound 7 (400 MHz, CDCl<sub>3</sub>)

QBL1403. 1. fid

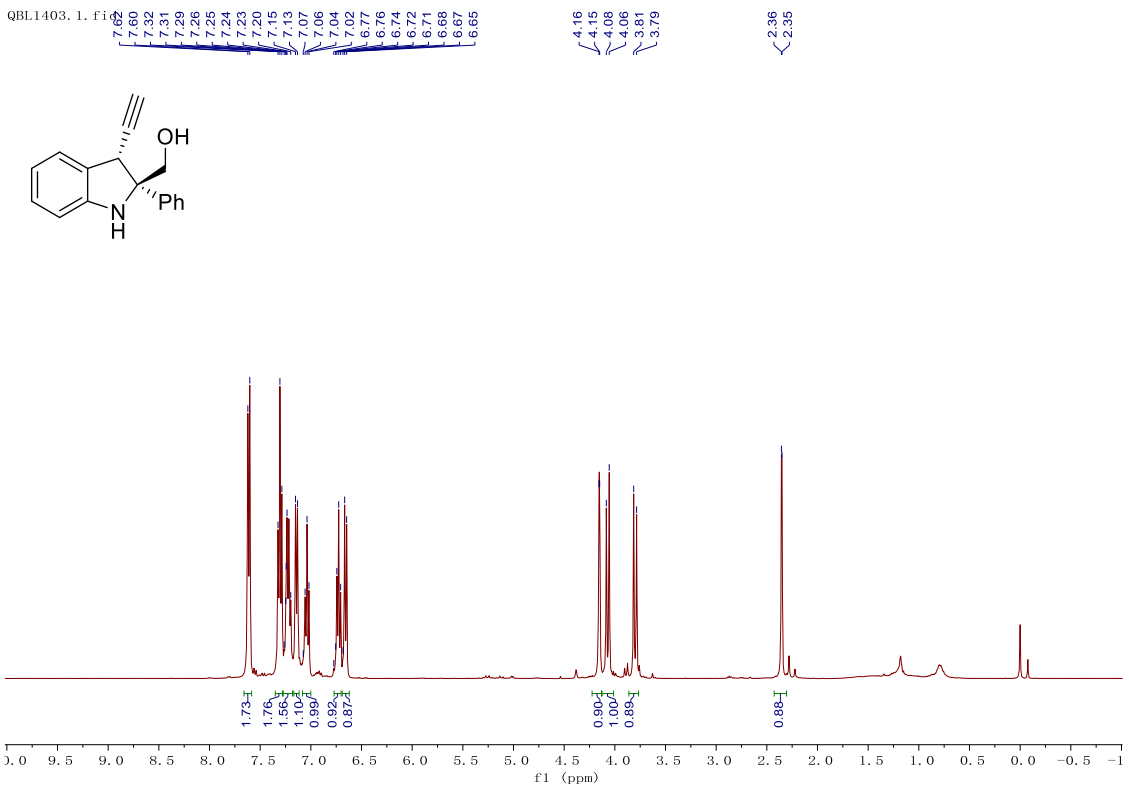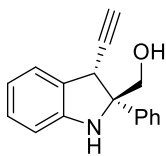

### <sup>13</sup>C NMR spectrum of compound 7 (100 MHz, CDCl<sub>3</sub>)

QBL1403.3.fid

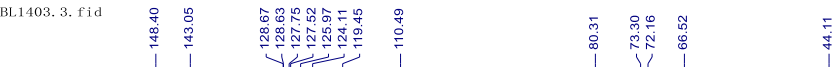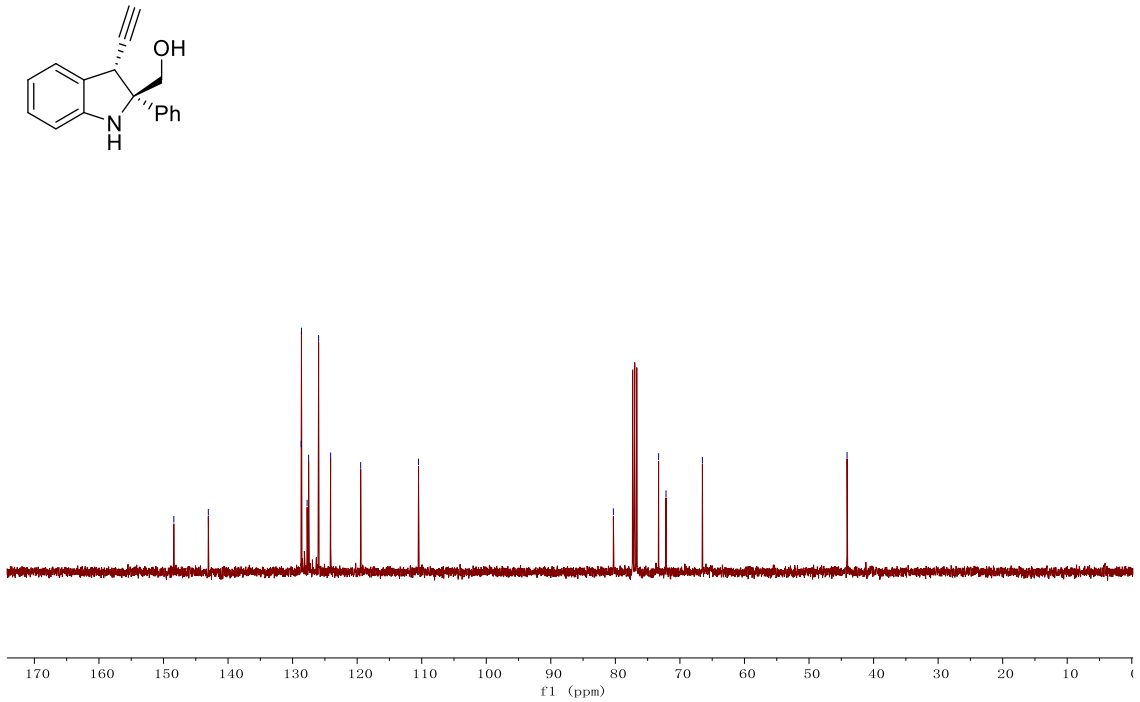

### <sup>1</sup>H NMR spectrum of compound 8 (400 MHz, CDCl<sub>3</sub>)

qb11406

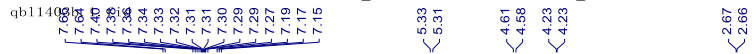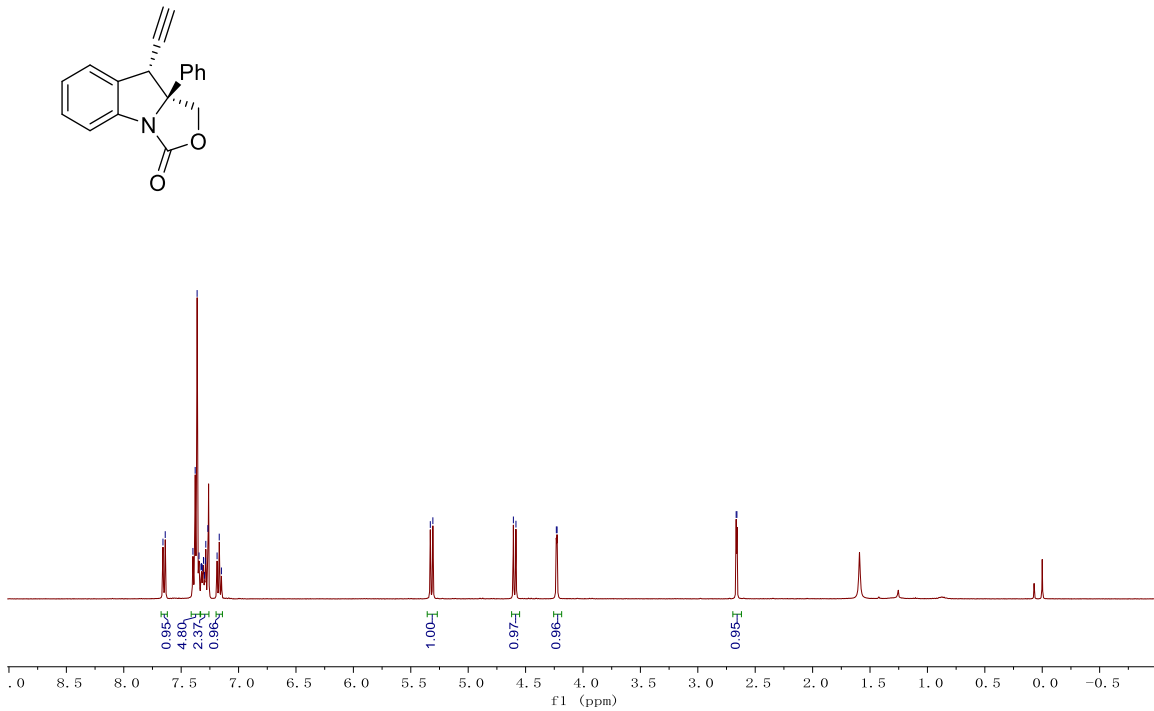



### <sup>13</sup>C NMR spectrum of compound 8 (100 MHz, CDCl<sub>3</sub>)

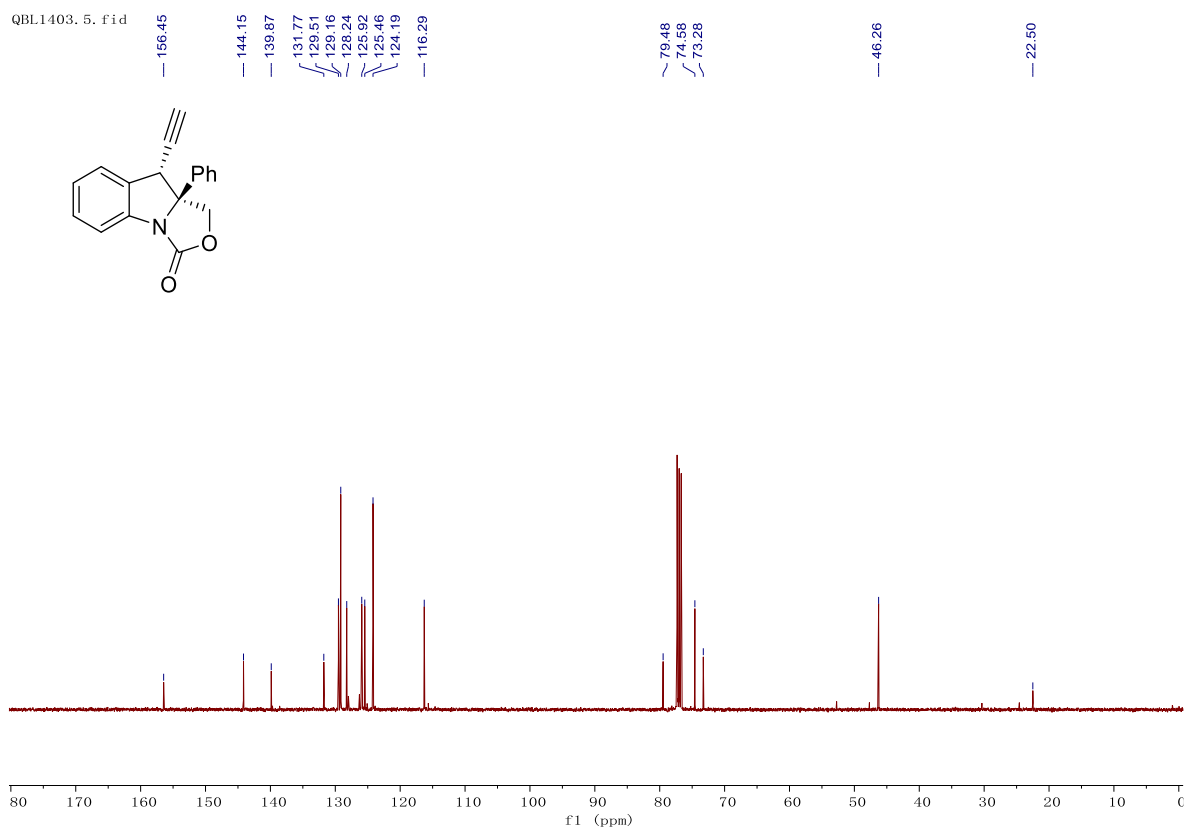

### <sup>1</sup>H NMR spectrum of compound 9 (400 MHz, CDCl<sub>3</sub>)

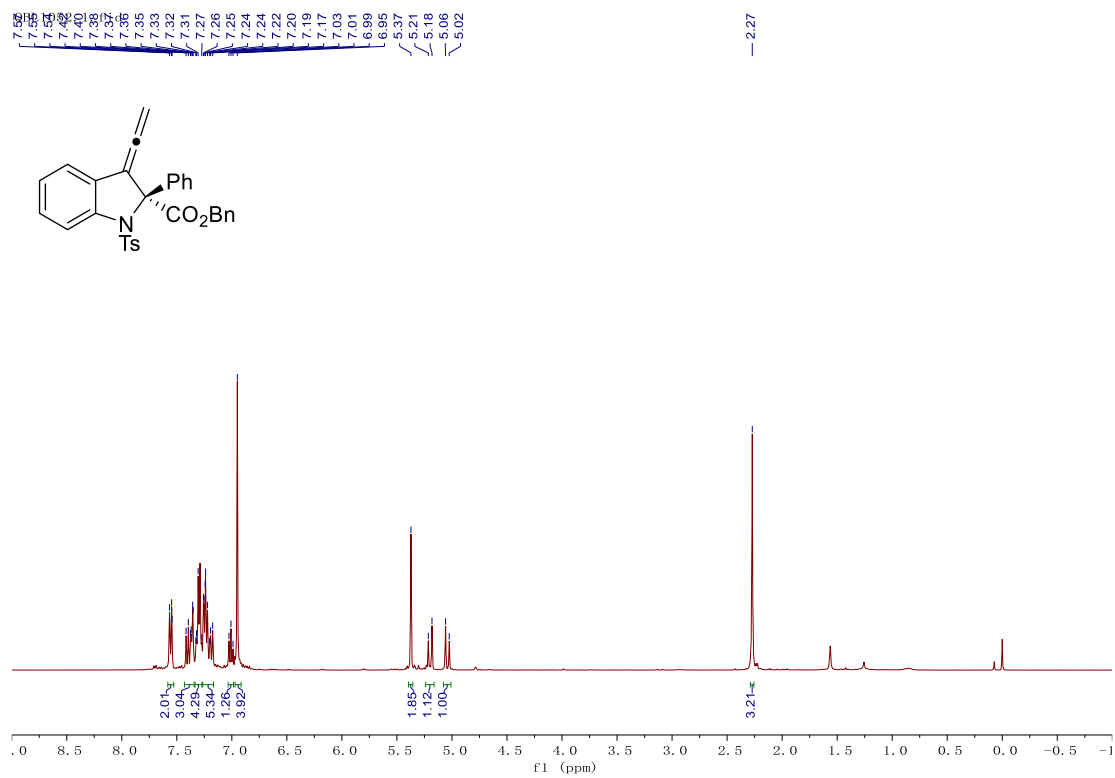

**<sup>13</sup>C NMR spectrum of compound 9 (100 MHz, CDCl<sub>3</sub>)**

QBL1552.2.fid

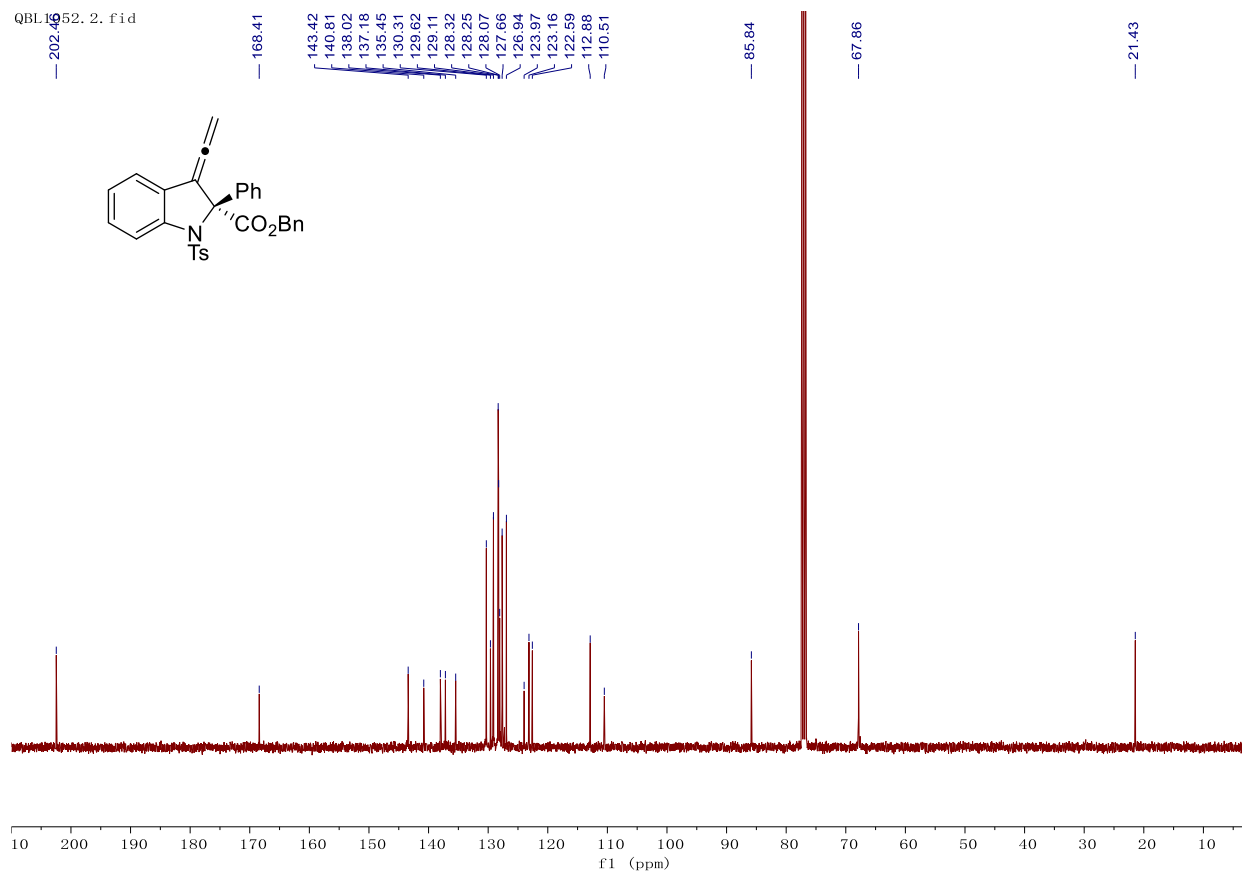

## 6. Copies of HPLC Spectra

| HPLC spectrum of racemic 3a                                                              |                                                                                                                                                                                                                                                                                                                                                                                                                                                                                                                                                                                                                                                                                                                                        |        |               |             |              |             |              |        |   |        |    |        |            |           |         |   |        |    |        |            |            |         |   |        |    |        |            |          |         |   |        |    |        |            |          |         |
|------------------------------------------------------------------------------------------|----------------------------------------------------------------------------------------------------------------------------------------------------------------------------------------------------------------------------------------------------------------------------------------------------------------------------------------------------------------------------------------------------------------------------------------------------------------------------------------------------------------------------------------------------------------------------------------------------------------------------------------------------------------------------------------------------------------------------------------|--------|---------------|-------------|--------------|-------------|--------------|--------|---|--------|----|--------|------------|-----------|---------|---|--------|----|--------|------------|------------|---------|---|--------|----|--------|------------|----------|---------|---|--------|----|--------|------------|----------|---------|
| <p>DAD1 A, Sig=254.4 Ref=off (E:\DATA\ABSI\DEF_LC 2021-04-12 09-12-03\QBL795D0.5.D)</p>  | <p><b>rac-3a</b></p> <table border="1"> <thead> <tr> <th>Peak #</th> <th>RetTime [min]</th> <th>Type</th> <th>Width [min]</th> <th>Area mAU *s</th> <th>Height [mAU]</th> <th>Area %</th> </tr> </thead> <tbody> <tr> <td>1</td> <td>48.263</td> <td>BB</td> <td>0.8538</td> <td>1230.16296</td> <td>20.68695</td> <td>49.7153</td> </tr> <tr> <td>2</td> <td>50.773</td> <td>BB</td> <td>0.8802</td> <td>1244.25159</td> <td>19.71780</td> <td>50.2847</td> </tr> </tbody> </table>                                                                                                                                                                                                                                                   | Peak # | RetTime [min] | Type        | Width [min]  | Area mAU *s | Height [mAU] | Area % | 1 | 48.263 | BB | 0.8538 | 1230.16296 | 20.68695  | 49.7153 | 2 | 50.773 | BB | 0.8802 | 1244.25159 | 19.71780   | 50.2847 |   |        |    |        |            |          |         |   |        |    |        |            |          |         |
| Peak #                                                                                   | RetTime [min]                                                                                                                                                                                                                                                                                                                                                                                                                                                                                                                                                                                                                                                                                                                          | Type   | Width [min]   | Area mAU *s | Height [mAU] | Area %      |              |        |   |        |    |        |            |           |         |   |        |    |        |            |            |         |   |        |    |        |            |          |         |   |        |    |        |            |          |         |
| 1                                                                                        | 48.263                                                                                                                                                                                                                                                                                                                                                                                                                                                                                                                                                                                                                                                                                                                                 | BB     | 0.8538        | 1230.16296  | 20.68695     | 49.7153     |              |        |   |        |    |        |            |           |         |   |        |    |        |            |            |         |   |        |    |        |            |          |         |   |        |    |        |            |          |         |
| 2                                                                                        | 50.773                                                                                                                                                                                                                                                                                                                                                                                                                                                                                                                                                                                                                                                                                                                                 | BB     | 0.8802        | 1244.25159  | 19.71780     | 50.2847     |              |        |   |        |    |        |            |           |         |   |        |    |        |            |            |         |   |        |    |        |            |          |         |   |        |    |        |            |          |         |
| HPLC spectrum of 3a                                                                      |                                                                                                                                                                                                                                                                                                                                                                                                                                                                                                                                                                                                                                                                                                                                        |        |               |             |              |             |              |        |   |        |    |        |            |           |         |   |        |    |        |            |            |         |   |        |    |        |            |          |         |   |        |    |        |            |          |         |
| <p>DAD1 A, Sig=254.4 Ref=off (E:\DATA\ABSI\DEF_LC 2021-04-12 09-12-03\QBL803A0.5Z.D)</p> | <p><b>3a</b></p> <table border="1"> <thead> <tr> <th>Peak #</th> <th>RetTime [min]</th> <th>Type</th> <th>Width [min]</th> <th>Area mAU *s</th> <th>Height [mAU]</th> <th>Area %</th> </tr> </thead> <tbody> <tr> <td>1</td> <td>48.317</td> <td>BB</td> <td>0.9152</td> <td>789.37970</td> <td>13.02188</td> <td>94.9196</td> </tr> <tr> <td>2</td> <td>50.859</td> <td>BB</td> <td>0.7323</td> <td>42.25006</td> <td>7.16163e-1</td> <td>5.0804</td> </tr> </tbody> </table>                                                                                                                                                                                                                                                         | Peak # | RetTime [min] | Type        | Width [min]  | Area mAU *s | Height [mAU] | Area % | 1 | 48.317 | BB | 0.9152 | 789.37970  | 13.02188  | 94.9196 | 2 | 50.859 | BB | 0.7323 | 42.25006   | 7.16163e-1 | 5.0804  |   |        |    |        |            |          |         |   |        |    |        |            |          |         |
| Peak #                                                                                   | RetTime [min]                                                                                                                                                                                                                                                                                                                                                                                                                                                                                                                                                                                                                                                                                                                          | Type   | Width [min]   | Area mAU *s | Height [mAU] | Area %      |              |        |   |        |    |        |            |           |         |   |        |    |        |            |            |         |   |        |    |        |            |          |         |   |        |    |        |            |          |         |
| 1                                                                                        | 48.317                                                                                                                                                                                                                                                                                                                                                                                                                                                                                                                                                                                                                                                                                                                                 | BB     | 0.9152        | 789.37970   | 13.02188     | 94.9196     |              |        |   |        |    |        |            |           |         |   |        |    |        |            |            |         |   |        |    |        |            |          |         |   |        |    |        |            |          |         |
| 2                                                                                        | 50.859                                                                                                                                                                                                                                                                                                                                                                                                                                                                                                                                                                                                                                                                                                                                 | BB     | 0.7323        | 42.25006    | 7.16163e-1   | 5.0804      |              |        |   |        |    |        |            |           |         |   |        |    |        |            |            |         |   |        |    |        |            |          |         |   |        |    |        |            |          |         |
| HPLC spectrum of racemic 3b                                                              |                                                                                                                                                                                                                                                                                                                                                                                                                                                                                                                                                                                                                                                                                                                                        |        |               |             |              |             |              |        |   |        |    |        |            |           |         |   |        |    |        |            |            |         |   |        |    |        |            |          |         |   |        |    |        |            |          |         |
| <p>DAD1 B, Sig=254.4 Ref=off (E:\DATA\QBL\DEF_LC 2021-07-28 10-27-58\QBL893B.D)</p>      | <p><b>rac-3b</b></p> <table border="1"> <thead> <tr> <th>Peak #</th> <th>RetTime [min]</th> <th>Type</th> <th>Width [min]</th> <th>Area mAU *s</th> <th>Height [mAU]</th> <th>Area %</th> </tr> </thead> <tbody> <tr> <td>1</td> <td>24.200</td> <td>BB</td> <td>0.5881</td> <td>1172.66956</td> <td>29.73348</td> <td>50.6311</td> </tr> <tr> <td>2</td> <td>45.828</td> <td>BB</td> <td>0.9191</td> <td>1143.43713</td> <td>14.73920</td> <td>49.3689</td> </tr> </tbody> </table>                                                                                                                                                                                                                                                   | Peak # | RetTime [min] | Type        | Width [min]  | Area mAU *s | Height [mAU] | Area % | 1 | 24.200 | BB | 0.5881 | 1172.66956 | 29.73348  | 50.6311 | 2 | 45.828 | BB | 0.9191 | 1143.43713 | 14.73920   | 49.3689 |   |        |    |        |            |          |         |   |        |    |        |            |          |         |
| Peak #                                                                                   | RetTime [min]                                                                                                                                                                                                                                                                                                                                                                                                                                                                                                                                                                                                                                                                                                                          | Type   | Width [min]   | Area mAU *s | Height [mAU] | Area %      |              |        |   |        |    |        |            |           |         |   |        |    |        |            |            |         |   |        |    |        |            |          |         |   |        |    |        |            |          |         |
| 1                                                                                        | 24.200                                                                                                                                                                                                                                                                                                                                                                                                                                                                                                                                                                                                                                                                                                                                 | BB     | 0.5881        | 1172.66956  | 29.73348     | 50.6311     |              |        |   |        |    |        |            |           |         |   |        |    |        |            |            |         |   |        |    |        |            |          |         |   |        |    |        |            |          |         |
| 2                                                                                        | 45.828                                                                                                                                                                                                                                                                                                                                                                                                                                                                                                                                                                                                                                                                                                                                 | BB     | 0.9191        | 1143.43713  | 14.73920     | 49.3689     |              |        |   |        |    |        |            |           |         |   |        |    |        |            |            |         |   |        |    |        |            |          |         |   |        |    |        |            |          |         |
| HPLC spectrum of 3b                                                                      |                                                                                                                                                                                                                                                                                                                                                                                                                                                                                                                                                                                                                                                                                                                                        |        |               |             |              |             |              |        |   |        |    |        |            |           |         |   |        |    |        |            |            |         |   |        |    |        |            |          |         |   |        |    |        |            |          |         |
| <p>DAD1 B, Sig=254.4 Ref=off (E:\DATA\QBL\DEF_LC 2021-08-01 15-29-09\QBL951A.D)</p>      | <p><b>3b</b></p> <table border="1"> <thead> <tr> <th>Peak #</th> <th>RetTime [min]</th> <th>Type</th> <th>Width [min]</th> <th>Area mAU *s</th> <th>Height [mAU]</th> <th>Area %</th> </tr> </thead> <tbody> <tr> <td>1</td> <td>23.400</td> <td>BB</td> <td>0.5859</td> <td>4810.12988</td> <td>126.41457</td> <td>91.5915</td> </tr> <tr> <td>2</td> <td>44.097</td> <td>BB</td> <td>0.8312</td> <td>441.59152</td> <td>6.25859</td> <td>8.4085</td> </tr> </tbody> </table>                                                                                                                                                                                                                                                         | Peak # | RetTime [min] | Type        | Width [min]  | Area mAU *s | Height [mAU] | Area % | 1 | 23.400 | BB | 0.5859 | 4810.12988 | 126.41457 | 91.5915 | 2 | 44.097 | BB | 0.8312 | 441.59152  | 6.25859    | 8.4085  |   |        |    |        |            |          |         |   |        |    |        |            |          |         |
| Peak #                                                                                   | RetTime [min]                                                                                                                                                                                                                                                                                                                                                                                                                                                                                                                                                                                                                                                                                                                          | Type   | Width [min]   | Area mAU *s | Height [mAU] | Area %      |              |        |   |        |    |        |            |           |         |   |        |    |        |            |            |         |   |        |    |        |            |          |         |   |        |    |        |            |          |         |
| 1                                                                                        | 23.400                                                                                                                                                                                                                                                                                                                                                                                                                                                                                                                                                                                                                                                                                                                                 | BB     | 0.5859        | 4810.12988  | 126.41457    | 91.5915     |              |        |   |        |    |        |            |           |         |   |        |    |        |            |            |         |   |        |    |        |            |          |         |   |        |    |        |            |          |         |
| 2                                                                                        | 44.097                                                                                                                                                                                                                                                                                                                                                                                                                                                                                                                                                                                                                                                                                                                                 | BB     | 0.8312        | 441.59152   | 6.25859      | 8.4085      |              |        |   |        |    |        |            |           |         |   |        |    |        |            |            |         |   |        |    |        |            |          |         |   |        |    |        |            |          |         |
| HPLC spectrum of racemic 3c                                                              |                                                                                                                                                                                                                                                                                                                                                                                                                                                                                                                                                                                                                                                                                                                                        |        |               |             |              |             |              |        |   |        |    |        |            |           |         |   |        |    |        |            |            |         |   |        |    |        |            |          |         |   |        |    |        |            |          |         |
| <p>DAD1 B, Sig=254.4 Ref=off (E:\DATA\QBL\DEF_LC 2021-07-31 08-44-37\QBL901B.D)</p>      | <p><b>rac-3c</b></p> <table border="1"> <thead> <tr> <th>Peak #</th> <th>RetTime [min]</th> <th>Type</th> <th>Width [min]</th> <th>Area mAU *s</th> <th>Height [mAU]</th> <th>Area %</th> </tr> </thead> <tbody> <tr> <td>1</td> <td>14.265</td> <td>BB</td> <td>0.3428</td> <td>1520.18762</td> <td>68.00169</td> <td>17.5412</td> </tr> <tr> <td>2</td> <td>18.542</td> <td>BB</td> <td>0.4588</td> <td>2805.01660</td> <td>97.16734</td> <td>32.3666</td> </tr> <tr> <td>3</td> <td>20.156</td> <td>BB</td> <td>0.4956</td> <td>1501.18030</td> <td>46.62340</td> <td>17.3218</td> </tr> <tr> <td>4</td> <td>23.523</td> <td>BB</td> <td>0.5828</td> <td>2840.01978</td> <td>75.17506</td> <td>32.7705</td> </tr> </tbody> </table> | Peak # | RetTime [min] | Type        | Width [min]  | Area mAU *s | Height [mAU] | Area % | 1 | 14.265 | BB | 0.3428 | 1520.18762 | 68.00169  | 17.5412 | 2 | 18.542 | BB | 0.4588 | 2805.01660 | 97.16734   | 32.3666 | 3 | 20.156 | BB | 0.4956 | 1501.18030 | 46.62340 | 17.3218 | 4 | 23.523 | BB | 0.5828 | 2840.01978 | 75.17506 | 32.7705 |
| Peak #                                                                                   | RetTime [min]                                                                                                                                                                                                                                                                                                                                                                                                                                                                                                                                                                                                                                                                                                                          | Type   | Width [min]   | Area mAU *s | Height [mAU] | Area %      |              |        |   |        |    |        |            |           |         |   |        |    |        |            |            |         |   |        |    |        |            |          |         |   |        |    |        |            |          |         |
| 1                                                                                        | 14.265                                                                                                                                                                                                                                                                                                                                                                                                                                                                                                                                                                                                                                                                                                                                 | BB     | 0.3428        | 1520.18762  | 68.00169     | 17.5412     |              |        |   |        |    |        |            |           |         |   |        |    |        |            |            |         |   |        |    |        |            |          |         |   |        |    |        |            |          |         |
| 2                                                                                        | 18.542                                                                                                                                                                                                                                                                                                                                                                                                                                                                                                                                                                                                                                                                                                                                 | BB     | 0.4588        | 2805.01660  | 97.16734     | 32.3666     |              |        |   |        |    |        |            |           |         |   |        |    |        |            |            |         |   |        |    |        |            |          |         |   |        |    |        |            |          |         |
| 3                                                                                        | 20.156                                                                                                                                                                                                                                                                                                                                                                                                                                                                                                                                                                                                                                                                                                                                 | BB     | 0.4956        | 1501.18030  | 46.62340     | 17.3218     |              |        |   |        |    |        |            |           |         |   |        |    |        |            |            |         |   |        |    |        |            |          |         |   |        |    |        |            |          |         |
| 4                                                                                        | 23.523                                                                                                                                                                                                                                                                                                                                                                                                                                                                                                                                                                                                                                                                                                                                 | BB     | 0.5828        | 2840.01978  | 75.17506     | 32.7705     |              |        |   |        |    |        |            |           |         |   |        |    |        |            |            |         |   |        |    |        |            |          |         |   |        |    |        |            |          |         |
| HPLC spectrum of 3c                                                                      |                                                                                                                                                                                                                                                                                                                                                                                                                                                                                                                                                                                                                                                                                                                                        |        |               |             |              |             |              |        |   |        |    |        |            |           |         |   |        |    |        |            |            |         |   |        |    |        |            |          |         |   |        |    |        |            |          |         |
| <p>DAD1 B, Sig=254.4 Ref=off (E:\DATA\QBL\DEF_LC 2021-08-16 14-10-50\qbl958b.D)</p>      | <p><b>3c</b></p> <table border="1"> <thead> <tr> <th>Peak #</th> <th>RetTime [min]</th> <th>Type</th> <th>Width [min]</th> <th>Area mAU *s</th> <th>Height [mAU]</th> <th>Area %</th> </tr> </thead> <tbody> <tr> <td>1</td> <td>19.190</td> <td>BB</td> <td>0.4692</td> <td>6001.36572</td> <td>197.09412</td> <td>94.4744</td> </tr> <tr> <td>2</td> <td>24.347</td> <td>BB</td> <td>0.4675</td> <td>351.00403</td> <td>9.23379</td> <td>5.5256</td> </tr> </tbody> </table>                                                                                                                                                                                                                                                         | Peak # | RetTime [min] | Type        | Width [min]  | Area mAU *s | Height [mAU] | Area % | 1 | 19.190 | BB | 0.4692 | 6001.36572 | 197.09412 | 94.4744 | 2 | 24.347 | BB | 0.4675 | 351.00403  | 9.23379    | 5.5256  |   |        |    |        |            |          |         |   |        |    |        |            |          |         |
| Peak #                                                                                   | RetTime [min]                                                                                                                                                                                                                                                                                                                                                                                                                                                                                                                                                                                                                                                                                                                          | Type   | Width [min]   | Area mAU *s | Height [mAU] | Area %      |              |        |   |        |    |        |            |           |         |   |        |    |        |            |            |         |   |        |    |        |            |          |         |   |        |    |        |            |          |         |
| 1                                                                                        | 19.190                                                                                                                                                                                                                                                                                                                                                                                                                                                                                                                                                                                                                                                                                                                                 | BB     | 0.4692        | 6001.36572  | 197.09412    | 94.4744     |              |        |   |        |    |        |            |           |         |   |        |    |        |            |            |         |   |        |    |        |            |          |         |   |        |    |        |            |          |         |
| 2                                                                                        | 24.347                                                                                                                                                                                                                                                                                                                                                                                                                                                                                                                                                                                                                                                                                                                                 | BB     | 0.4675        | 351.00403   | 9.23379      | 5.5256      |              |        |   |        |    |        |            |           |         |   |        |    |        |            |            |         |   |        |    |        |            |          |         |   |        |    |        |            |          |         |

### HPLC spectrum of racemic 3d

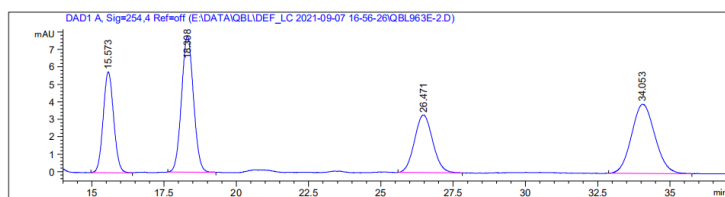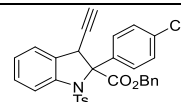

**rac-3d**

| Peak # | RetTime [min] | Type | Width [min] | Area mAU  | *s | Height [mAU] | Area %  |
|--------|---------------|------|-------------|-----------|----|--------------|---------|
| 1      | 15.573        | BB   | 0.3867      | 144.65961 |    | 5.76501      | 19.6349 |
| 2      | 18.308        | BB   | 0.4459      | 224.48845 |    | 7.79617      | 30.4701 |
| 3      | 26.471        | BB   | 0.5888      | 144.75035 |    | 3.30618      | 19.6472 |
| 4      | 34.053        | BB   | 0.6989      | 222.85080 |    | 3.95803      | 30.2479 |

### HPLC spectrum of 3d

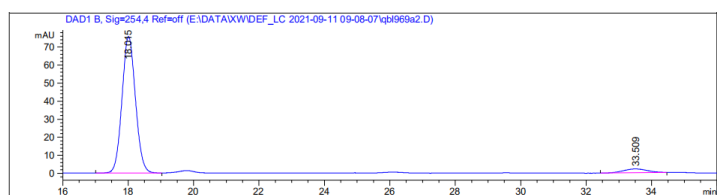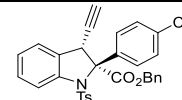

**3d**

| Peak # | RetTime [min] | Type | Width [min] | Area mAU   | *s | Height [mAU] | Area %  |
|--------|---------------|------|-------------|------------|----|--------------|---------|
| 1      | 18.015        | BV   | 0.4434      | 2159.11987 |    | 75.54601     | 95.3480 |
| 2      | 33.509        | BB   | 0.6772      | 105.34396  |    | 2.10015      | 4.6520  |

### HPLC spectrum of racemic 3e

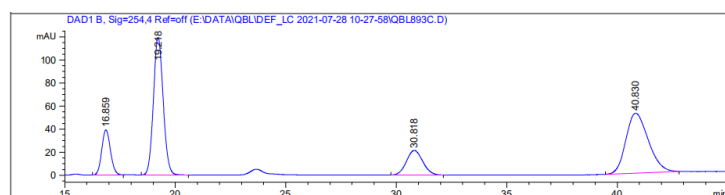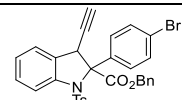

**rac-3e**

| Peak # | RetTime [min] | Type | Width [min] | Area mAU   | *s | Height [mAU] | Area %  |
|--------|---------------|------|-------------|------------|----|--------------|---------|
| 1      | 16.859        | BB   | 0.4173      | 1070.11279 |    | 39.09487     | 11.2702 |
| 2      | 19.218        | BB   | 0.4767      | 3668.60303 |    | 119.33127    | 38.6370 |
| 3      | 30.818        | BB   | 0.6357      | 1096.15271 |    | 21.32385     | 11.5445 |
| 4      | 40.830        | BB   | 0.9640      | 3660.17871 |    | 51.94664     | 38.5483 |

### HPLC spectrum of 3e

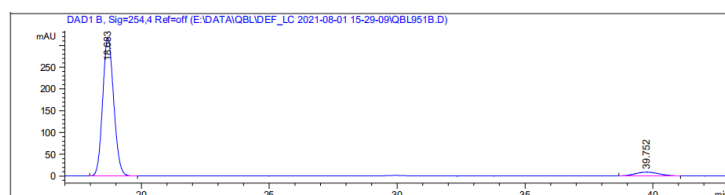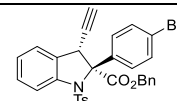

**3e**

| Peak # | RetTime [min] | Type | Width [min] | Area mAU   | *s | Height [mAU] | Area %  |
|--------|---------------|------|-------------|------------|----|--------------|---------|
| 1      | 18.683        | BB   | 0.4639      | 9476.20313 |    | 317.79935    | 94.5164 |
| 2      | 39.752        | BB   | 0.7484      | 549.79016  |    | 8.70979      | 5.4836  |

### HPLC spectrum of racemic 3f

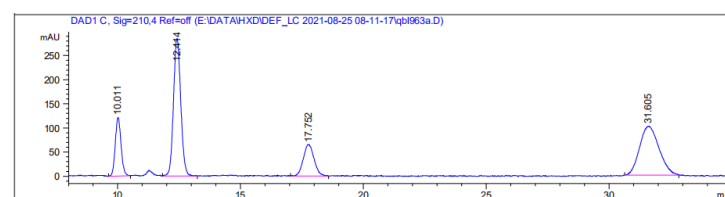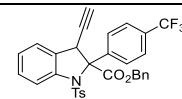

**rac-3f**

| Peak # | RetTime [min] | Type | Width [min] | Area mAU   | *s | Height [mAU] | Area %  |
|--------|---------------|------|-------------|------------|----|--------------|---------|
| 1      | 10.011        | BV R | 0.2390      | 1986.57324 |    | 121.33531    | 12.9173 |
| 2      | 12.414        | VV R | 0.3137      | 5856.90039 |    | 284.72473    | 38.0834 |
| 3      | 17.752        | VV R | 0.3815      | 1974.17603 |    | 65.15001     | 12.8367 |
| 4      | 31.605        | VV R | 0.6459      | 5561.49414 |    | 101.39738    | 36.1626 |

### HPLC spectrum of 3f

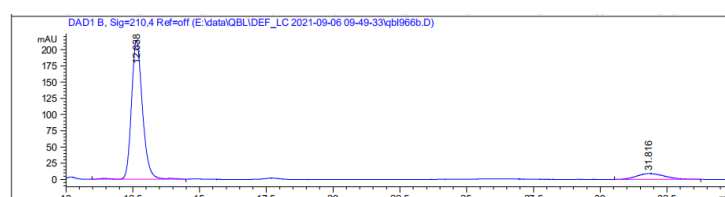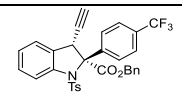

**3f**

| Peak # | RetTime [min] | Type | Width [min] | Area mAU   | *s | Height [mAU] | Area %  |
|--------|---------------|------|-------------|------------|----|--------------|---------|
| 1      | 12.638        | VV R | 0.4340      | 6125.74414 |    | 214.01921    | 90.1235 |
| 2      | 31.816        | BB   | 0.8732      | 671.31421  |    | 9.09411      | 9.8765  |

### HPLC spectrum of racemic 3g

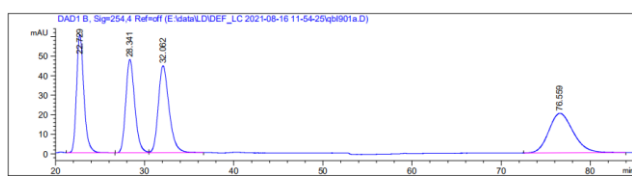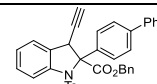

**rac-3g**

| Peak # | RetTime [min] | Type | Width [min] | Area mAU   | *s | Height [mAU] | Area %  |
|--------|---------------|------|-------------|------------|----|--------------|---------|
| 1      | 22.729        | BB   | 0.8803      | 3470.05444 |    | 60.58092     | 24.0558 |
| 2      | 28.341        | BV   | 1.0919      | 3358.05103 |    | 47.78162     | 23.2794 |
| 3      | 32.062        | VB   | 1.2896      | 3760.28833 |    | 44.51208     | 26.0678 |
| 4      | 76.559        | BB   | 2.4673      | 3836.61475 |    | 20.20539     | 26.5970 |

### HPLC spectrum of 3g

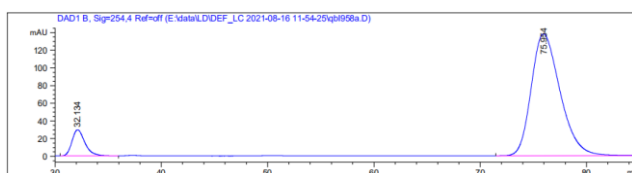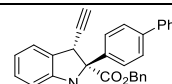

**3g**

| Peak # | RetTime [min] | Type | Width [min] | Area mAU   | *s | Height [mAU] | Area %  |
|--------|---------------|------|-------------|------------|----|--------------|---------|
| 1      | 32.134        | VB   | 1.2870      | 2492.78467 |    | 29.58451     | 8.7729  |
| 2      | 75.954        | BBA  | 2.8678      | 2.59217e4  |    | 137.72528    | 91.2271 |

### HPLC spectrum of racemic 3l

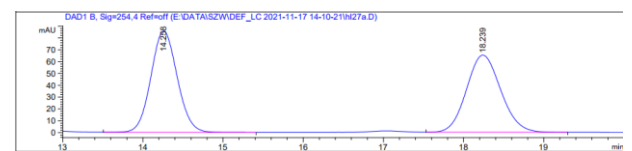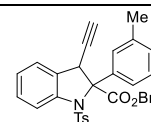

**rac-3l**

| Peak # | RetTime [min] | Type | Width [min] | Area mAU   | *s | Height [mAU] | Area %  |
|--------|---------------|------|-------------|------------|----|--------------|---------|
| 1      | 14.258        | BB   | 0.3557      | 1950.95837 |    | 85.66096     | 50.1834 |
| 2      | 18.239        | BB   | 0.4648      | 1936.69897 |    | 65.15800     | 49.8166 |

### HPLC spectrum of 3l

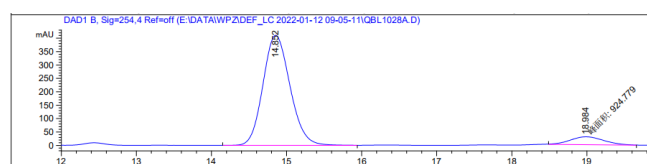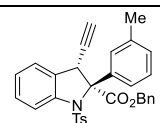

**3l**

| Peak # | RetTime [min] | Type | Width [min] | Area mAU  | *s | Height [mAU] | Area %  |
|--------|---------------|------|-------------|-----------|----|--------------|---------|
| 1      | 14.852        | BB   | 0.3889      | 1.02269e4 |    | 410.20135    | 91.7072 |
| 2      | 18.984        | MM   | 0.5215      | 924.77881 |    | 29.55631     | 8.2928  |

### HPLC spectrum of racemic 3i

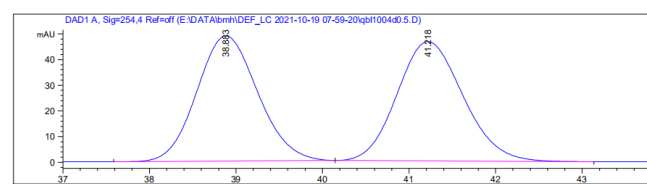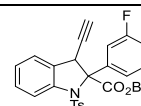

**rac-3i**

| Peak # | RetTime [min] | Type | Width [min] | Area mAU   | *s | Height [mAU] | Area %  |
|--------|---------------|------|-------------|------------|----|--------------|---------|
| 1      | 38.883        | BB   | 0.7574      | 2388.17090 |    | 48.76152     | 49.2134 |
| 2      | 41.218        | BB   | 0.8210      | 2464.51660 |    | 46.45378     | 50.7866 |

### HPLC spectrum of 3i

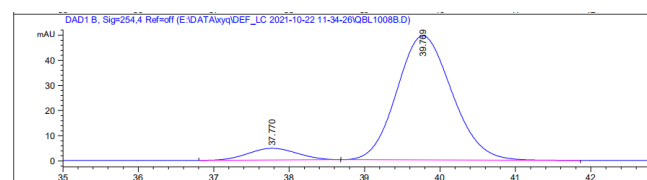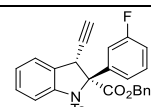

**3i**

| Peak # | RetTime [min] | Type | Width [min] | Area mAU   | *s | Height [mAU] | Area %  |
|--------|---------------|------|-------------|------------|----|--------------|---------|
| 1      | 37.770        | BB   | 0.6045      | 212.53212  |    | 4.67388      | 7.8199  |
| 2      | 39.769        | BB   | 0.7784      | 2505.31055 |    | 49.33963     | 92.1801 |

### HPLC spectrum of racemic 3j

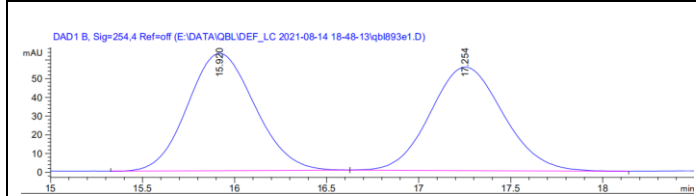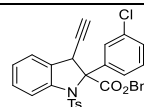

**rac-3j**

| Peak # | RetTime [min] | Type | Width [min] | Area mAU   | Area *s | Height [mAU] | Area %  |
|--------|---------------|------|-------------|------------|---------|--------------|---------|
| 1      | 15.920        | BB   | 0.3887      | 1593.95044 |         | 62.67661     | 51.0591 |
| 2      | 17.254        | BB   | 0.4262      | 1527.82214 |         | 55.32069     | 48.9409 |

### HPLC spectrum of 3j

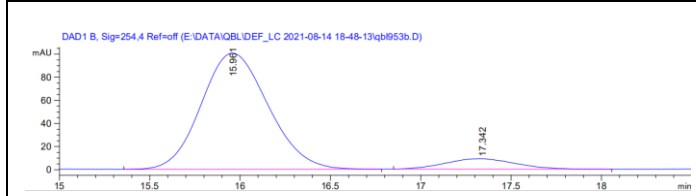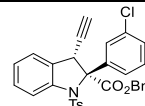

**3j**

| Peak # | RetTime [min] | Type | Width [min] | Area mAU   | Area *s | Height [mAU] | Area %  |
|--------|---------------|------|-------------|------------|---------|--------------|---------|
| 1      | 15.961        | BB   | 0.4010      | 2592.86133 |         | 100.49010    | 91.4422 |
| 2      | 17.342        | BB   | 0.3387      | 242.65880  |         | 8.99517      | 8.5578  |

### HPLC spectrum of racemic 3k

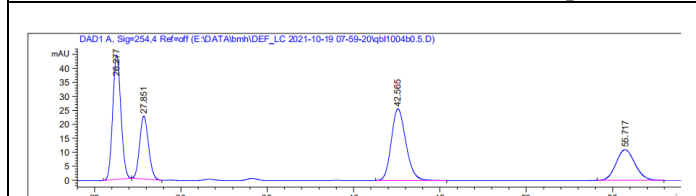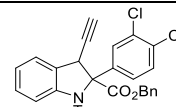

**rac-3k**

| Peak # | RetTime [min] | Type | Width [min] | Area mAU   | Area *s | Height [mAU] | Area %  |
|--------|---------------|------|-------------|------------|---------|--------------|---------|
| 1      | 26.277        | BB   | 0.5107      | 1466.99023 |         | 44.48631     | 31.8503 |
| 2      | 27.851        | BB   | 0.5444      | 799.54608  |         | 22.51241     | 17.3592 |
| 3      | 42.565        | BB   | 0.8847      | 1504.15833 |         | 25.62928     | 32.6573 |
| 4      | 55.717        | BB   | 0.9636      | 835.19720  |         | 11.00307     | 18.1332 |

### HPLC spectrum of 3k

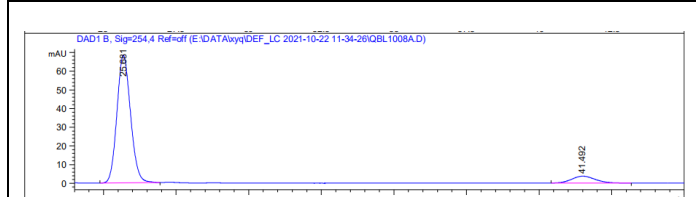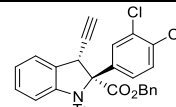

**3k**

| Peak # | RetTime [min] | Type | Width [min] | Area mAU   | Area *s | Height [mAU] | Area %  |
|--------|---------------|------|-------------|------------|---------|--------------|---------|
| 1      | 25.681        | BB   | 0.5043      | 2223.32471 |         | 68.20927     | 91.4676 |
| 2      | 41.492        | BB   | 0.6697      | 207.39995  |         | 3.69016      | 8.5324  |

### HPLC spectrum of racemic 3l

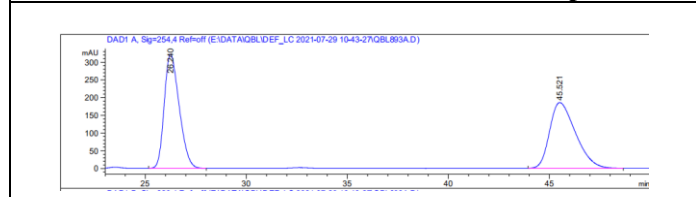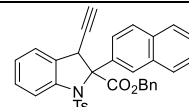

**rac-3l**

| Peak # | RetTime [min] | Type | Width [min] | Area mAU  | Area *s | Height [mAU] | Area %  |
|--------|---------------|------|-------------|-----------|---------|--------------|---------|
| 1      | 26.240        | BB   | 0.7980      | 1.65535e4 |         | 321.89844    | 50.1104 |
| 2      | 45.521        | BB   | 1.2914      | 1.64805e4 |         | 185.33432    | 49.8896 |

### HPLC spectrum of 3l

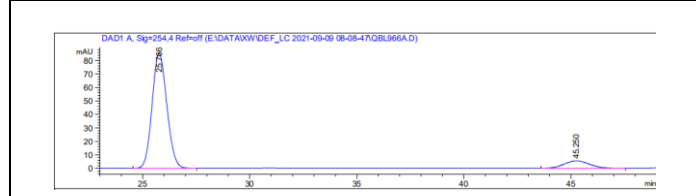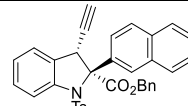

**3l**

| Peak # | RetTime [min] | Type | Width [min] | Area mAU   | Area *s | Height [mAU] | Area %  |
|--------|---------------|------|-------------|------------|---------|--------------|---------|
| 1      | 25.766        | BB   | 0.7468      | 4082.99438 |         | 85.55220     | 89.9145 |
| 2      | 45.250        | BB   | 0.9884      | 457.97958  |         | 5.50593      | 10.0855 |

### HPLC spectrum of racemic 3m

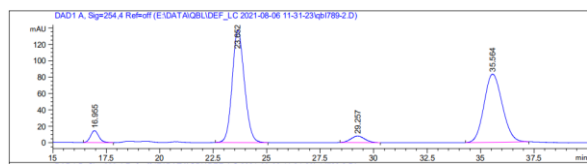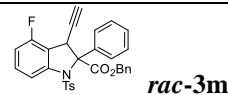

| Peak # | RetTime [min] | Type | Width [min] | Area mAU *s | Height [mAU] | Area %  |
|--------|---------------|------|-------------|-------------|--------------|---------|
| 1      | 16.955        | BB   | 0.3956      | 382.09906   | 14.40061     | 3.4431  |
| 2      | 23.652        | BB   | 0.6153      | 5431.51611  | 136.76633    | 48.9438 |
| 3      | 29.257        | BB   | 0.5465      | 357.81537   | 7.83938      | 3.2243  |
| 4      | 35.564        | BB   | 0.8514      | 4926.01904  | 83.12062     | 44.3887 |

### HPLC spectrum of 3m

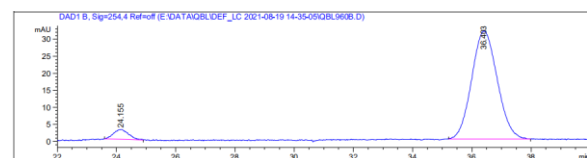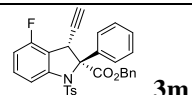

| Peak # | RetTime [min] | Type | Width [min] | Area mAU *s | Height [mAU] | Area %  |
|--------|---------------|------|-------------|-------------|--------------|---------|
| 1      | 24.155        | BB   | 0.4261      | 102.19530   | 2.86545      | 5.1080  |
| 2      | 36.403        | BB   | 0.7123      | 1898.49890  | 31.62892     | 94.8920 |

### HPLC spectrum of racemic 3n

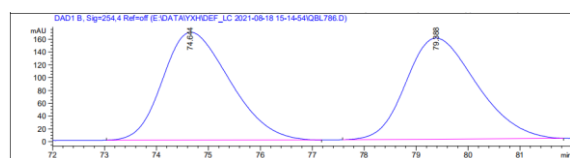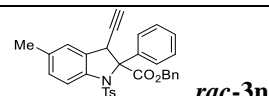

| Peak # | RetTime [min] | Type | Width [min] | Area mAU *s | Height [mAU] | Area %  |
|--------|---------------|------|-------------|-------------|--------------|---------|
| 1      | 74.644        | BB   | 1.0628      | 1.50982e4   | 168.27826    | 50.3553 |
| 2      | 79.388        | BB   | 1.1313      | 1.48851e4   | 157.68823    | 49.6447 |

### HPLC spectrum of 3n

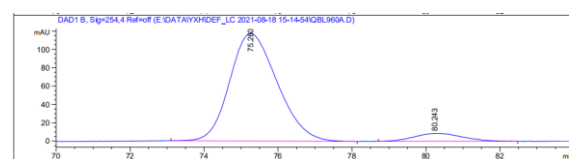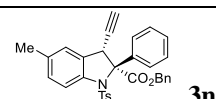

| Peak # | RetTime [min] | Type | Width [min] | Area mAU *s | Height [mAU] | Area %  |
|--------|---------------|------|-------------|-------------|--------------|---------|
| 1      | 75.260        | BB   | 1.2268      | 1.04714e4   | 116.92561    | 92.9332 |
| 2      | 80.243        | BB   | 1.0707      | 796.26788   | 8.77491      | 7.0668  |

### HPLC spectrum of racemic 3o

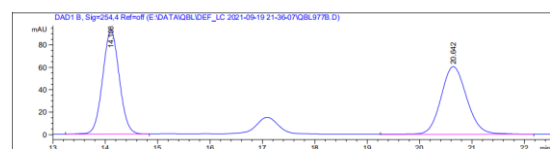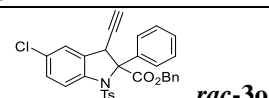

| Peak # | RetTime [min] | Type | Width [min] | Area mAU *s | Height [mAU] | Area %  |
|--------|---------------|------|-------------|-------------|--------------|---------|
| 1      | 14.108        | BB   | 0.3425      | 2042.79443  | 92.21248     | 49.8163 |
| 2      | 20.642        | BB   | 0.5292      | 2057.85645  | 60.44816     | 50.1837 |

### HPLC spectrum of 3o

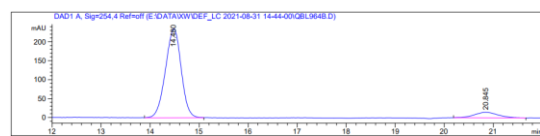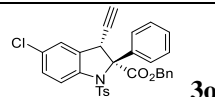

| Peak # | RetTime [min] | Type | Width [min] | Area mAU *s | Height [mAU] | Area %  |
|--------|---------------|------|-------------|-------------|--------------|---------|
| 1      | 14.480        | BB   | 0.3454      | 5216.94629  | 234.64496    | 91.6161 |
| 2      | 20.845        | BB   | 0.4056      | 477.40897   | 14.51964     | 8.3839  |

### HPLC spectrum of racemic 3p

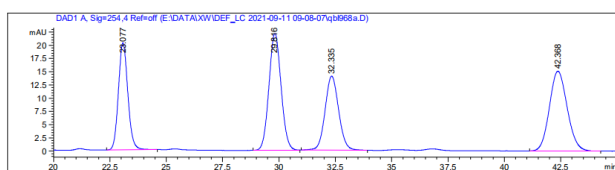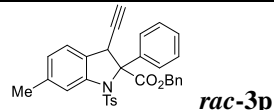

| Peak # | RetTime [min] | Type | Width [min] | Area mAU *s | Height [mAU] | Area %  |
|--------|---------------|------|-------------|-------------|--------------|---------|
| 1      | 23.077        | BB   | 0.4461      | 586.91199   | 20.25302     | 20.7972 |
| 2      | 29.816        | BB   | 0.5778      | 824.33246   | 22.06944     | 29.2102 |
| 3      | 32.335        | BB   | 0.6297      | 585.24792   | 14.00049     | 20.7383 |
| 4      | 42.368        | BB   | 0.8219      | 825.57355   | 15.09859     | 29.2542 |

### HPLC spectrum of 3p

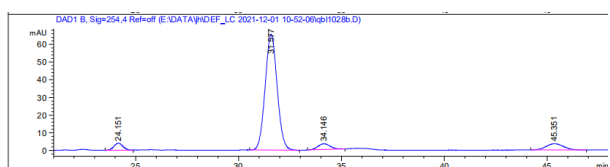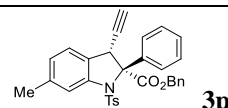

| Peak # | RetTime [min] | Type | Width [min] | Area mAU *s | Height [mAU] | Area %  |
|--------|---------------|------|-------------|-------------|--------------|---------|
| 1      | 24.151        | BB   | 0.4380      | 118.01991   | 3.93421      | 3.7900  |
| 2      | 31.577        | BB   | 0.6351      | 2650.67114  | 65.35944     | 85.1213 |
| 3      | 34.146        | BB   | 0.5004      | 135.25203   | 3.25741      | 4.3434  |
| 4      | 45.351        | BB   | 0.7070      | 210.04935   | 3.55680      | 6.7453  |

### HPLC spectrum of racemic 3q

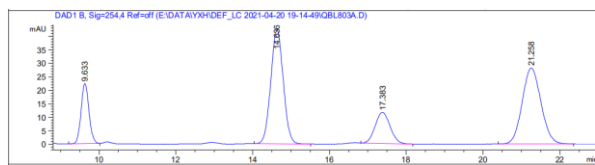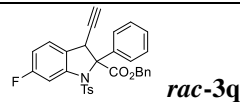

| Peak # | RetTime [min] | Type | Width [min] | Area mAU *s | Height [mAU] | Area %  |
|--------|---------------|------|-------------|-------------|--------------|---------|
| 1      | 9.633         | BB   | 0.2209      | 317.45682   | 22.18800     | 12.5080 |
| 2      | 14.636        | BB   | 0.3527      | 953.65851   | 42.03705     | 37.5748 |
| 3      | 17.383        | BB   | 0.4264      | 310.27069   | 11.51234     | 12.2249 |
| 4      | 21.258        | BB   | 0.5267      | 956.64240   | 28.13139     | 37.6923 |

### HPLC spectrum of 3q

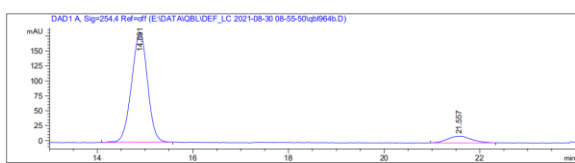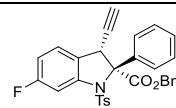

| Peak # | RetTime [min] | Type | Width [min] | Area mAU *s | Height [mAU] | Area %  |
|--------|---------------|------|-------------|-------------|--------------|---------|
| 1      | 10.494        | BB   | 0.2444      | 40.43941    | 2.50355      | 1.1030  |
| 2      | 16.134        | BB   | 0.3812      | 3625.72119  | 147.27196    | 98.8970 |

### HPLC spectrum of racemic 3r

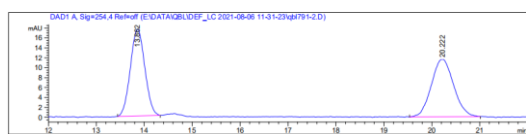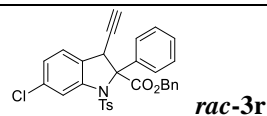

| Peak # | RetTime [min] | Type | Width [min] | Area mAU *s | Height [mAU] | Area %  |
|--------|---------------|------|-------------|-------------|--------------|---------|
| 1      | 13.862        | BB   | 0.3222      | 366.24289   | 17.49954     | 49.4509 |
| 2      | 20.222        | BB   | 0.4308      | 374.37640   | 11.59261     | 50.5491 |

### HPLC spectrum of 3r

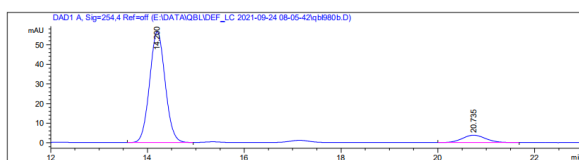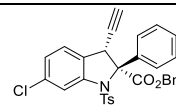

| Peak # | RetTime [min] | Type | Width [min] | Area mAU *s | Height [mAU] | Area %  |
|--------|---------------|------|-------------|-------------|--------------|---------|
| 1      | 14.200        | BB   | 0.3457      | 1258.08191  | 56.51557     | 90.8785 |
| 2      | 20.735        | BB   | 0.5075      | 126.27468   | 3.76342      | 9.1215  |



### HPLC spectrum of racemic 3s

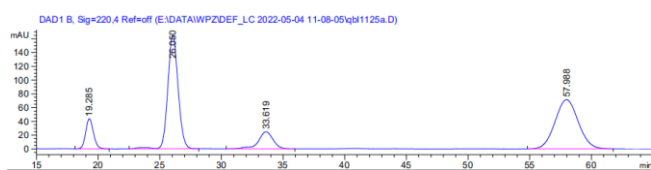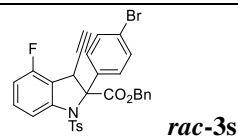

| Peak # | RetTime [min] | Type | Width [min] | Area mAU *s | Height [mAU] | Area %  |
|--------|---------------|------|-------------|-------------|--------------|---------|
| 1      | 19.285        | BB   | 0.6738      | 1910.61768  | 43.72711     | 8.3337  |
| 2      | 26.050        | VB R | 0.8975      | 9620.02148  | 164.35527    | 41.9606 |
| 3      | 33.619        | BB   | 1.2492      | 2029.53735  | 24.73686     | 8.8524  |
| 4      | 57.988        | BB   | 1.9618      | 9366.14355  | 71.42918     | 40.8532 |

### HPLC spectrum of 3s

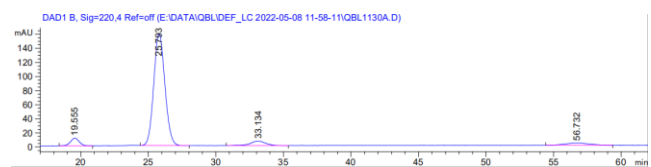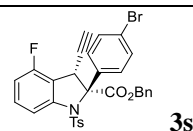

| Peak # | RetTime [min] | Type | Width [min] | Area mAU *s | Height [mAU] | Area %  |
|--------|---------------|------|-------------|-------------|--------------|---------|
| 1      | 19.555        | BB   | 0.6822      | 498.76178   | 10.97449     | 4.7538  |
| 2      | 25.793        | BB   | 0.8871      | 9095.28125  | 159.05850    | 86.6884 |
| 3      | 33.134        | BB   | 0.9768      | 503.76654   | 6.24716      | 4.8015  |
| 4      | 56.732        | BB   | 1.5017      | 394.11707   | 3.10313      | 3.7564  |

### HPLC spectrum of racemic 3t

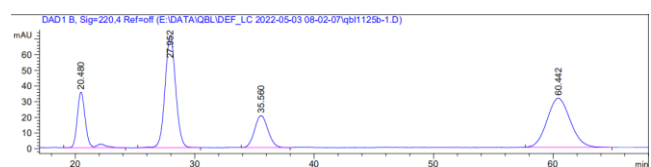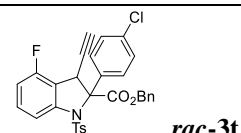

| Peak # | RetTime [min] | Type | Width [min] | Area mAU *s | Height [mAU] | Area %  |
|--------|---------------|------|-------------|-------------|--------------|---------|
| 1      | 20.480        | BV R | 0.7069      | 1736.57898  | 35.51460     | 14.4776 |
| 2      | 27.952        | VB R | 0.9595      | 4432.57959  | 71.57798     | 36.9536 |
| 3      | 35.560        | BB   | 1.2075      | 1593.15320  | 20.39088     | 13.2818 |
| 4      | 60.442        | BB   | 2.0624      | 4232.66406  | 31.44425     | 35.2870 |

### HPLC spectrum of 3t

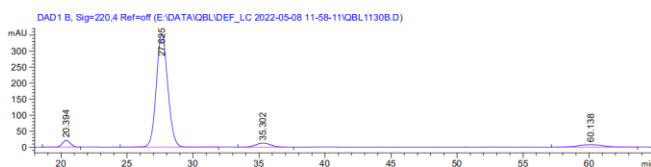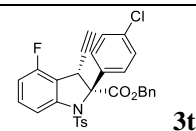

| Peak # | RetTime [min] | Type | Width [min] | Area mAU *s | Height [mAU] | Area %  |
|--------|---------------|------|-------------|-------------|--------------|---------|
| 1      | 20.394        | BB   | 0.6530      | 888.50214   | 21.02602     | 3.6455  |
| 2      | 27.625        | BV R | 0.9359      | 2.14335e4   | 354.83679    | 87.9410 |
| 3      | 35.302        | BB   | 1.2250      | 1017.46429  | 12.77807     | 4.1746  |
| 4      | 60.138        | BB   | 1.8336      | 1033.12646  | 7.64041      | 4.2389  |

### HPLC spectrum of racemic 3u

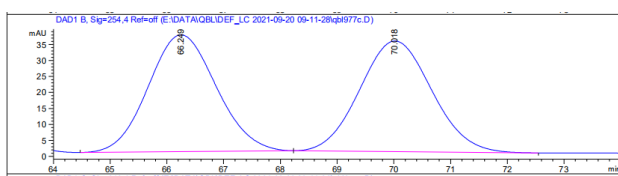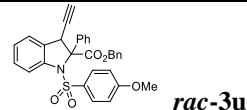

| Peak # | RetTime [min] | Type | Width [min] | Area mAU   | Area *s | Height [mAU] | Area %  |
|--------|---------------|------|-------------|------------|---------|--------------|---------|
| 1      | 66.249        | BB   | 1.2543      | 3046.27612 |         | 36.55230     | 49.8834 |
| 2      | 70.018        | BB   | 1.3107      | 3060.51855 |         | 34.64305     | 50.1166 |

### HPLC spectrum of 3u

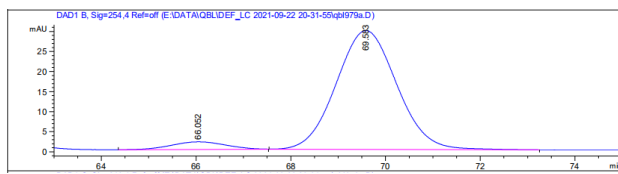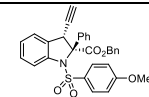

| Peak # | RetTime [min] | Type | Width [min] | Area mAU   | Area *s | Height [mAU] | Area %  |
|--------|---------------|------|-------------|------------|---------|--------------|---------|
| 1      | 66.052        | BB   | 1.0940      | 148.50117  |         | 1.88718      | 5.3258  |
| 2      | 69.583        | BB   | 1.4032      | 2639.81030 |         | 29.63686     | 94.6742 |

### HPLC spectrum of racemic 3v

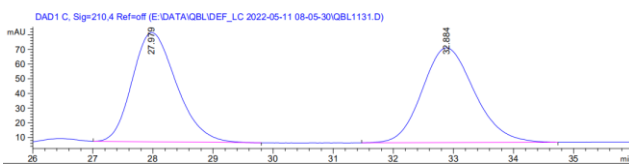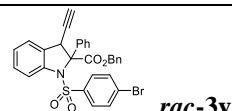

| Peak # | RetTime [min] | Type | Width [min] | Area mAU   | Area *s | Height [mAU] | Area %  |
|--------|---------------|------|-------------|------------|---------|--------------|---------|
| 1      | 27.979        | BB   | 0.7761      | 3803.92896 |         | 74.45191     | 49.3428 |
| 2      | 32.884        | BB   | 0.8857      | 3905.26416 |         | 64.56218     | 50.6572 |

### HPLC spectrum of 3v

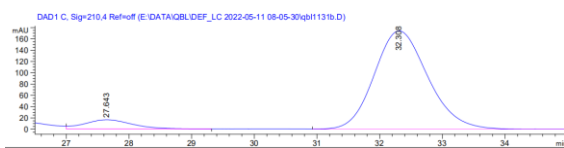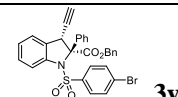

| Peak # | RetTime [min] | Type | Width [min] | Area mAU  | Area *s | Height [mAU] | Area %  |
|--------|---------------|------|-------------|-----------|---------|--------------|---------|
| 1      | 27.643        | VB   | 0.8101      | 857.70111 |         | 16.18911     | 7.6660  |
| 2      | 32.308        | BB   | 0.9171      | 1.03306e4 |         | 173.88759    | 92.3340 |

### HPLC spectrum of racemic 3w

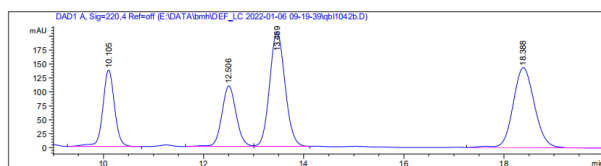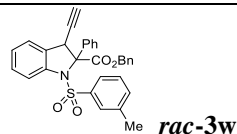

| Peak # | RetTime [min] | Type | Width [min] | Area mAU   | Area *s | Height [mAU] | Area %  |
|--------|---------------|------|-------------|------------|---------|--------------|---------|
| 1      | 10.105        | BB   | 0.2486      | 2214.48975 |         | 136.96439    | 17.0449 |
| 2      | 12.506        | BV   | 0.3048      | 2145.79272 |         | 108.46814    | 16.5162 |
| 3      | 13.469        | VB   | 0.3306      | 4376.29736 |         | 205.33977    | 33.6843 |
| 4      | 18.388        | BB   | 0.4600      | 4255.50146 |         | 143.50348    | 32.7546 |

### HPLC spectrum of 3w

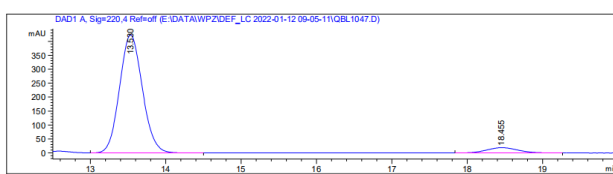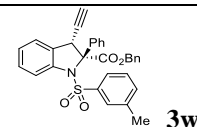

| Peak # | RetTime [min] | Type | Width [min] | Area mAU   | Area *s | Height [mAU] | Area %  |
|--------|---------------|------|-------------|------------|---------|--------------|---------|
| 1      | 13.530        | VB   | 0.3265      | 8888.71680 |         | 424.15143    | 94.2296 |
| 2      | 18.455        | BB   | 0.4410      | 544.31964  |         | 18.95827     | 5.7704  |

### HPLC spectrum of racemic 6

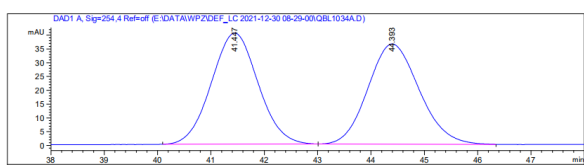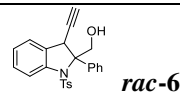

| Peak # | RetTime [min] | Type | Width [min] | Area mAU   | *s | Height [mAU] | Area %  |
|--------|---------------|------|-------------|------------|----|--------------|---------|
| 1      | 41.447        | BB   | 0.9003      | 2453.08789 |    | 40.29300     | 50.2570 |
| 2      | 44.393        | BB   | 0.9849      | 2427.99902 |    | 36.36797     | 49.7430 |

### HPLC spectrum of 6

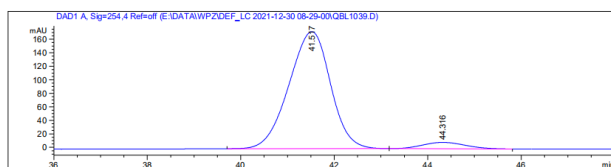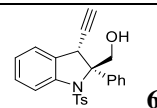

| Peak # | RetTime [min] | Type | Width [min] | Area mAU  | *s | Height [mAU] | Area %  |
|--------|---------------|------|-------------|-----------|----|--------------|---------|
| 1      | 41.517        | BB   | 0.9572      | 1.07047e4 |    | 173.16896    | 94.6357 |
| 2      | 44.316        | BB   | 0.7599      | 606.78784 |    | 9.51659      | 5.3643  |

### HPLC spectrum of racemic 7

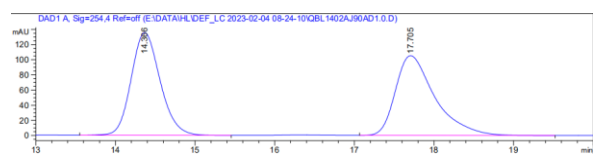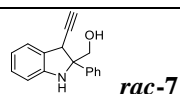

| Peak # | RetTime [min] | Type | Width [min] | Area mAU   | *s | Height [mAU] | Area %  |
|--------|---------------|------|-------------|------------|----|--------------|---------|
| 1      | 14.366        | BB   | 0.3913      | 3429.71265 |    | 135.48079    | 48.6496 |
| 2      | 17.705        | BB   | 0.5173      | 3620.10815 |    | 105.24466    | 51.3504 |

### HPLC spectrum of 7

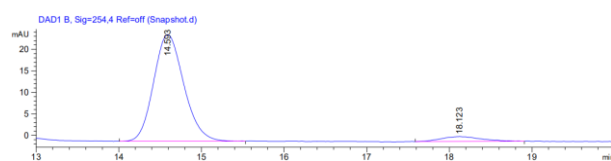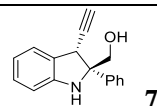

| Peak # | RetTime [min] | Type | Width [min] | Area mAU  | *s | Height [mAU] | Area %  |
|--------|---------------|------|-------------|-----------|----|--------------|---------|
| 1      | 14.593        | BB   | 0.3922      | 629.42072 |    | 24.79563     | 94.3376 |
| 2      | 18.123        | BB   | 0.4078      | 37.77952  |    | 1.13073      | 5.6624  |

### HPLC spectrum of racemic 8

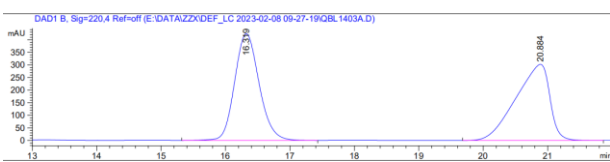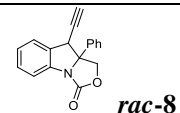

| Peak # | RetTime [min] | Type | Width [min] | Area mAU  | *s | Height [mAU] | Area %  |
|--------|---------------|------|-------------|-----------|----|--------------|---------|
| 1      | 16.319        | BB   | 0.4096      | 1.11770e4 |    | 423.96460    | 50.2427 |
| 2      | 20.884        | BB   | 0.5414      | 1.10690e4 |    | 302.15015    | 49.7573 |

### HPLC spectrum of 8

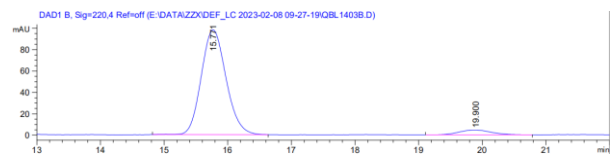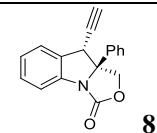

| Peak # | RetTime [min] | Type | Width [min] | Area mAU   | *s | Height [mAU] | Area %  |
|--------|---------------|------|-------------|------------|----|--------------|---------|
| 1      | 15.771        | VB R | 0.4214      | 2649.33252 |    | 97.99590     | 94.3778 |
| 2      | 19.900        | BB   | 0.4173      | 157.82471  |    | 4.56594      | 5.6222  |

### HPLC spectrum of racemic 9

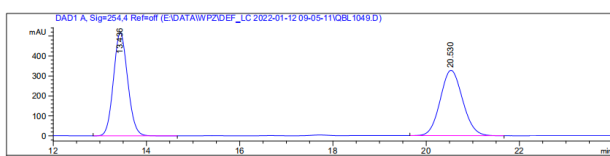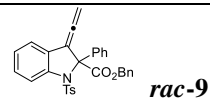

| Peak # | RetTime [min] | Type | Width [min] | Area mAU *s | Height [mAU] | Area %  |
|--------|---------------|------|-------------|-------------|--------------|---------|
| 1      | 13.436        | BB   | 0.3289      | 1.09236e4   | 516.22754    | 50.0129 |
| 2      | 20.530        | BB   | 0.5195      | 1.09180e4   | 327.02280    | 49.9871 |

### HPLC spectrum of 9

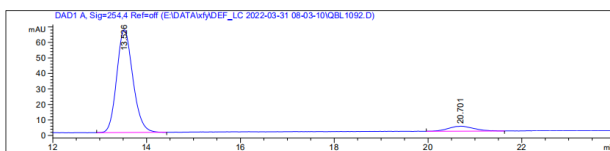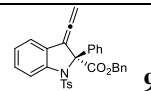

| Peak # | RetTime [min] | Type | Width [min] | Area mAU *s | Height [mAU] | Area %  |
|--------|---------------|------|-------------|-------------|--------------|---------|
| 1      | 13.526        | BB   | 0.3684      | 1580.36035  | 66.22723     | 93.0323 |
| 2      | 20.701        | BB   | 0.4695      | 118.36166   | 3.17081      | 6.9677  |
